# Supplementary material for: Long-read sequencing of 111 rice genomes reveals significantly larger pan-genomes
Source: PubMed Central journal article supplement — Genome Res. 2022 May;32(5):853–63. doi: 10.1101/gr.276015.121 (PMC9104699; doi:10.1101/gr.276015.121), 2022-05
Supplement: supp_gr.276015.121_Supplemental_materials_.pdf [file supp_gr.276015.121_Supplemental_materials_.pdf]

1

**Supplemental File for**

2

**Long-read sequencing of 111 rice genomes reveals significantly larger pan-genomes**

3

Fan Zhang, Hongzhang Xue, Xiaorui Dong, Min Li, Xiaoming Zheng, Zhikang Li, Jianlong

4

Xu, Wensheng Wang, and Chaochun Wei

5

6

|    |                                                                                |           |
|----|--------------------------------------------------------------------------------|-----------|
| 1  | <b>Table of Contents</b>                                                       |           |
| 2  | <b><i>Supplemental Notes</i></b> .....                                         | <b>4</b>  |
| 3  | <i>De novo</i> assembly, polishing, scaffolding and evaluation.....            | 4         |
| 4  | Pan-genome construction .....                                                  | 5         |
| 5  | Comparison to EUPAN and HUPAN .....                                            | 8         |
| 6  | RNA-seq validation, functional domain and GO annotation of the predicted novel |           |
| 7  | genes.....                                                                     | 9         |
| 8  | Impact of sequencing depths and sequencing platforms on gene PAV detection ... | 10        |
| 9  | Gene family PAV-based classification of rice populations .....                 | 10        |
| 10 | Examples of different PAVs derived from SGS and TGS.....                       | 11        |
| 11 | Comparisons of novel sequences and genes between different rice pan-genomes    | 12        |
| 12 | <b><i>Supplemental Figures</i></b> .....                                       | <b>14</b> |
| 13 | Supplemental Figure S1.....                                                    | 14        |
| 14 | Supplemental Figure S2.....                                                    | 15        |
| 15 | Supplemental Figure S3.....                                                    | 16        |
| 16 | Supplemental Figure S4.....                                                    | 17        |
| 17 | Supplemental Figure S5.....                                                    | 18        |
| 18 | Supplemental Figure S6.....                                                    | 19        |
| 19 | Supplemental Figure S7.....                                                    | 20        |
| 20 | Supplemental Figure S8.....                                                    | 21        |
| 21 | Supplemental Figure S9.....                                                    | 23        |
| 22 | Supplemental Figure S10.....                                                   | 24        |
| 23 | <b><i>Supplemental Tables</i></b> .....                                        | <b>26</b> |
| 24 | Supplemental Table S1 .....                                                    | 26        |
| 25 | Supplemental Table S2 .....                                                    | 26        |
| 26 | Supplemental Table S3 .....                                                    | 26        |
| 27 | Supplemental Table S4 .....                                                    | 26        |
| 28 | Supplemental Table S5 .....                                                    | 26        |
| 29 | Supplemental Table S6 .....                                                    | 26        |
| 30 | Supplemental Table S7 .....                                                    | 26        |
| 31 | Supplemental Table S8 .....                                                    | 26        |

1     **Supplemental Table S9** ..... 27  
2     **Supplemental Table S10** ..... 27  
3     **Supplemental Table S11** ..... 27  
4     ***References*** ..... 28  
5  
6

# 1 **Supplemental Notes**

## 2 ***De novo* assembly, polishing, scaffolding and evaluation**

3 For 75 newly sequenced OS accessions, each genome size was estimated using  
4 KmerGenie v1.7051 (Chikhi and Medvedev 2014) with short reads. The raw nanopore long  
5 reads were checked by NanoPlot v1.0.0 (De Coster et al. 2018) and trimmed ( $\geq Q7$ ,  $\geq 1000$ bp)  
6 by NanoFilt v2.6.0 (De Coster et al. 2018) with parameter “q 7 -l 1000”. The trimmed long  
7 reads were corrected and assembled using NextDenovo v2.2.0  
8 (<https://github.com/Nextomics/NextDenovo>) with the parameter “read\_cutoff = 1000,  
9 seed\_cutoff = 20000”.

10 After genome assembling, the contigs were polished with both long and short reads. First,  
11 contigs were polished using Racon v1.4.11 (Vaser et al. 2017) with the recommended  
12 parameter “-m 8 -x -6 -g -8 -w 500” and Medaka v0.11.5  
13 (<https://github.com/nanoporetech/medaka>) with the parameter “medaka\_consensus -m  
14 r941\_min\_high\_g303” with long reads. Next, all short reads were quality-controlled using  
15 FastQC v0.11.8 (<http://www.bioinformatics.babraham.ac.uk/projects/fastqc>) and trimmed  
16 using Trimmomatic v0.39 (Bolger et al. 2014) with the parameter “LEADING:3 TRAILING:3  
17 MINLEN:36 HEADCROP:10”. The contigs were mapped with short reads using Bowtie 2  
18 v2.3.5.1 (Langmead and Salzberg 2012) and polished one round using Pilon v1.23 (Walker et  
19 al. 2014) with the default parameters.

20 For nine accessions sequenced by PacBio and Illumina platforms (H7L1 [Huanghuazhan],  
21 H7L26 [CDR22], H7L27 [PsBRC28], H7L28 [PsBRC66], H7L29 [IR64], H7L30 [Teqing],  
22 H7L31 [IR50], H7L32 [OM1723] and H7L33 [Phalguna]) in the 13 OS accessions, the long

1 reads were assembled using FALCON v1.8.7 (Chin et al. 2016). The assembled contigs were  
2 then polished using smrtlink v4.0 (<https://www.pacb.com/support/software-downloads>) with  
3 long reads and using Pilon with short reads.

4 Four of the 13 accessions were sequenced by Nanopore and Illumina platforms (SE-3  
5 [BR 24], SE-19 [Zhong 413], SE-33 [BG 300] and SE-134 [Haonnong]).The long reads were  
6 first corrected using Nextdenovo and then assembled using smartdenovo  
7 (<https://github.com/ruanjue/smartdenovo>). The assembled contigs were polished using Pilon  
8 for three times with short reads.

9 For other rice accessions, we directly used assemblies and long reads published in NCBI  
10 SRA database in downstream analysis. With the NipRG's guide, contigs misassembled were  
11 corrected using "ragtag.py correct" and chromosome-level scaffolds were achieved using  
12 "ragtag.py scaffold" in RaGOO RagTag v1.0.0 (Alonge et al. 2019), which invoked MUMmer  
13 v3.9.4 (Kurtz et al. 2004) at the mapping step and minimap2 v2.17 (Li 2018) at the checking  
14 step. The quality of each genome assembly was evaluated by mapping to the NipRG with at  
15 least 90% as the threshold using QUAST v5.0.2 (Mikheenko et al. 2018) identity with the  
16 parameter "--min-identity 90". The completeness of each genome assembly was evaluated  
17 using BUSCO v5.1.2 (Seppey et al. 2019) with the database embryophyta\_odb10 (eukaryota,  
18 2020-09-10).

19

## 20 **Pan-genome construction**

1 The “map-to-pan” strategy was used to build the rice pan-genomes by combining NipRG  
2 and all novel sequences obtained from 111 cultivated and wild rice accessions / 105  
3 cultivated rice accessions from both TGS and SGS (Supplemental Fig. S3). The sequences  
4 and gene annotations of the reference genome are available and high-quality  
5 (<http://rice.plantbiology.msu.edu>), so we focused on novel gene annotations from the  
6 obtained novel sequences.

7 At the step of unaligned sequences filtering, we tried to cut the partially unaligned  
8 sequences in order to retain the sequences not similar with reference genome (defined as  
9 “unmapped sequence blocks”). A scaffold/contig may contribute more than one unmapped  
10 sequence blocks.

11 At the step of redundancy removing, we chose Gclust instead of cd-hit-est for redundant  
12 sequence removing due to its ability to handle very long sequences. The remaining  
13 sequences were clustered into non-redundant sequences with identity cutoff of 90% using  
14 Gclust v1.0.0 (Li et al. 2019) with the parameter “-minlen 20 -both -nuc -threads 40 -ext 1 -  
15 sparse 2 -memiden 90”. Since redundant removing step is important for pan-genome  
16 construction, we applied the EUPAN blastCluster steps with identity cutoff of 90% again after  
17 the initial sequence redundancy removing again to ensure that we did not over-estimate the  
18 size of novel sequences.

19 In order to remove various contaminants not from Viridiplantae such as archaea, bacteria,  
20 viruses, fungi, the remaining sequences were mapped to NT database (18 Jun 2020) using  
21 BLAST+ v2.10.1 (Camacho et al. 2009) BLASTN with the parameter “-evalue 1e-5 -

1 best\_hit\_overhang 0.25 -perc\_identity 0.5 -max\_target\_seqs 1". The sequences with hits from  
2 contaminants were dropped and the rest sequences were defined as candidate novel  
3 sequences.

4 A coverage-based method was used to check mis-assemblies in candidate novel  
5 sequences. First, the trimmed short reads and trimmed long reads were mapped to sequences  
6 combining NipRG and candidate novel sequences with Bowtie 2 v2.3.5.1 (Langmead and  
7 Salzberg 2012) and minimap2 v2.17 (Nanopore reads: map-ont, PacBio reads: map-pb) (Li  
8 2018). Second, the alignment results were sorted with SAMtools v1.9 (Li et al. 2009). For each  
9 candidate novel sequence, we calculated the maximum mapped reads coverage in all  
10 samples from either short reads or long reads using BEDTools v2.29.2 (Quinlan and Hall 2010)  
11 with the parameter "genomecov -bga -split". Finally, the candidate novel sequences with more  
12 than 90% mapped region in at least one sample were considered as verified novel sequences.

13 Although the novel sequences were non-redundant, their borders may cover parts of gene  
14 bodies, resulting in predicting incomplete gene structures. To minimize the effect of this issue,  
15 we tried to elongate sequences to retain the whole gene body in the gene annotation step,  
16 and shortened sequences with no novel genes in elongated regions after the similar gene  
17 removing step. We estimated the elongated length = 5,000bp according to 90% quantile length  
18 of the predicted genes (~4,600bp). When two elongated sequences were close enough so  
19 that they overlap in a specific genomic location, they were merged into one single sequence  
20 for gene annotation. The novel representative genes in gene families were kept. We shortened

1 the sequences with no novel predicted genes in the elongated regions. The final pan-genome  
2 was generated by combining NipRG and novel sequences, with MSU7 and novel genes.

3

#### 4 **Comparison to EUPAN and HUPAN**

5 For the comparison to the previous state-of-the-art approaches, we have applied this  
6 method and two of the state-of-the-art methods, EUPAN and HUPAN, to the 63-TGSRG data.  
7 EUPAN and HUPAN, were both developed to construct pan-genomes from short-read  
8 sequencing data, and they could not finish the whole pan-genome construction process for  
9 the long-read sequencing data. EUPAN keeps only the fully unaligned sequences, while  
10 HUPAN (an improved method for human pan-genome construction published in Genome  
11 biology, 2019) keeps the fully unaligned and partially unaligned sequences. However, at the  
12 step of redundancy removing, EUPAN used cd-hit-est as the tool to do the first round  
13 redundant sequence removing, and it may fail for long sequence mapping. We chose Gclust  
14 instead of cd-hit-est for redundant sequence removing. As mentioned in the cd-hit website  
15 (<http://weizhong-lab.ucsd.edu/cd-hit/servers.php>), the newly developed Gclust can deal with  
16 very long sequences. If EUPAN was applied to the 63-TGSRG data, only 1.05 Mb with 71  
17 sequences in total from 40 of the 63 samples would be considered as full unaligned (before  
18 the redundancy removing step), the other sequences would be considered as partially  
19 unaligned sequences. For HUPAN, similarly but more extremely, it would consider almost all  
20 assembled contigs/scaffolds as partially unaligned. Because the assembled contigs/scaffold  
21 were very long and we knew some regions could be aligned to the reference genome with



1 high identify percentage, we considered both results from EUPAN and HUPAN not reasonable.  
2 The method introduced in this article tried to cut the partially unaligned sequences into blocks  
3 and retain the sequence blocks not similar to the reference genome to ensure the novel  
4 sequences remained in the final pan-genome were at least as novel (not similar to the  
5 reference genome) as the results from EUPAN or HUPAN for short-read sequencing data.

6

### 7 **RNA-seq validation, functional domain and GO annotation of the predicted novel genes**

8 RNA-seq data from 122 public samples (61 rice accessions of 2 tissues) were collected  
9 to validate the expressions of genes. All raw reads were quality-controlled using FastQC  
10 v0.11.8 and trimmed using Trimmomatic v0.39 with the parameter “LEADING:3 TRAILING:3  
11 MINLEN:36 HEADCROP:10”. The trimmed reads were mapped to all transcripts (including  
12 55,986 MSU7 genes and 19,319 novel genes). Only reads mapped in proper pair (that is,  
13 reads of a pair were mapped to the same transcript) were considered using SAMtools v1.9  
14 with the parameters “view -f 2”. The coverage of transcripts was computed from BAM files  
15 using BEDTools v2.29.2 with the parameters “genomecov -ibam bamfile -max 1”. The  
16 transcripts with more than 95% coverage were considered as with expression evidence. The  
17 protein sequences of the predicted novel genes were extracted and input to InterProScan  
18 v5.45-80.0 (Jones et al. 2014), a tool integrated CDD-3.17, Coils-2.2.1, Gene3D-4.2.0,  
19 Hamap-2020\_01, MobiDBLite-2.0, Pfam-33.1, PIRSF-3.10, PRINTS-42.0, ProSitePatterns-  
20 2019\_11, ProSiteProfiles-2019\_11, SFLD-4, SMART-7.1, SUPERFAMILY-1.75 and  
21 TIGRFAM-15.0 to predict domains and important sites of their proteins. The GO terms of

1 proteins were annotated as described in a previous study (Wang et al. 2018). Finally, 75.9%  
2 (14,658/19,319) of the predicted novel genes were annotated with at least one GO. GO  
3 enrichment analysis was performed using the package clusterProfiler v3.16.1 (Yu et al. 2012)  
4 in R v4.0.2. The GO terms with adjust  $P < 0.05$  using the Benjamini & Hochberg (BH) method  
5 were retained.

6

### 7 **Impact of sequencing depths and sequencing platforms on gene PAV detection**

8 In order to assess the possible effects of sequencing depths and sequencing platforms  
9 on gene PAVs detection, we compared gene family PAVs of accession IR64 sequenced by  
10 both Nanopore (ONT) and PacBio (PB) technologies with different sequencing depths (ont24x:  
11 9.3Gbs; pb157x: 59.7Gbs; and pb85x: 32.2Gbs) and observed high Jaccard Indices (JIs)  
12 among them (0.962 ~ 0.977). This indicated that the sequencing platforms and sequencing  
13 depths have very limited impact on the gene family PAVs assessment, but higher sequencing  
14 depths did detect more gene families (Supplemental Fig. S7A).

15

### 16 **Gene family PAV-based classification of rice populations**

17 Based on the gene family PAVs, the 105 OS accessions could be classified into four major  
18 populations of XI (XI-1A, XI-1B, XI-2 and XI-3), GJ (GJ-tmp, GJ-sbtrp, and GJ-trp), cA and cB,  
19 largely consistent with previous classification of 3K-RG using single nucleotide polymorphisms  
20 (SNPs) (Wang et al. 2018) (Fig. 2E,F; Supplemental Fig. S7E,F). The genetic similarity was  
21 high between cA and XI (median JI = 0.905), and between GJ and cB (median JI = 0.909),

1 relatively low between XI/cA and GJ (median JI = 0.886/0.893), while the genetic similarity  
2 was high between subpopulations within XI (median JI = 0.923) or between subpopulations  
3 within GJ (median JI = 0.933) (Supplemental Fig. S7G,H). We noted three GJ accessions  
4 (TG64 [KAUK PAHLING], TG52 [VARIRANGAHY] and TG75 [Annongwangeng B] from GJ-  
5 sbtrp, GJ-trp and GJ-tmp), a cA accession (TG11 [JHONA 101]) and a cB accession (TG85  
6 [Karnal Local]) were clustered into XI. An XI accession (TG16 [PHAN PHAE]) from Laos was  
7 clustered into population cB (Fig. 2F). The six OR accessions were well differentiated from the  
8 OS populations and formed two subpopulations with a genetic similarity of 0.901 (wild12,  
9 wild65, wild111 and wild131) and 0.909 (wild219 and wild273). The first cluster contains four  
10 accessions (wild12, wild65, wild111 and wild131 collected from Hainan [China], Sri Lanka,  
11 Naypyidaw [Myanmar] and Yangon [Myanmar]) and has JI of 0.878, 0.880, 0.896, 0.890 with  
12 XI, cA, GJ and cB. The remaining two accessions (wild219 and wild273 collected from Fujian  
13 [China] and Guangxi [China]) formed a separate cluster more closely related to population GJ  
14 and has JI of 0.874, 0.875, 0.874 and 0.869 with XI, cA, GJ and cB, respectively.

15

### 16 **Examples of different PAVs derived from SGS and TGS**

17 Two DNA transposon related genes, *LOC\_Os05g27600* and *LOC\_Os06g49820*, of Chr5  
18 and Chr6 (Fig. 3G; Supplemental Fig. S8K) were shown in the main manuscript as examples  
19 to show short reads of SGS data did not have the complete upstream and downstream  
20 sequences of the genes with

1 repetitive sequences and thus confused PAVs detection or structure variation (SV)  
2 detection. These two homozygous deletions were also supported with the SV detection (10.4  
3 kb deletion near *LOC\_Os06g49882* with 65 supported reads; 5.7 kb deletion near  
4 *LOC\_Os05g27600* with 77 supported reads).

5 More examples, such as the gene PAVs for genes *LOC\_Os04g01520* (Fig. 3H) and  
6 *LOC\_Os04g31640* (Supplemental Fig. S8L) were detected only by TGS but rarely detected  
7 by SGS.

8

### 9 **Comparisons of novel sequences and genes between different rice pan-genomes**

10 OS pan-genomes (63-TGSRG/63-SGSRG) were built from 63 OS accessions selected  
11 from 3K-RG (TG1, TG2, TG3, TG4, TG5, TG6, TG7, TG8, TG9, TG10, TG13, TG14, TG15,  
12 TG17, TG18, TG19, TG21, TG22, TG24, TG27, TG28, TG29, TG30, TG31, TG32, TG33,  
13 TG34, TG42, TG43, TG45, TG46, TG49, TG50, TG51, TG52, TG53, TG55, TG56, TG58,  
14 TG59, TG60, TG61, TG62, TG63, TG64, TG65, TG68, TG70, TG75, TG76, TG77, TG78,  
15 TG80, TG81, TG82, TG83, TG84, TG85, TG86, TG87, TG88, TG90 and WW8) . These two  
16 pangomes were constructed with the same method reported previously (Wang et al. 2018)  
17 for SGS data in three steps including getting unaligned contigs (more than 500bp), removing  
18 redundant sequences, and dropping contaminants.

19 The repeat-masked non-redundant novel sequences in different pan-genomes (111-  
20 TGSRG, 63-TGSRG, 63-SGSRG, 3K-RG, 105OS-TGSRG and 6OR-TGSRG) were compared.  
21 For genome sequence level, they were aligned to each other using BLASTN with the

1 parameter “-evalue 1e-5 -max\_target\_seqs 10000”. A query sequence with various identity  
2 and length was considered according to different cutoffs. The total length of aligned regions  
3 was divided by the total repeat-masked non-redundant novel sequence length to obtain the  
4 total mapping length rate, which was used to measure the similarity between the pan-genomes.

5 We compared novel genes to the genomic sequences, transcripts and proteins from  
6 different pan-genomes. For novel genes with multiple transcripts, we chose the longest  
7 transcripts as queries and we constructed the pan-genomes as the database. The transcripts  
8 were aligned to the pan-genomes using BLASTN with the parameter of “-evalue 1e-5”. The  
9 high-scoring segment pairs (HSPs) with identity  $\geq 95\%$  were considered as hits and transcripts  
10 with  $\geq 95\%$  of regions covered were considered as aligned. At transcriptomic level, we  
11 compared transcripts from different pan-genomes using cd-hit-est-2d in CD-HIT v4.8.1 with  
12 sequence identity threshold parameter of “-c 0.95”. At proteomic level, we mapped proteins of  
13 the predicted novel genes to all proteins from different rice pan-genomes (3K-RG, 63-TGSRG,  
14 111-TGSRG, 66-RG) using cd-hit-2d in CD-HIT v4.8.1 with two sequence identity thresholds’  
15 parameters of “-c 0.95” or “-n 2 -c 0.5”. The mapping rate is the number of genes mapped to  
16 the database divided by the total number of genes.

17

# 1 Supplemental Figures

## 2 Supplemental Figure S1

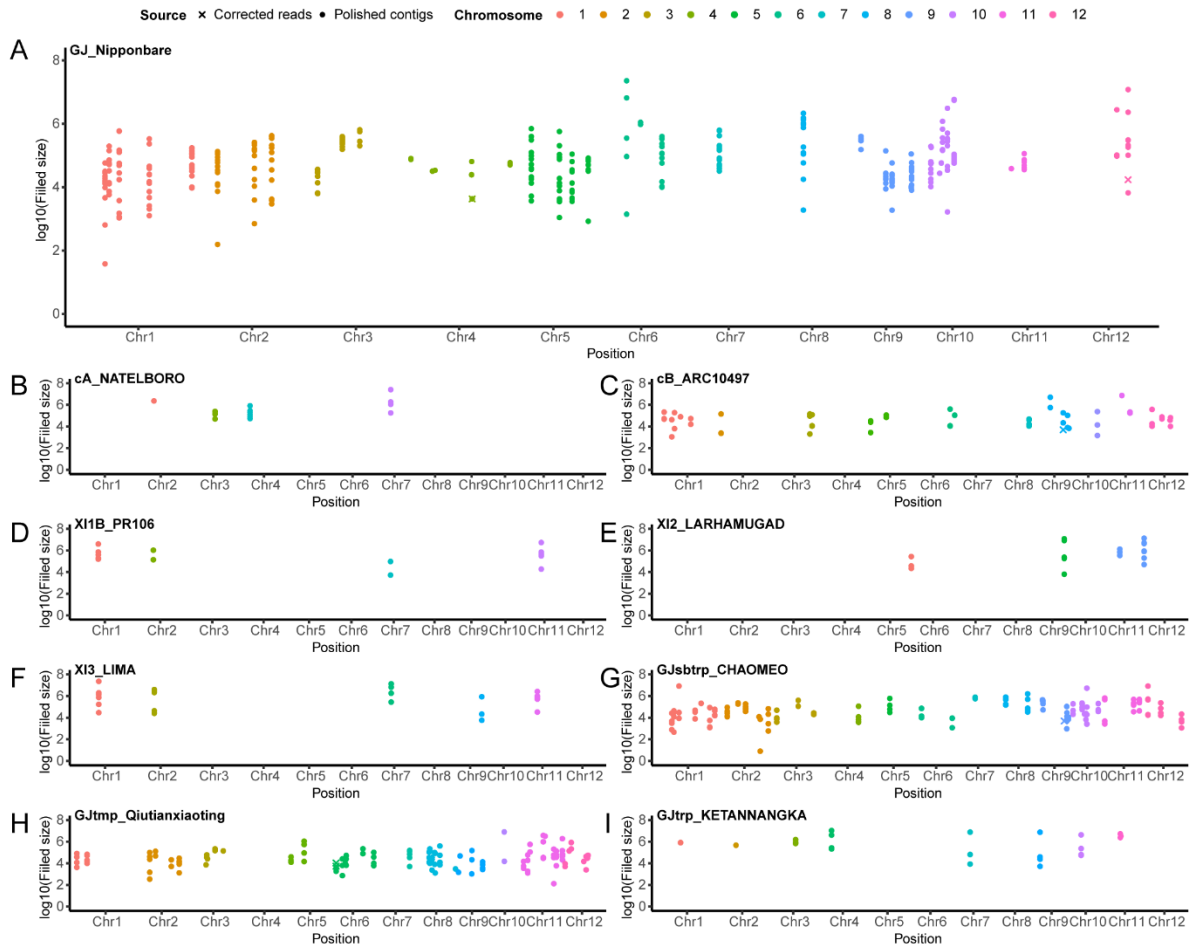

3

4 **Figure S1.** The filled gaps of 9 high-quality reference genomes. (A) The sizes of filled gaps  
 5 ( $\geq 1000$ bp) in different chromosomes of Nipponbare. (B-I) The sizes of filled gaps in  
 6 different chromosomes of (B) cA\_NATELBORO , (C) cB\_ARC10497, (D) XI-1B\_PR106, (E)  
 7 XI-2\_LARHAMUGAD, (F) XI-3\_LIMA, (G) GJ-sbtrp\_CHAOME0, (H) GJ-  
 8 tmp\_Qiutianxiaoting, and (I) GJ-trp\_KETANNANGKA.

1 **Supplemental Figure S2**

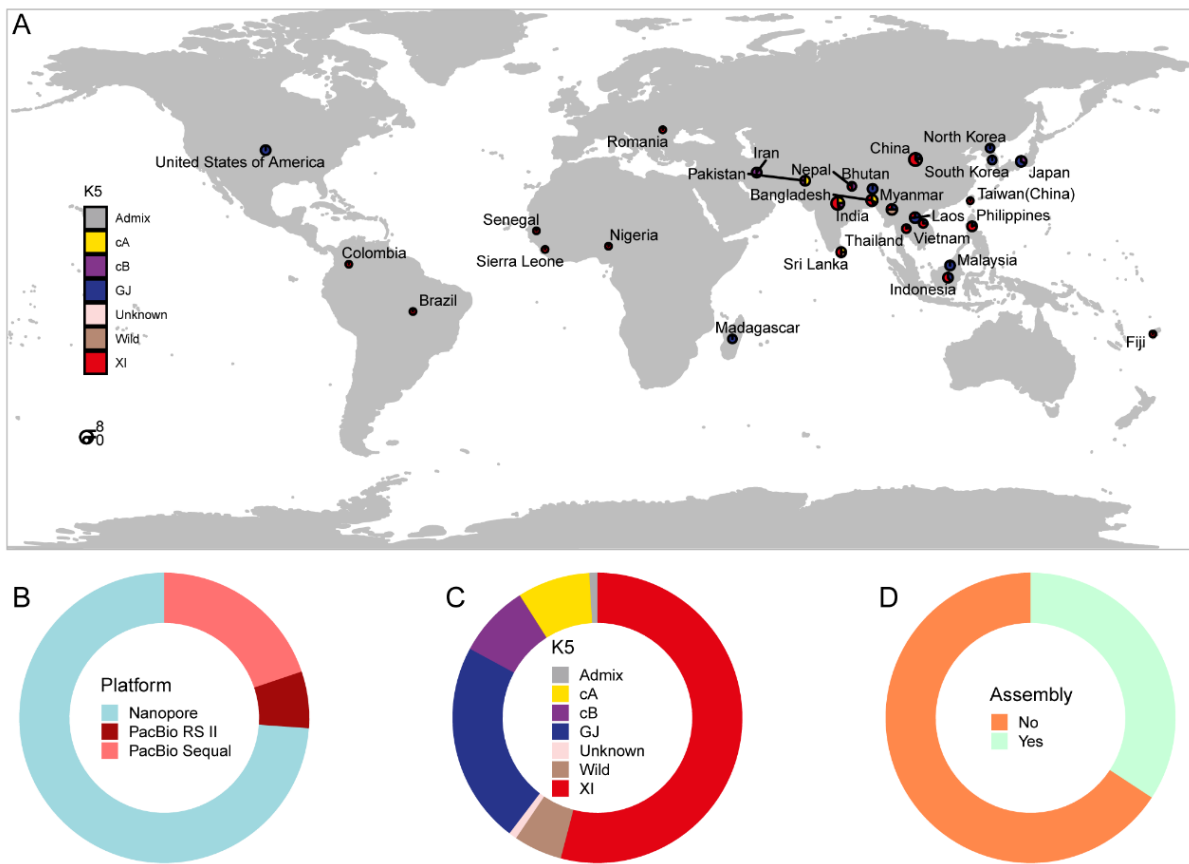

2  
 3 **Figure S2.** The summary of 111 rice accessions used in this study. (A) The geographical  
 4 distribution and K5 subpopulation information of 111 rice accessions. (B-D) The sequencing  
 5 platforms, K5 subpopulation information, data types (assembled genomes downloaded from  
 6 a public database or newly sequenced genomes) of 111 rice accessions.  
 7 The color stands for the K5 subpopulations of 111 rice accessions. (cA: Aus, cB: Bas, XI:  
 8 Xian/Indica, GJ: Geng/Japonica, and Admix: Admixture).

9

1 **Supplemental Figure S3**

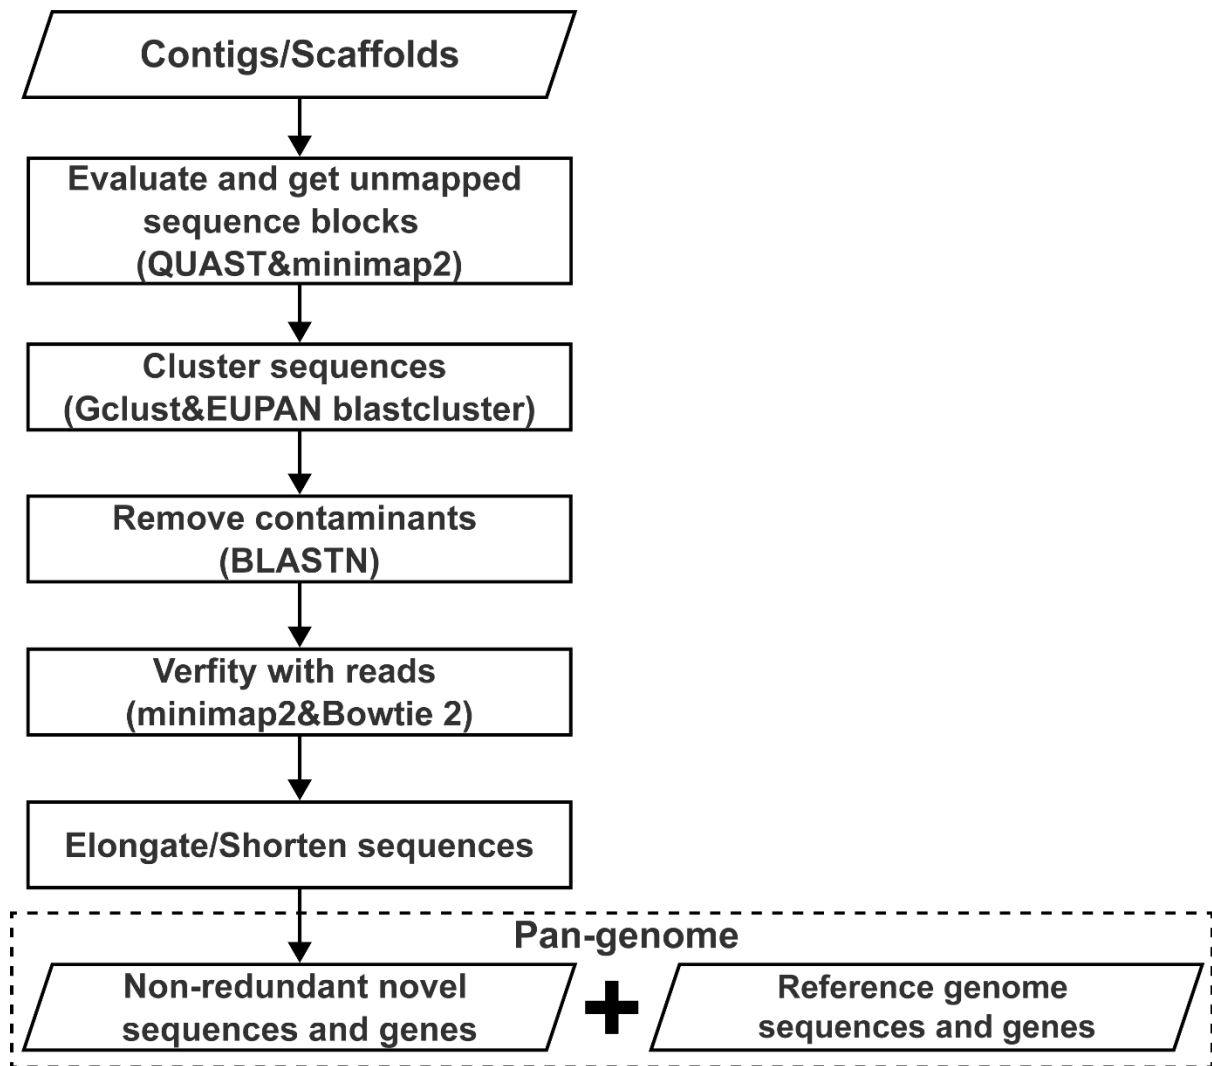

2  
3  
4  
5  
6  
7  
8  
9  
10  
11  
12  
13  
14  
15

**Figure S3.** The system diagram of pan-genome construction method for 111 rice accessions. Evaluate and get unmapped sequence blocks: The unmapped sequence blocks more than 500 bp (from QUAST evaluation results of contigs/scaffolds) were mapped to NipRG (including mitochondrion and plastid) again using minimap2. Cluster sequences: The unmapped sequences were clustered using Gclust and EUPAN blastcluster to choose the representative ones. Remove contaminants: The unmapped sequence blocks were aligned to NT database using BLASTN and the ones aligned to organisms out of Viridiplantae were removed. Verify with reads: The reads were mapped to the retained unmapped sequence blocks and remove low-coverage ones. Elongate/Shorten sequences: The unmapped sequences will be elongated if the new genes are predicted overlap the bounds of unmapped sequence blocks. The final pan-genome combines non-redundant novel sequences and genes with reference genome sequences and genes.



1 **Supplemental Figure S4**

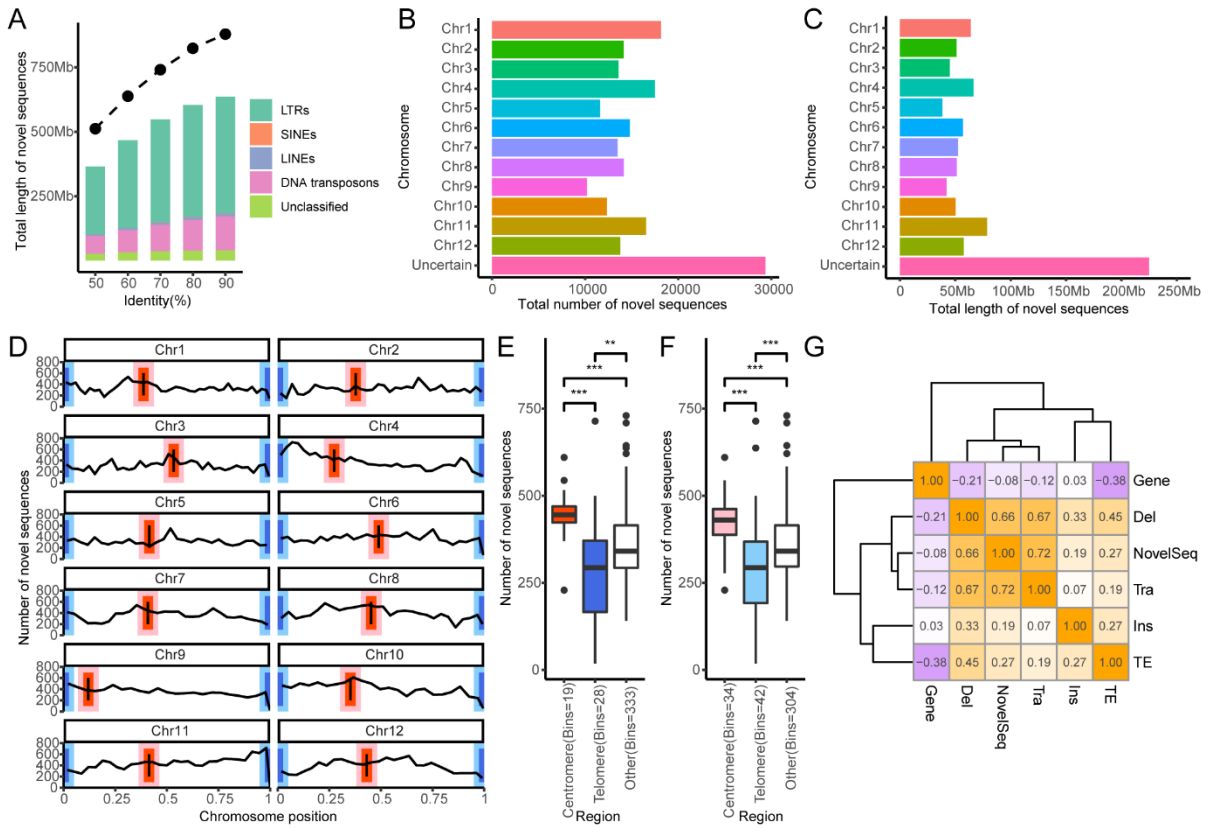

2

3 **Figure S4.** The non-redundant novel sequences of 111 rice accessions. (A) The total sizes  
 4 and their TE components of novel sequences constructed with different parameter settings,  
 5 especially the global identity percentages set in the redundancy removing step (B) The  
 6 numbers of novel sequences and (C) The total lengths of novel sequences in different  
 7 chromosomes. (D) The distribution of novel sequences in different chromosomes. (E-F) The  
 8 number of novel sequences near centromere/telomere/other regions. Red/pink: upstream  
 9 and downstream 2.5% / 5% regions near the centromeres. Blue / lightblue: upstream or  
 10 downstream 2.5% / 5% regions near telomeres. White: Other regions. (G) The spearman  
 11 correlation coefficients between any two distributions of genes / deletions / novel sequence /  
 12 translocation breakpoints / insertions / TEs.

13

1 **Supplemental Figure S5**

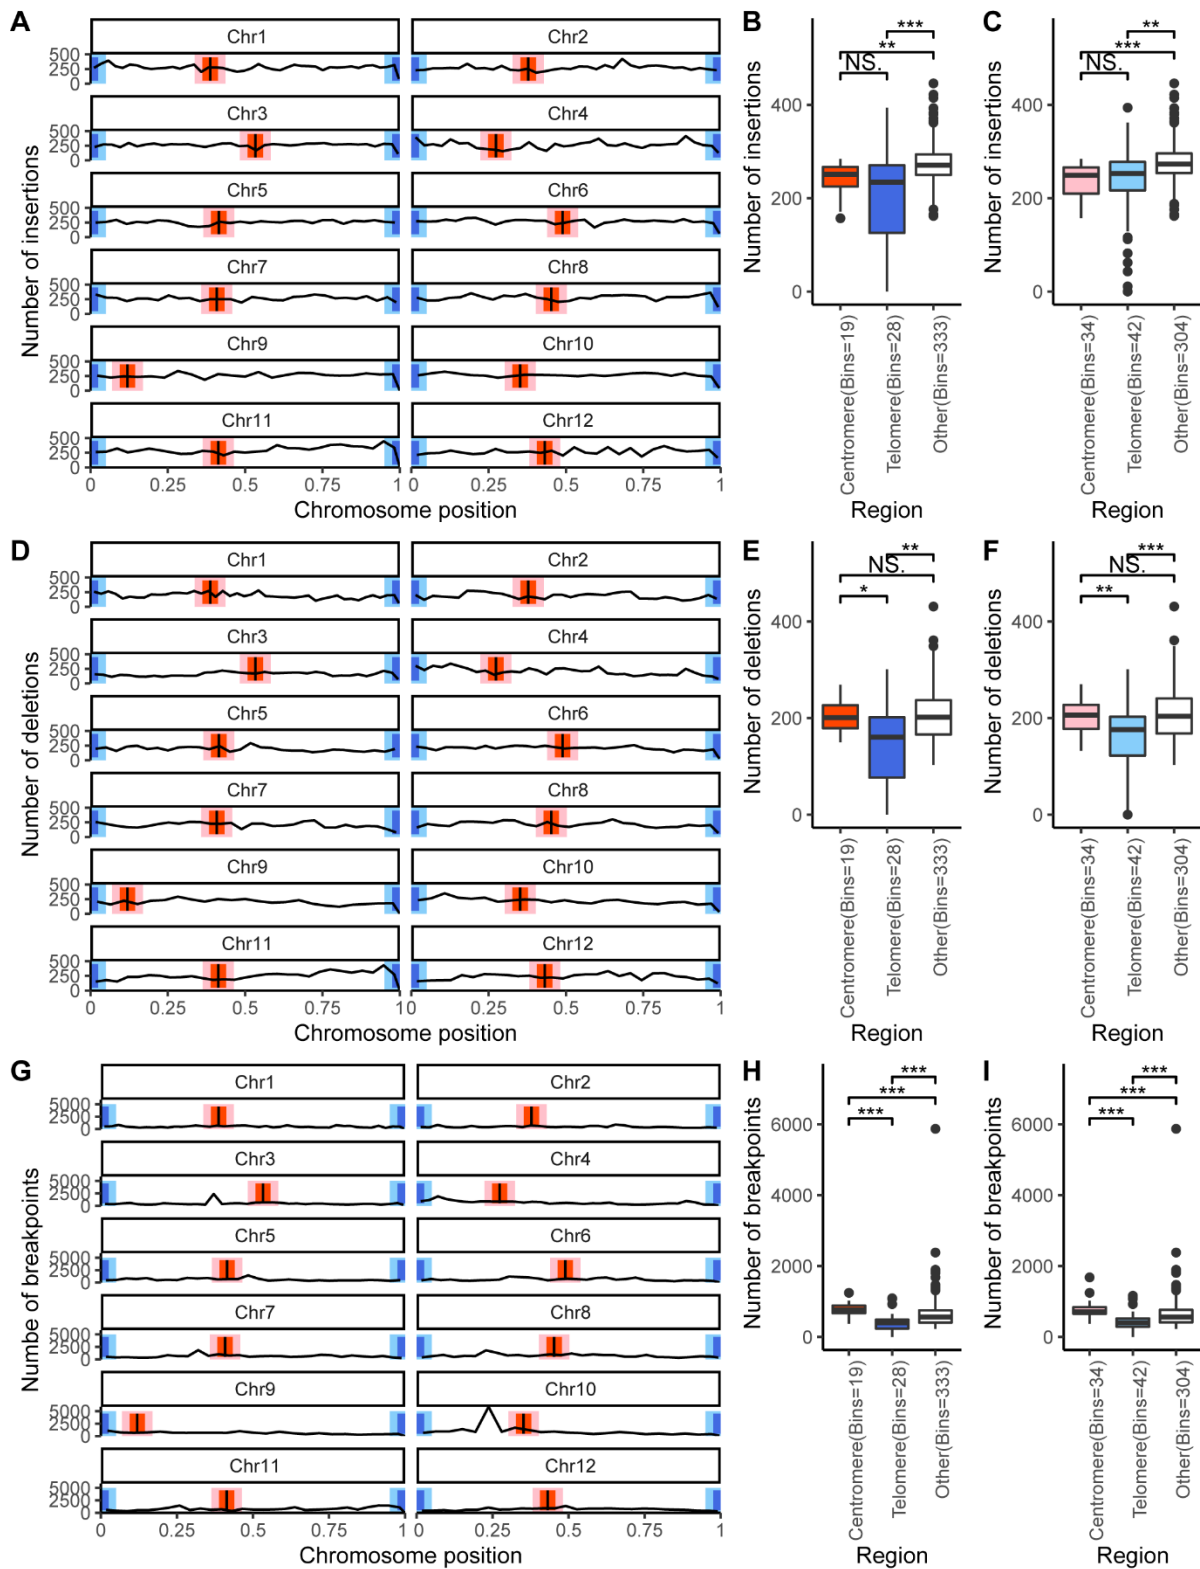

2

3 **Figure S5.** The non-redundant SVs of 111 rice accessions. (A-C) insertions. (D-F) deletions.  
4 (G-I) translocation breakpoints. The color scheme is the same as in Supplemental Figure  
5 4D-4F.

6

1 **Supplemental Figure S6**

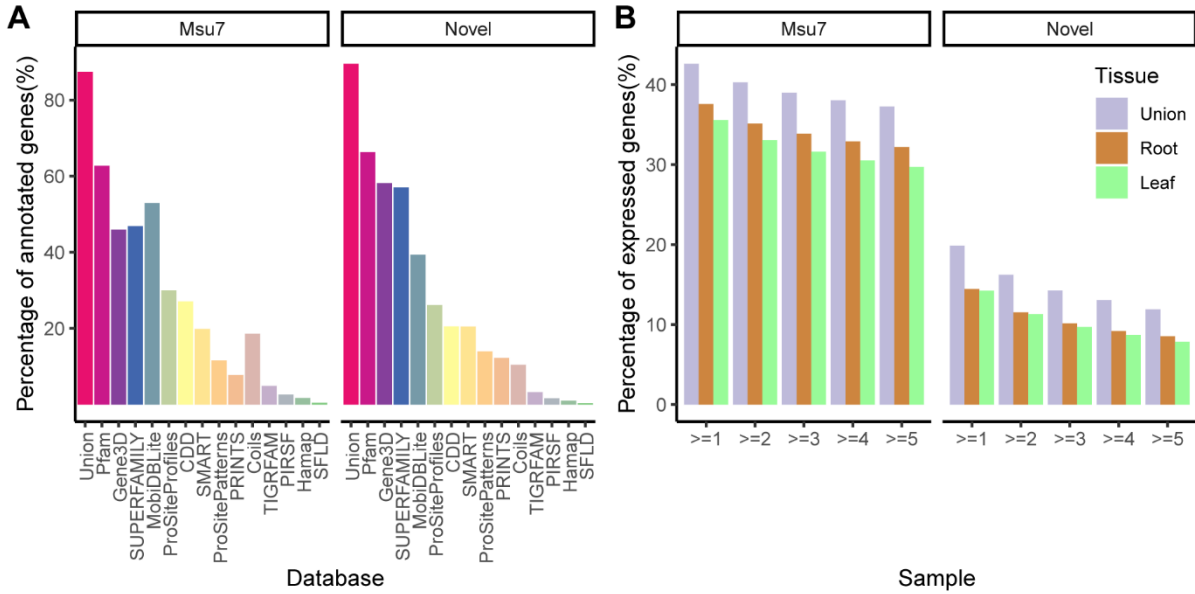

2  
 3 **Figure S6.** The percentage of MSU7 genes (n=55,986) and novel genes (n=19,319) with  
 4 domain annotation and RNA-seq evidence. (A) MSU7 genes and novel genes with domain  
 5 annotation. ‘Union’ means the union of database Pfam, Gene3D, SUPERFAMILY,  
 6 MobiDBLite, ProSiteProfiles, CDD, SMART, ProSitePatterns, PRINTS, Coils, TIGRFAM,  
 7 PIRSF, Hamap and SFLD. (B) MSU7 genes and novel genes with RNA-seq evidence.  
 8 ‘Union’ means the union of tissue root and leaf.

9

1 Supplemental Figure S7

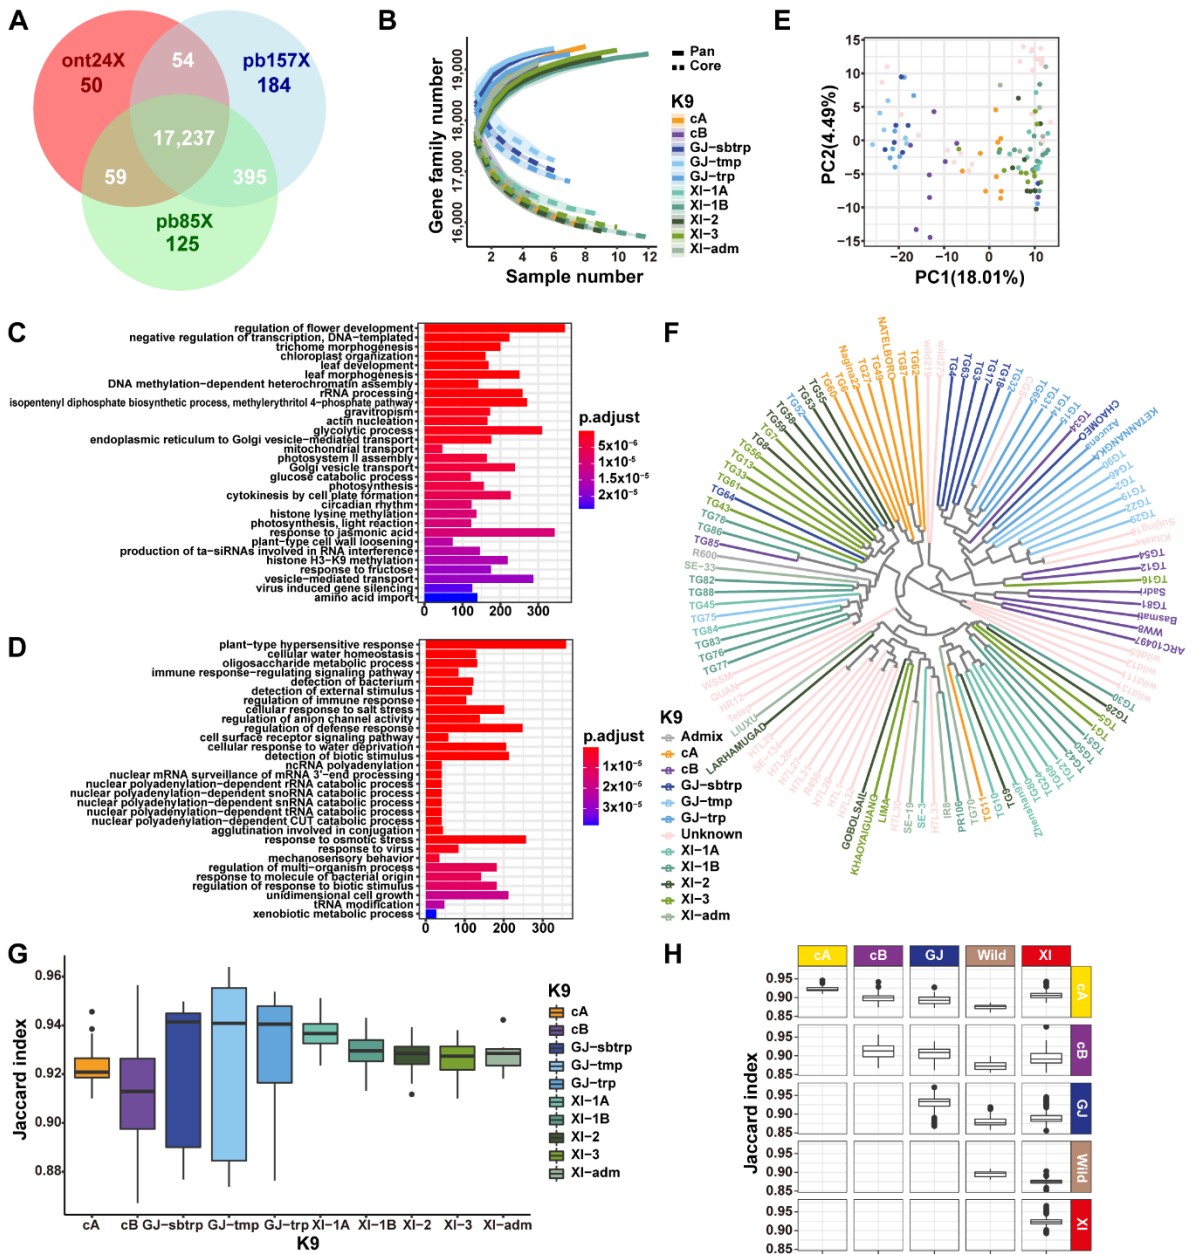

2  
 3 **Figure S7.** Gene family PAVs of 111 rice accessions. (A) Gene family level overlapping of  
 4 rice accession IR64 sequenced with Nanopore 24x (ont24X), PacBio 157x (pb157X) and  
 5 PacBio 85x (pb85X). (B) The pan-genome size estimation using 111 rice accessions for K9  
 6 subpopulations (Admix and GJ-adm were ignored due to their small sample sizes (one  
 7 sample and no sample respectively)). (C) The biological process GO enrichment terms of  
 8 core and softcore genes. (D) The biological process GO enrichment terms of distributed  
 9 genes. (E) The PCA analysis of 111 rice accessions of K9 subpopulations using gene family  
 10 PAVs. (F) The clustering of 111 rice accessions using gene family PAVs. (G) The similarity  
 11 of gene family PAVs in K9 subpopulations. (H) The similarity of gene family PAVs in and  
 12 between K5 and wild subpopulations.

1

## 2 Supplemental Figure S8

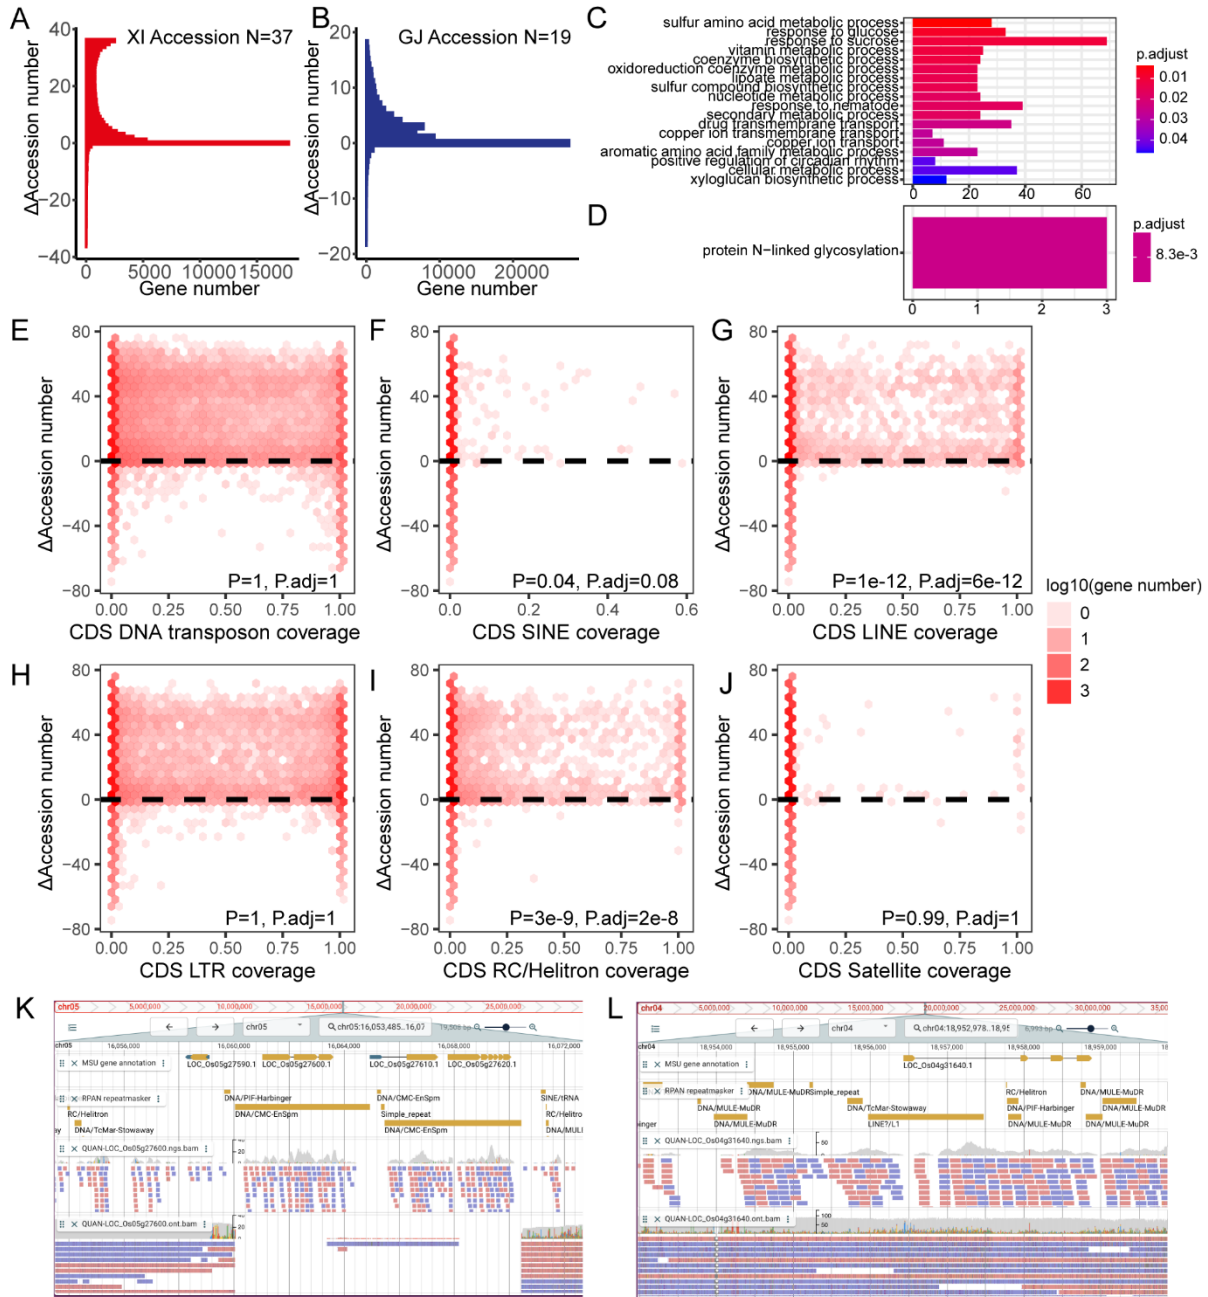

3

4

5

6

7

8

9

10

**Figure S8.** The differences of gene PAVs from NGS and TGS data. (A-B) The relationship between the numbers of accessions with different number of gene PAVs detected (for each gene,  $\Delta$ Accession number = TGS detected accession number - NGS detected accession number) and gene numbers in (A) XI population (Accession N=37) and (B) GJ population (Accession N=19). (C-D) The biological process GO enrichment terms of (C) TGS-preferred genes and (D) NGS-preferred genes. (E-J) The relationship between different number of detected accessions and (E) CDS DNA transposons coverage, (F) CDS SINEs coverage,

1 (G) CDS LINEs coverage, (H) CDS LTR coverage, (I) CDS RC/Helitron coverage, (J) CDS  
2 satellite coverage. Some NGS-preferred genes have CDS regions fully overlapped with DNA  
3 transposons or LTRs. One side Wilcoxon Rank Sum test (alternative hypothesis: TGS-  
4 preferred genes have higher repeat element coverage in the CDS regions. Adjust method =  
5 “Holm”) was applied to exam which group (TGS preferred genes ( $\Delta$ Accession number  $> 0$ )  
6 or NGS preferred genes ( $\Delta$ Accession number  $< 0$ )) have a higher percentage of CDS  
7 regions covered with repeat elements. (K) The read alignment of a NGS-preferred gene  
8 LOC\_Os05g27600 ( $\Delta$ Accession number = -66) in rice accession QUAN from NGS and  
9 TGS. (L) The read alignment of a TGS-preferred gene LOC\_Os04g31640 ( $\Delta$ Accession  
10 number = 75) in rice accession QUAN from NGS and TGS.  
11

1 **Supplemental Figure S9**

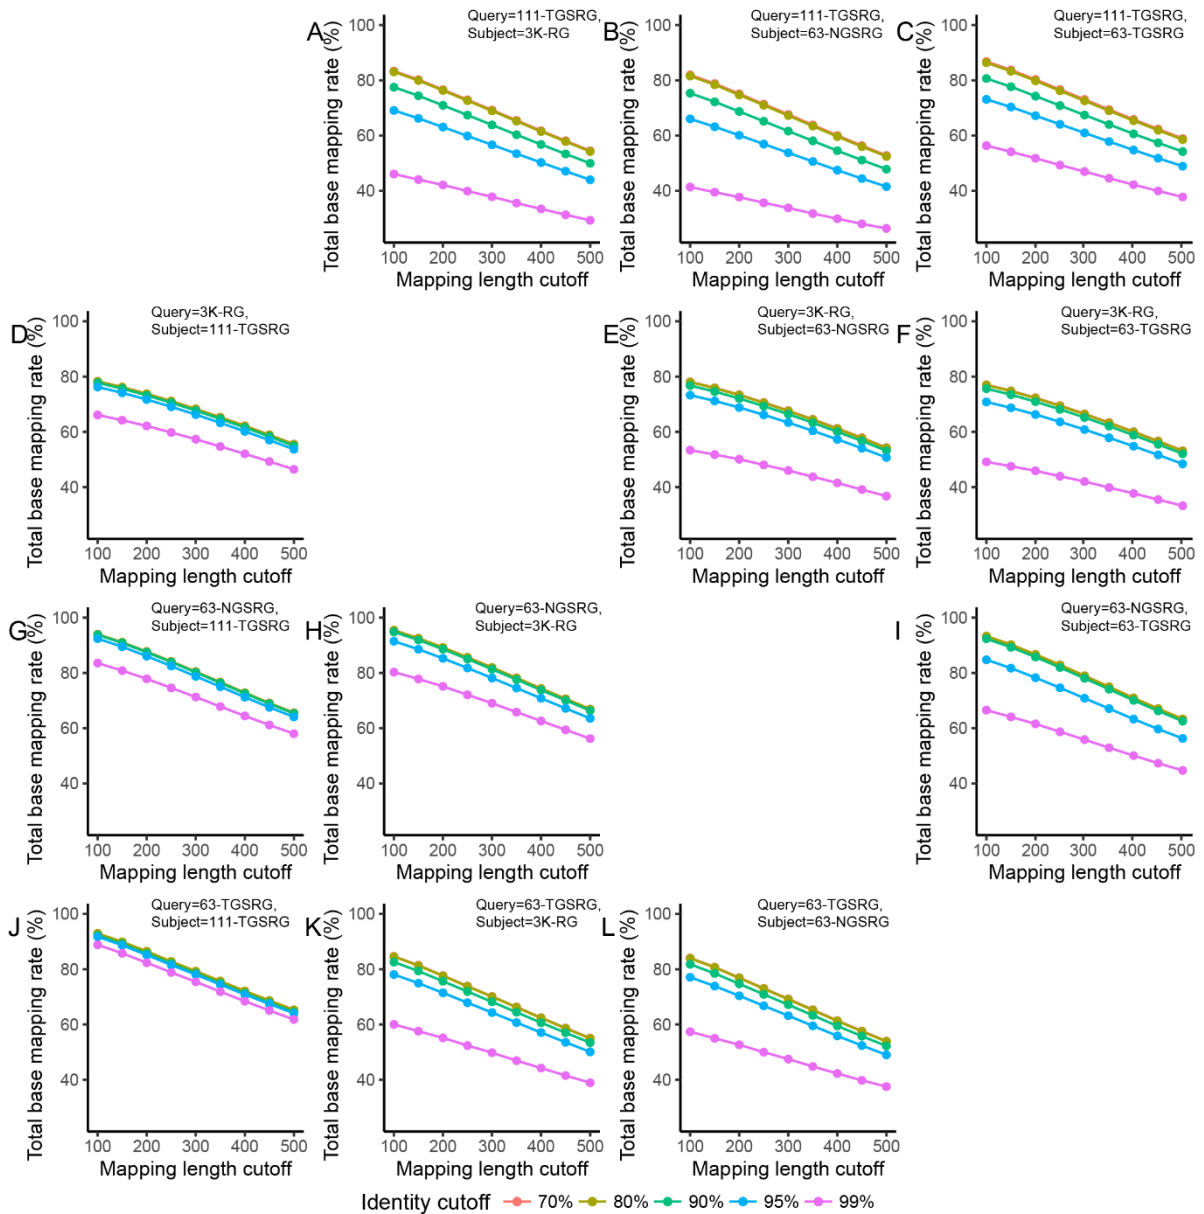

2  
3 **Figure S9.** Overlapping of sequences in pan-genomes derived from 111-TGSRG, 3K-RG,  
4 63-NGSRG, 63-TGSRG. (A-C) 111-TGSRG novel sequences (non-redundant, non-repeat)  
5 mapped to the pan-genome derived from (A) 3K-RG, (B) 63-NGSRG and (C) 63-TGSRG.  
6 (D-F) 3K-RG novel sequences mapped to the pan-genome derived from (D) 111-TGSRG,  
7 (E) 63-NGSRG and (F) 63-TGSRG. (G-I) 63-NGSRG novel sequences mapped to the pan-  
8 genome derived from (G) 111-TGSRG, (H) 3K-RG and (I) 63-TGSRG. (J-L) 63-TGSRG  
9 novel sequences mapped to the pan-genome derived from (J) 111-TGSRG, (K) 3K-RG and  
10 (L) 63-NGSRG.



1 **Supplemental Figure S10**

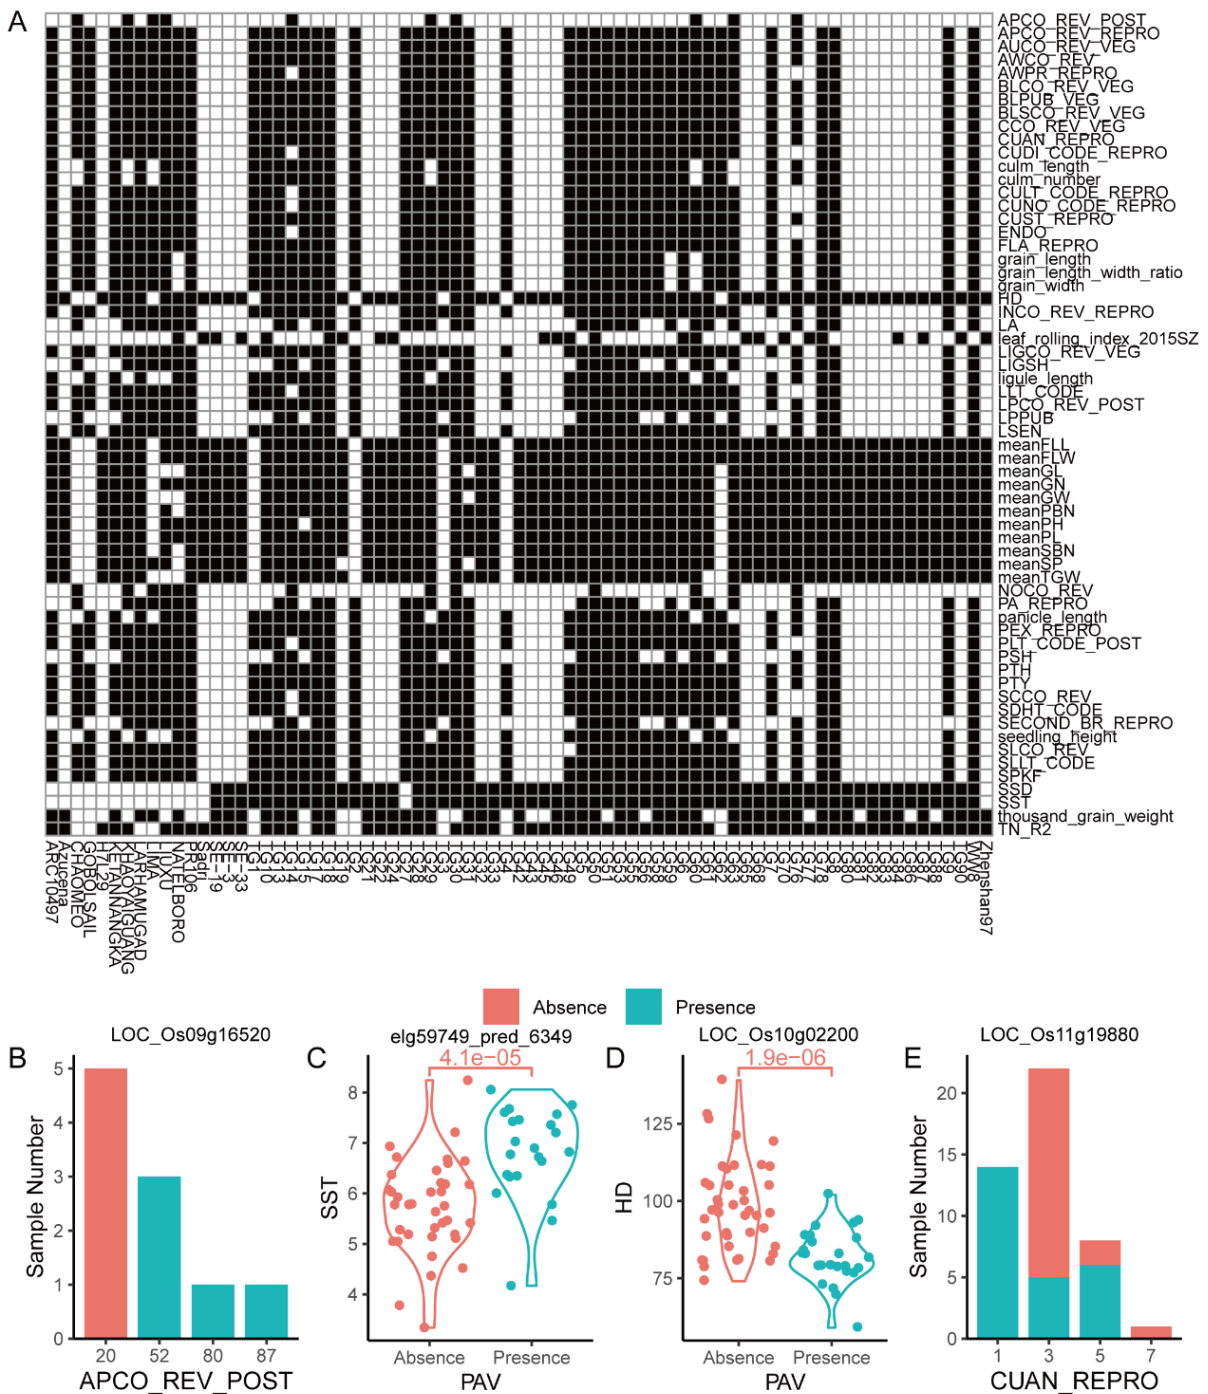

2

3 **Figure S10.** Associations between phenotypes and gene PAVs. (A) The available values  
 4 (black) and the missing values (white) in phenotypes of rice accessions. (B-E) Some  
 5 examples with low p-values but high FDRs. (B) APSCO\_REV\_POST: apiculus color at  
 6 reproductive, 20-straw; 52-brown (tawny); 80-purple; 87-purple apex. LOC\_Os09g16520  
 7 ( $p=8.0 \times 10^{-3}$ ,  $FDR=0.29$ ). (C) SSTS: Score of salt toxicity of leaves. elg59749\_pred\_6349  
 8 ( $p=4.1 \times 10^{-5}$ ,  $FDR=0.77$ ). (D) HD: heading date. LOC\_Os10g02200 ( $p=2.0 \times 10^{-5}$ ,  $FDR=0.07$ ).  
 9 (E) CUNO\_REV\_POST: culm angle at reproductive, 1-erect ( $<15^\circ$ ); 3-semi erect (intermediated



- 1 ~20°); 5-open (~40°); 7-spreading (>60°-80°, culms not resting on the grounds).
- 2 LOC\_Os11g19880 ( $p=2.0 \times 10^{-6}$ , FDR=0.07).
- 3

1 **Supplemental Tables**

2 **Supplemental Table S1**

3 **Table S1.** Summary of sample information from 113 samples of 111 rice accessions. In file  
4 Supplemental\_Table\_S1.xlsx.

5 **Supplemental Table S2**

6 **Table S2.** Summary of raw nanopore sequencing data from 69 cultivated and 6 wild rice  
7 accessions. In file Supplemental\_Table\_S2.xlsx.

8 **Supplemental Table S3**

9 **Table S3.** Summary of raw illumina short reads for 69 cultivated and 6 wild rice accessions.  
10 In file Supplemental\_Table\_S3.xlsx.

11 **Supplemental Table S4**

12 **Table S4.** Summary of assembly metrics from 69+13 cultivated and 6 wild rice accessions.  
13 In file Supplemental\_Table\_S4.xlsx.

14 **Supplemental Table S5**

15 **Table S5.** Summary of sequencing data of 25 rice accessions from public databases. In file  
16 Supplemental\_Table\_S5.xlsx.

17 **Supplemental Table S6**

18 **Table S6.** Summary of gap-filled high-quality reference genomes of rice accessions. In file  
19 Supplemental\_Table\_S6.xlsx.

20 **Supplemental Table S7**

21 **Table S7.** Mapping rates of novel genes to the reference genome and three different pan-  
22 genomes (identity  $\geq$  95%, transcript coverage  $\geq$  95%, all high-scoring segment pairs'  
23 lengths are more than 28bps). In file Supplemental\_Table\_S7.xlsx.

24 **Supplemental Table S8**

25 **Table S8.** Mapping rates of novel gene transcripts to transcripts from different genomes or  
26 pan-genomes (global identity  $\geq$  95%). In file Supplemental\_Table\_S8.xlsx.

1 **Supplemental Table S9**

2 **Table S9.** Mapping rate of novel gene proteins to different proteins of genomes or pan-  
3 genomes (global identity  $\geq 95\%$ ). In file Supplemental\_Table\_S9.xlsx.

4 **Supplemental Table S10**

5 **Table S10.** Mapping rate of novel gene proteins to different proteins of genomes or pan-  
6 genomes (global identity  $\geq 50\%$ ). In file Supplemental\_Table\_S10.xlsx.

7 **Supplemental Table S11**

8 **Table S11.** Association of phenotypes and genes (only results with  $P < 5e-2$  and  $FDR < 5e-2$   
9 are listed). In file Supplemental\_Table\_S11.xlsx.

10

## References

- 1 Alonge M, Soyk S, Ramakrishnan S, Wang X, Goodwin S, Sedlazeck FJ, Lippman ZB,  
2 Schatz MC. 2019. RaGOO: fast and accurate reference-guided scaffolding of draft  
3 genomes. *Genome Biol* **20**: 224.  
4  
5 Bolger AM, Lohse M, Usadel B. 2014. Trimmomatic: a flexible trimmer for Illumina  
6 sequence data. *Bioinformatics* **30**: 2114-2120.  
7  
8 Camacho C, Coulouris G, Avagyan V, Ma N, Papadopoulos J, Bealer K, Madden TL. 2009.  
9 BLAST+: architecture and applications. *BMC Bioinformatics* **10**: 421.  
10  
11 Chikhi R, Medvedev P. 2014. Informed and automated k-mer size selection for genome  
12 assembly. *Bioinformatics* **30**: 31-37.  
13  
14 Chin CS, Peluso P, Sedlazeck FJ, Nattestad M, Concepcion GT, Clum A, Dunn C, O'Malley  
15 R, Figueroa-Balderas R, Morales-Cruz A et al. 2016. Phased diploid genome  
16 assembly with single-molecule real-time sequencing. *Nat Methods* **13**: 1050-1054.  
17  
18 De Coster W, D'Hert S, Schultz DT, Cruts M, Van Broeckhoven C. 2018. NanoPack:  
19 visualizing and processing long-read sequencing data. *Bioinformatics* **34**: 2666-2669.  
20  
21 Kurtz S, Phillippy A, Delcher AL, Smoot M, Shumway M, Antonescu C, Salzberg SL. 2004.  
22 Versatile and open software for comparing large genomes. *Genome Biol* **5**: R12.  
23  
24 Langmead B, Salzberg SL. 2012. Fast gapped-read alignment with Bowtie 2. *Nat Methods* **9**:  
25 357-359.  
26  
27 Li H. 2018. Minimap2: pairwise alignment for nucleotide sequences. *Bioinformatics* **34**:  
28 3094-3100.  
29  
30 Mikheenko A, Prjibelski A, Saveliev V, Antipov D, Gurevich A. 2018. Versatile genome  
31 assembly evaluation with QUAST-LG. *Bioinformatics* **34**: i142-i150.  
32  
33 Seppey M, Manni M, Zdobnov EM. 2019. BUSCO: Assessing Genome Assembly and  
34 Annotation Completeness. *Methods Mol Biol* **1962**: 227-245.  
35  
36 Vaser R, Sovic I, Nagarajan N, Sikic M. 2017. Fast and accurate de novo genome assembly  
37 from long uncorrected reads. *Genome Res* **27**: 737-746.  
38  
39 Walker BJ, Abeel T, Shea T, Priest M, Abouelliel A, Sakthikumar S, Cuomo CA, Zeng Q,  
40 Wortman J, Young SK et al. 2014. Pilon: an integrated tool for comprehensive  
41 microbial variant detection and genome assembly improvement. *PLoS One* **9**:  
42 e112963.  
43  
44 Wang W, Mauleon R, Hu Z, Chebotarov D, Tai S, Wu Z, Li M, Zheng T, Fuentes RR, Zhang  
45 F et al. 2018. Genomic variation in 3,010 diverse accessions of Asian cultivated rice.  
46 *Nature* **557**: 43-49.
