# Supplementary material for: Long-read sequencing of 111 rice genomes reveals significantly larger pan-genomes
Source: HighWire-hosted journal article supplement (doi:10.1101/gr.276015.121), 2022-04-08
Supplement: Supplemental_Table_S1.xlsx [file Supplemental_Table_S1.xlsx]

## Sheet: Sheet1
Supplemental Table S1. Summary of sample information from 113 samples of 111 rice accessions.
SampleID	Platform	Code	Variety Name	K5	K9	Country	Region	3K_RGP	NCBI_Download	Assembly_available
TG1	Nanopore	IRIS_313-8606	AC 13 (T 141)::IRGC 5456-1	Xian	XI-3	India	SAC	Yes	No	No
TG2	Nanopore	IRIS_313-11661	91-382::IRGC 63464-1	GJ	GJ-tmp	Bhutan	SAE	Yes	No	No
TG3	Nanopore	IRIS_313-10870	ARC 11768::IRGC 21630-1	GJ	GJ-sbtrp	India	SAC	Yes	No	No
TG4	Nanopore	IRIS_313-11094	MAK BOUAP::IRGC 30106-3	GJ	GJ-sbtrp	Lao People's Democratic Republic	SEA	Yes	No	No
TG5	Nanopore	IRIS_313-8948	BUCAYAB::IRGC 44357-1	Xian	XI-3	Philippines	SER	Yes	No	No
TG6	Nanopore	IRIS_313-10871	ARC 11777::IRGC 21639-1	cA	cA(Aus)	India	SAC	Yes	No	No
TG7	Nanopore	IRIS_313-10762	BANDI::IRGC 17214-1	Xian	XI-3	Indonesia	SER	Yes	No	No
TG8	Nanopore	IRIS_313-11671	DERAWA::IRGC 64106-1	Xian	XI-2	Nepal	SAC	Yes	No	No
TG9	Nanopore	IRIS_313-11741	HERATH BANDA::IRGC 67630-1	Xian	XI-2	Sri Lanka	IOC	Yes	No	No
TG10	Nanopore	IRIS_313-10968	IH PEN SHIM MING::IRGC 26067-1	Xian	XI-1A	Brazil	SAM	Yes	No	No
TG11	Nanopore	IRIS_313-11027	JHONA 101::IRGC 27976-1	cA	cA(Aus)	Pakistan	SAW	Yes	No	No
TG12	Nanopore	IRIS_313-12094	KASHA::IRGC 83865-1	cB	cB(Bas)	Bangladesh	SAE	Yes	No	No
TG13	Nanopore	IRIS_313-11728	LUO SI ZHAN::IRGC 67211-1	Xian	XI-3	China	EAS	Yes	No	No
TG14	Nanopore	IRIS_313-11736	MALAGKIT (PINELIPE)::IRGC 67444-1	GJ	GJ-trp	Philippines	SER	Yes	No	No
TG15	Nanopore	IRIS_313-11044	BUKU::IRGC 28683-2	GJ	GJ-trp	Malaysia	SER	Yes	No	No
TG16	Nanopore	IRIS_313-11079	PHAN PHAE::IRGC 29652-2	Xian	XI-3	Lao People's Democratic Republic	SEA	Yes	No	No
TG17	Nanopore	IRIS_313-11900	PLE LIA::IRGC 73562-1	GJ	GJ-sbtrp	Thailand	SEA	Yes	No	No
TG18	Nanopore	IRIS_313-11691	SHANGYIPA::IRGC 64928-1	GJ	GJ-sbtrp	Bhutan	SAE	Yes	No	No
TG19	Nanopore	B167	Qingjinzaosheng	GJ	GJ-tmp	Democratic People's Republic of Korea	EAR	Yes	No	No
TG21	Nanopore	B015	Kahamu	Xian	XI-1A	Romania	EUR	Yes	No	No
TG22	Nanopore	B046	Qiutianxiaoting	GJ	GJ-tmp	Japan	EAR	Yes	No	No
TG24	Nanopore	B208	Lucaihao	Xian	XI-1A	China	EAS	Yes	No	No
TG27	Nanopore	IRIS_313-10020	HODARAWALA::IRGC 67631-1	cA	cA(Aus)	Sri Lanka	IOC	Yes	No	No
TG28	Nanopore	IRIS_313-10010	LALKA (LAL DHAN)::IRGC 64946-1	Xian	XI-2	Fiji	OCE	Yes	No	No
TG29	Nanopore	IRIS_313-10097	MAEKJO::IRGC 77666-1	GJ	GJ-tmp	Korea, Republic of	EAR	Yes	No	No
TG30	Nanopore	IRIS_313-8930	MUKKALA BAZAL::IRGC 77279-1	Xian	XI-1B	Bangladesh	SAE	Yes	No	No
TG31	Nanopore	IRIS_313-9470	SAHULO FACHE SOYO::IRGC 66630-1	GJ	GJ-trp	Indonesia	SER	Yes	No	No
TG32	Nanopore	CX106	SAL BUI BAO	GJ	GJ-trp	Viet Nam	SEA	Yes	No	No
TG33	Nanopore	CX107	Tun Sart	Xian	XI-3	Viet Nam	SEA	Yes	No	No
TG34	Nanopore	CX110	UP 15	cB	cB(Bas)	Japan	EAR	Yes	No	No
TG42	Nanopore	CX152	Cisadane	Xian	XI-1B	Indonesia	SER	Yes	No	No
TG43	Nanopore	CX154	Khao Dawk Mali 105	Xian	XI-3	Thailand	SEA	Yes	No	No
TG45	Nanopore	CX270	TAICHUNGNATIVE1	Xian	XI-1A	Chinese Taipei	EAR	Yes	No	No
TG46	Nanopore	CX317	MR 19	GJ	GJ-tmp	Malaysia	SER	Yes	No	No
TG49	Nanopore	IRIS_313-10605	DV 86::IRGC 8840-1	cA	cA(Aus)	Bangladesh	SAE	Yes	No	No
TG50	Nanopore	IRIS_313-11930	ITA 117::IRGC 75235-1	Xian	XI-1B	Nigeria	WAF	Yes	No	No
TG51	Nanopore	IRIS_313-11784	MBEIMBEIHUN::IRGC 69730-1	Xian	XI-1B	Sierra Leone	WAF	Yes	No	No
TG52	Nanopore	IRIS_313-11790	VARIRANGAHY::IRGC 69897-1	GJ	GJ-trp	Madagascar	IOC	Yes	No	No
TG53	Nanopore	IRIS_313-11453	ZINYA KOLAMBA::IRGC 52402-1	Xian	XI-2	India	SAC	Yes	No	No
TG54	Nanopore	IRIS_313-11289	ARC 18578::IRGC 42459-2	cB	cB(Bas)	India	SAC	Yes	No	No
TG55	Nanopore	IRIS_313-11241	BR 116-3B-53::IRGC 39559-2	Xian	XI-2	Bangladesh	SAE	Yes	No	No
TG56	Nanopore	IRIS_313-11151	E 21::IRGC 33929-2	Xian	XI-3	Myanmar	SEA	Yes	No	No
TG58	Nanopore	IRIS_313-10982	LUDI GOCHYA::IRGC 26504-2	Xian	XI-2	Bangladesh	SAE	Yes	No	No
TG59	Nanopore	IRIS_313-11242	OR 117-8::IRGC 39680-2	Xian	XI-2	India	SAC	Yes	No	No
TG60	Nanopore	IRIS_313-11595	AMAKOYALI::IRGC 60878-1	cA	cA(Aus)	India	SAC	Yes	No	No
TG61	Nanopore	IRIS_313-11635	GAM PERNG::IRGC 62135-1	Xian	XI-3	Thailand	SEA	Yes	No	No
TG62	Nanopore	IRIS_313-11112	HIJOL DIGA::IRGC 31655-1	cA	cA(Aus)	Bangladesh	SAE	Yes	No	No
TG63	Nanopore	IRIS_313-12228	SOM::IRGC 92221-1	GJ	GJ-sbtrp	Lao People's Democratic Republic	SEA	Yes	No	No
TG64	Nanopore	IRIS_313-12266	KAUK PAHLING::IRGC 95823-2	GJ	GJ-sbtrp	Myanmar	SEA	Yes	No	No
TG65	Nanopore	B018	American Huangkedao	GJ	GJ-trp	United States of America	NAM	Yes	No	No
TG68	Nanopore	B061	Guangluai 4	Xian	XI-1A	China	EAS	Yes	No	No
TG70	Nanopore	B076	Minbeiwanxian	Xian	XI-adm	China	EAS	Yes	No	No
TG75	Nanopore	B250	Annongwangeng B	GJ	GJ-tmp	China	EAS	Yes	No	No
TG76	Nanopore	IRIS_313-10397	IRGA 318-11-6-9-2B::IRGC 117339-1	Xian	XI-1B	Colombia	SAM	Yes	No	No
TG77	Nanopore	IRIS_313-7808	WAS 173-B-B-6-2-2::C1	Xian	XI-1B	Senegal	WAF	Yes	No	No
TG78	Nanopore	IRIS_313-9032	KHAO GRADOOK CHAHNG::IRGC 17111-1	Xian	XI-1B	Thailand	SEA	Yes	No	No
TG80	Nanopore	CX10	Gang 46B	Xian	XI-1A	China	EAS	Yes	No	No
TG81	Nanopore	CX67	Binam	cB	cB(Bas)	Iran	WAS	Yes	No	No
TG82	Nanopore	CX82	X 21	Xian	XI-1B	Viet Nam	SEA	Yes	No	No
TG83	Nanopore	CX97	Budda	Xian	XI-1B	India	SAC	Yes	No	No
TG84	Nanopore	CX102	Tek Si Chut	Xian	XI-1A	Chinese Taipei	EAR	Yes	No	No
TG85	Nanopore	CX149	Karnal Local	cB	cB(Bas)	India	SAC	Yes	No	No
TG86	Nanopore	CX150	Chorofa	Xian	XI-1B	Philippines	SER-IRRI	Yes	No	No
TG87	Nanopore	CX227	KASALATH	cA	cA(Aus)	India	SAC	Yes	No	No
TG88	Nanopore	CX357	PSBRC 80	Xian	XI-1B	Philippines	SER-IRRI	Yes	No	No
TG90	Nanopore	CX389	Jinyuan 85	GJ	GJ-tmp	China	EAS	Yes	No	No
WW8	Nanopore	IRIS_313-11627	JADO::IRGC 61966-1	cB	cB(Bas)	Nepal	SAC	Yes	No	No
wild12	Nanopore	-	O.rufipogon (collected from Hainan,China)	unknown	unknown	China	EAS	No	No	No
wild65	Nanopore	-	O.rufipogon (collected from Sri Lanka)	unknown	unknown	Sri Lanka	IOC	No	No	No
wild111	Nanopore	-	O.rufipogon (collected from Naypyidaw,Myanmar)	unknown	unknown	Myanmar	SEA	No	No	No
wild131	Nanopore	-	O.rufipogon (collected from Yangon,Myanmar)	unknown	unknown	Myanmar	SEA	No	No	No
wild219	Nanopore	-	O.rufipogon (collected from Fujian,China)	unknown	unknown	China	EAS	No	No	No
wild273	Nanopore	-	O.rufipogon (collected from Guangxi,China)	unknown	unknown	China	EAS	No	No	No
WSSM	Nanopore	-	Wushansimiao	Xian	Xian	China	EAS	No	No	No
QUAN	Nanopore	-	Quan9311	Xian	Xian	China	EAS	No	No	No
H7L1	Pacbio Sequal	-	Huanghuazhan	Xian	Xian	China	EAS	No	No	No
H7L26	Pacbio Sequal	-	CDR22	Xian	Xian	India	SAC	No	No	No
H7L27	Pacbio Sequal	-	PsBRC28	Xian	Xian	Philippines	SER-IRRI	No	No	No
H7L28	Pacbio Sequal	-	PsBRC66	Xian	Xian	Philippines	SER-IRRI	No	No	No
H7L29	Pacbio Sequal	CX403	IR64	Xian	Xian	Philippines	SER-IRRI	No	No	No
H7L30	Pacbio Sequal	-	Teqing	Xian	Xian	China	EAS	No	No	No
H7L31	Pacbio Sequal	-	IR50	Xian	Xian	Philippines	SER-IRRI	No	No	No
H7L32	Pacbio Sequal	-	OM1723	Xian	Xian	Viet Nam	SEA	No	No	No
H7L33	Pacbio Sequal	-	Phalguna	Xian	Xian	India	SAC	No	No	No
SE-3	Nanopore	CX3	BR 24	Xian	XI-1A	Bangladesh	SAC	Yes	No	No
SE-19	Nanopore	CX19	Zhong 413	Xian	XI-adm	China	EAS	Yes	No	No
SE-33	Nanopore	CX34	BG 300	Xian	XI-adm	Sri Lanka	IOC	Yes	No	No
SE-134	Nanopore	SE134	Haonnong	unknown	unknown	China	EAS	No	No	No
HR12	PacBio RS II	-	HR-12	Xian	Xian	India	SAC	No	Yes	Yes
Nagina22	PacBio RS II	-	Nagina 22	cA	aus	India	SAC	No	Yes	Yes
R498	PacBio RS II	-	Shuhui498	Xian	Xian	China	EAS	No	Yes	Yes
Tetep	PacBio RS II	-	Tetep	Xian	Xian	Unknown	Unknown	No	Yes	Yes
CGS	Nanopore	-	Carolina Gold Select	GJ	Geng	United States of America	NAM	No	Yes	Yes
Zhenshan97	PacBio RS II	B156	Zhenshan 97	Xian	XI-1A	China	EAS	No	Yes	Yes
IR8	PacBio RS II	-	IR8	Xian	XI-adm	Philippines	SER-IRRI	No	Yes	Yes
R600	Pacbio Sequal	-	R600	Xian-Geng intermediate	Xian-Geng intermediate	China	EAS	No	Yes	Yes
Basmati	Nanopore	-	Basmati 334	cB	cB(Bas)	Pakistan	SAW	No	Yes	Yes
Sadri	Nanopore	CX104	Dom Sufid	cB	cB(Bas)	Iran	WAS	No	Yes	Yes
IR64	Nanopore	-	IR64	Xian	XI-1B	Philippines	SER-IRRI	No	Yes	Yes
CHAOMEO	Pacbio Sequal	IRIS_313-12029	CHAO MEO::IRGC 80273-1	GJ	GJ-sbtrp	Laos	SEA	No	Yes	Yes
Azucena	Pacbio Sequal	CX151	Azucena	GJ	GJ-trp	Philippines	SEA	No	Yes	Yes
KETANNANGKA	Pacbio Sequal	IRIS_313-10841	KETAN NANGKA::IRGC 19961-2	GJ	GJ-trp	Indonesia	SEA	No	Yes	Yes
ARC10497	Pacbio Sequal	IRIS_313-8813	ARC 10497::IRGC 12485-1	cB	cB(Bas)	India	SAS	No	Yes	Yes
IR64	Pacbio Sequal		IR64	Xian	Xian	Philippines	SER-IRRI	No	Yes	Yes
PR106	Pacbio Sequal	IRIS_313-11480	PR 106::IRGC 53418-1	Xian	XI-1B	India	SAS	No	Yes	Yes
LIMA	Pacbio Sequal	IRIS_313-12048	LIMA::IRGC 81487-1	Xian	XI-3	Indonesia	SEA	No	Yes	Yes
KHAOYAIGUANG	Pacbio Sequal	IRIS_313-11708	KHAO YAI GUANG::IRGC 65972-1	Xian	XI-3	Thailand	SEA	No	Yes	Yes
GOBOLSAIL	Pacbio Sequal	IRIS_313-10985	GOBOL SAIL (BALAM)::IRGC 26624-2	Xian	XI-2	Bangladesh	SAS	No	Yes	Yes
LIUXU	Pacbio Sequal	IRIS_313-10239	LIU XU::IRGC 109232-1	Xian	XI-adm	China	EAS	No	Yes	Yes
LARHAMUGAD	Pacbio Sequal	IRIS_313-8568	LARHA MUGAD::IRGC 52339-1	Xian	XI-2	India	SAS	No	Yes	Yes
NATELBORO	Pacbio Sequal	IRIS_313-11163	NA TEL BORO::IRGC 34749-1	cA	cA(Aus)	Bangladesh	SAS	No	Yes	Yes
Suijing18	Pacbio Sequal	-	Suijing18	GJ	-	China	EAS	No	Yes	Yes
Kitaake	PacBio RS II	-	Kitaake	GJ	-	Japan	EAR	No	Yes	Yes
