# Supplementary material for: Long-read sequencing of 111 rice genomes reveals significantly larger pan-genomes
Source: HighWire-hosted journal article supplement (doi:10.1101/gr.276015.121), 2022-04-08
Supplement: Supplemental_Table_S2.xlsx [file Supplemental_Table_S2.xlsx]

## Sheet: Sheet1
Supplemental Table S2. Summary of raw nanopore sequencing data from 69 cultivated and 6 wild rice accessions.
SampleID	MeanRL	MeanRQ	MedianRL	MedianRQ	NumberR	N50	TotalB	EstimatedDepth	Q5	Q7	Q10	Q12	Q15	hQL1	hQL2	hQL3	hQL4	hQL5	lEQ1	lRQ2	lRQ3	lRQ4	lRQ5
QUAN	21594.8	9.4	18515	9.4	1465418	30686	31645366641	83.2773	1465418(100.0%)31645.4Mb	1465414(100.0%)31645.1Mb	466802(31.9%)9729.7Mb	9604(0.7%)90.8Mb	4(0.0%)0.0Mb	15.8(226)	15.7(189)	15.4(232)	15.2(337)	15.0(251)	194730(7.9)	190640(9.8)	188041(8.2)	174179(7.4)	167499(8.4)
TG1	16204.6	9.1	13633	9.1	1152305	23306	18672585659	49.1384	1152305(100.0%)18672.6Mb	1152305(100.0%)18672.6Mb	217177(18.8%)3174.3Mb	878(0.1%)3.8Mb	0(0.0%)0.0Mb	14.6(225)	14.5(393)	14.2(399)	14.1(304)	14.0(371)	137306(8.0)	134761(8.1)	128166(10.1)	126620(7.9)	126106(8.3)
TG10	15682.9	9.1	13306	9	2348670	22562	36833907146	96.9313	2348670(100.0%)36833.9Mb	2348668(100.0%)36833.7Mb	424375(18.1%)5993.0Mb	2568(0.1%)14.2Mb	0(0.0%)0.0Mb	14.6(220)	14.5(337)	14.3(466)	14.2(820)	14.2(621)	163616(10.8)	153434(8.0)	148644(8.3)	144906(8.3)	142675(10.8)
TG11	18148	9.3	16342	9.3	2269073	24332	41179032339	108.366	2269073(100.0%)41179.0Mb	2269072(100.0%)41179.0Mb	582427(25.7%)9653.8Mb	12404(0.5%)94.7Mb	4(0.0%)0.0Mb	16.1(209)	15.6(347)	15.2(219)	15.0(595)	15.0(519)	178490(8.1)	152872(8.5)	151568(8.4)	149954(10.3)	145087(8.3)
TG12	22555.2	8.8	20568	8.8	2222914	29298	50138206733	131.943	2222914(100.0%)50138.2Mb	2222910(100.0%)50138.0Mb	263749(11.9%)5519.1Mb	448(0.0%)3.2Mb	0(0.0%)0.0Mb	14.0(219)	13.7(372)	13.3(232)	13.3(5470)	13.3(5030)	181729(8.2)	174323(7.8)	173370(9.5)	167897(8.0)	156843(7.7)
TG13	21983.7	8.8	18904	8.8	1509801	29712	33190979252	87.3447	1509801(100.0%)33191.0Mb	1509793(100.0%)33190.5Mb	177900(11.8%)3570.0Mb	352(0.0%)2.7Mb	0(0.0%)0.0Mb	14.0(11588)	13.5(435)	13.4(198)	13.3(216)	13.2(11403)	168233(8.5)	165122(9.3)	164777(7.9)	164563(8.3)	161018(9.0)
TG14	21960.5	9.2	19087	9.2	1065844	29171	23406493303	61.596	1065844(100.0%)23406.5Mb	1065840(100.0%)23406.3Mb	230076(21.6%)4724.1Mb	976(0.1%)8.6Mb	0(0.0%)0.0Mb	14.0(214)	14.0(279)	13.9(186)	13.7(889)	13.7(329)	164669(9.3)	162214(8.9)	149596(9.4)	145739(9.4)	144800(8.0)
TG15	22119.6	9.2	19026	9.2	1198551	29769	26511432719	69.7669	1198551(100.0%)26511.4Mb	1198551(100.0%)26511.4Mb	253457(21.1%)5202.0Mb	1078(0.1%)9.0Mb	0(0.0%)0.0Mb	14.5(193)	14.5(349)	14.4(370)	14.3(191)	14.2(257)	172399(9.4)	168443(10.2)	161275(8.2)	153735(9.2)	150866(7.4)
TG16	21276.2	9.1	18807	9.1	1424556	27337	30309157681	79.7609	1424556(100.0%)30309.2Mb	1424555(100.0%)30309.1Mb	268550(18.9%)5368.8Mb	1222(0.1%)10.5Mb	0(0.0%)0.0Mb	14.2(206)	14.2(932)	13.9(1199)	13.9(267)	13.9(216)	171919(8.0)	169627(7.5)	167991(8.4)	162050(7.7)	160752(7.5)
TG17	21888.1	9	19387	9	1435356	29049	31417221707	82.6769	1435356(100.0%)31417.2Mb	1435350(100.0%)31416.8Mb	255010(17.8%)5241.3Mb	1055(0.1%)9.6Mb	0(0.0%)0.0Mb	14.0(938)	13.9(296)	13.8(1068)	13.8(291)	13.7(1851)	197612(8.9)	194912(9.3)	186865(9.0)	173057(8.9)	166913(8.3)
TG18	15210	9.1	11936	9.1	1527882	25517	23239042910	61.1554	1527882(100.0%)23239.0Mb	1527880(100.0%)23238.9Mb	317961(20.8%)4472.9Mb	2348(0.2%)9.9Mb	0(0.0%)0.0Mb	14.3(269)	14.3(291)	14.1(282)	14.1(483)	14.0(382)	166871(7.9)	164137(8.4)	164022(7.6)	159028(8.2)	141930(8.3)
TG19	21669.2	9	18354	9	905993	29370	19632172900	51.6636	905993(100.0%)19632.2Mb	905991(100.0%)19632.0Mb	159402(17.6%)3137.9Mb	317(0.0%)1.9Mb	0(0.0%)0.0Mb	13.7(308)	13.2(484)	13.2(265)	13.1(269)	13.1(240)	178333(10.2)	163584(8.1)	158315(9.2)	157654(8.3)	157358(8.3)
TG2	20350.4	9	18070	8.9	1614843	27471	32862780491	86.481	1614843(100.0%)32862.8Mb	1614842(100.0%)32862.7Mb	330599(20.5%)6886.5Mb	2871(0.2%)29.0Mb	1(0.0%)0.0Mb	15.4(170)	14.8(219)	14.7(186)	14.6(482)	14.5(491)	230027(8.7)	170930(7.7)	163866(8.6)	162109(8.6)	159057(10.1)
TG21	22026.4	8.9	18949	8.9	1313780	30385	28937822142	76.1522	1313780(100.0%)28937.8Mb	1313776(100.0%)28937.6Mb	187628(14.3%)3690.1Mb	459(0.0%)2.9Mb	0(0.0%)0.0Mb	13.9(483)	13.6(235)	13.6(3933)	13.4(366)	13.4(9429)	213857(7.7)	179730(7.9)	173676(7.9)	169620(7.6)	166524(7.8)
TG22	17225.3	9	13922	9	1432187	27944	24669863053	64.9207	1432187(100.0%)24669.9Mb	1432184(100.0%)24669.7Mb	278500(19.4%)4479.8Mb	2284(0.2%)13.6Mb	0(0.0%)0.0Mb	14.6(178)	14.5(400)	14.2(286)	14.1(267)	14.0(303)	176046(9.2)	163624(9.5)	159072(9.2)	154458(9.0)	151815(7.4)
TG24	20444.9	9	17960	8.9	1428692	27984	29209523070	76.8672	1428692(100.0%)29209.5Mb	1428690(100.0%)29209.4Mb	288383(20.2%)5989.5Mb	2580(0.2%)25.1Mb	0(0.0%)0.0Mb	14.4(277)	14.1(346)	14.1(362)	14.0(304)	13.9(300)	175312(7.2)	166294(9.0)	165332(9.0)	163174(9.5)	157863(8.3)
TG27	17089	9.1	13564	9.1	1098287	27884	18768596754	49.391	1098287(100.0%)18768.6Mb	1098285(100.0%)18768.5Mb	219687(20.0%)3291.4Mb	1171(0.1%)3.6Mb	0(0.0%)0.0Mb	13.8(443)	13.7(519)	13.7(177)	13.6(478)	13.5(8169)	206150(9.0)	178896(8.2)	173277(8.6)	172139(7.4)	167695(7.5)
TG28	19659	9.1	16554	9.1	1481813	27533	29131026209	76.6606	1481813(100.0%)29131.0Mb	1481811(100.0%)29130.9Mb	303977(20.5%)5495.1Mb	1831(0.1%)11.3Mb	1(0.0%)0.0Mb	15.3(217)	14.9(245)	14.3(241)	14.3(255)	13.8(230)	181924(9.2)	178491(9.9)	177653(8.8)	176773(8.7)	171554(9.8)
TG29	15005	9.1	11406	9.1	1865804	25892	27996322966	73.6745	1865804(100.0%)27996.3Mb	1865802(100.0%)27996.2Mb	375270(20.1%)5109.8Mb	2962(0.2%)9.1Mb	0(0.0%)0.0Mb	15.0(241)	14.9(210)	14.8(587)	14.5(276)	14.4(593)	184687(8.7)	173827(7.9)	160629(7.7)	159471(7.9)	159191(7.9)
TG3	15602.6	9.1	13066	9.1	1816649	22170	28344455072	74.5907	1816649(100.0%)28344.5Mb	1816644(100.0%)28344.2Mb	343676(18.9%)4889.8Mb	1230(0.1%)5.3Mb	0(0.0%)0.0Mb	14.4(239)	13.9(390)	13.9(268)	13.9(291)	13.5(479)	139173(8.7)	138026(8.7)	133241(9.0)	131296(7.6)	129953(8.1)
TG30	20746.8	9.1	16933	9.1	1336444	30296	27726872262	72.9655	1336444(100.0%)27726.9Mb	1336442(100.0%)27726.8Mb	267426(20.0%)5015.0Mb	1834(0.1%)9.8Mb	0(0.0%)0.0Mb	14.7(166)	14.6(281)	14.5(556)	14.4(212)	14.4(244)	197698(8.6)	197510(9.0)	186434(9.3)	185614(9.9)	175746(9.1)
TG31	19617.8	9.1	17279	9.1	958697	26313	18807500757	49.4934	958697(100.0%)18807.5Mb	958696(100.0%)18807.4Mb	201315(21.0%)3644.9Mb	2199(0.2%)19.2Mb	0(0.0%)0.0Mb	14.4(272)	14.3(368)	14.2(376)	14.2(277)	14.1(367)	151575(7.5)	144190(9.1)	144018(8.3)	142608(7.1)	141958(7.2)
TG32	20736	9	17489	9	1137290	29103	23582793483	62.06	1137290(100.0%)23582.8Mb	1137290(100.0%)23582.8Mb	230446(20.3%)4380.2Mb	2512(0.2%)21.5Mb	1(0.0%)0.0Mb	15.4(445)	14.6(222)	14.6(246)	14.6(291)	14.4(252)	151514(9.5)	146318(7.6)	138527(7.9)	138011(7.2)	137062(7.3)
TG33	20119.2	9.2	17346	9.2	1285487	27146	25862985171	68.0605	1285487(100.0%)25863.0Mb	1285485(100.0%)25862.9Mb	314395(24.5%)6018.0Mb	3263(0.3%)29.0Mb	0(0.0%)0.0Mb	14.8(247)	14.7(1041)	14.4(476)	14.1(1594)	14.0(316)	157627(8.7)	148777(10.3)	145661(7.7)	141521(7.0)	138795(7.2)
TG34	21135.1	9.3	18065	9.3	1353088	29248	28597710593	75.2571	1353088(100.0%)28597.7Mb	1353087(100.0%)28597.7Mb	368095(27.2%)7469.0Mb	3716(0.3%)32.4Mb	1(0.0%)0.0Mb	15.3(195)	14.6(293)	14.3(269)	14.3(298)	14.3(213)	164497(7.7)	156685(7.8)	154712(9.9)	154612(8.2)	152782(8.9)
TG4	20569.2	8.9	18083	8.9	1079700	27819	22208606332	58.4437	1079700(100.0%)22208.6Mb	1079692(100.0%)22208.1Mb	161273(14.9%)2905.8Mb	591(0.1%)3.4Mb	0(0.0%)0.0Mb	14.4(266)	14.3(469)	14.1(332)	14.1(401)	13.6(347)	184601(9.1)	165094(7.5)	160325(8.4)	156254(9.0)	151923(7.0)
TG42	19566.6	9.3	16772	9.3	1316257	27386	25754655517	67.7754	1316257(100.0%)25754.7Mb	1316256(100.0%)25754.6Mb	352978(26.8%)6605.6Mb	3856(0.3%)31.2Mb	0(0.0%)0.0Mb	14.7(345)	14.7(264)	14.6(279)	14.5(298)	14.4(199)	149407(10.4)	143849(10.1)	143547(7.8)	143405(8.3)	140316(9.5)
TG43	21396.2	9.1	18008	9.1	982615	30704	21024204072	55.3269	982615(100.0%)21024.2Mb	982611(100.0%)21024.0Mb	188645(19.2%)3701.4Mb	1740(0.2%)14.5Mb	0(0.0%)0.0Mb	14.6(265)	14.6(393)	14.3(771)	14.3(210)	14.2(216)	182637(9.4)	182177(8.8)	167837(7.9)	165861(9.0)	159427(9.7)
TG45	20130.6	9.1	16994	9.1	1118698	28668	22520105748	59.2634	1118698(100.0%)22520.1Mb	1118696(100.0%)22520.0Mb	214973(19.2%)3943.0Mb	2011(0.2%)14.8Mb	0(0.0%)0.0Mb	14.8(428)	14.2(395)	14.1(468)	14.1(396)	14.1(271)	180620(8.4)	177533(8.8)	166195(9.5)	161979(7.2)	156684(7.7)
TG46	21351.3	9.2	18269	9.2	1160783	29133	24784175287	65.2215	1160783(100.0%)24784.2Mb	1160782(100.0%)24784.1Mb	273166(23.5%)5455.1Mb	3228(0.3%)34.6Mb	2(0.0%)0.0Mb	15.3(268)	15.3(254)	14.1(424)	14.1(1116)	14.0(511)	174983(8.2)	171986(8.0)	167446(9.1)	157252(8.7)	153125(9.6)
TG49	22033.8	9.3	19327	9.3	1409146	29886	31048905565	81.7076	1409146(100.0%)31048.9Mb	1409140(100.0%)31048.6Mb	370034(26.3%)7862.1Mb	5704(0.4%)66.7Mb	1(0.0%)0.0Mb	15.6(222)	14.9(189)	14.9(223)	14.7(346)	14.5(247)	213166(7.6)	210554(8.2)	172559(8.3)	170492(8.4)	166354(7.9)
TG5	21289	8.9	18974	8.8	1230486	28279	26195860871	68.9365	1230486(100.0%)26195.9Mb	1230483(100.0%)26195.7Mb	176442(14.3%)3314.2Mb	631(0.1%)3.2Mb	0(0.0%)0.0Mb	14.0(222)	14.0(260)	13.9(224)	13.7(410)	13.7(459)	179500(9.8)	177664(7.8)	171120(8.7)	170388(7.6)	163841(8.6)
TG50	20979.8	9.2	18467	9.2	1330506	28693	27913801221	73.4574	1330506(100.0%)27913.8Mb	1330502(100.0%)27913.6Mb	307433(23.1%)6049.1Mb	1732(0.1%)12.1Mb	0(0.0%)0.0Mb	14.3(1006)	14.1(219)	14.0(397)	14.0(348)	13.9(187)	211290(8.9)	186348(8.0)	170453(9.8)	165864(7.6)	156063(8.0)
TG51	21801.5	9.2	18144	9.2	1200480	29971	26172237482	68.8743	1200480(100.0%)26172.2Mb	1200475(100.0%)26171.9Mb	262067(21.8%)5324.3Mb	1198(0.1%)10.2Mb	0(0.0%)0.0Mb	14.1(188)	13.9(315)	13.9(221)	13.7(224)	13.6(536)	214371(8.2)	187893(8.4)	185185(7.2)	180340(7.5)	174116(7.8)
TG52	22365	9.1	19025	9.1	824183	30446	18432830245	48.5074	824183(100.0%)18432.8Mb	824182(100.0%)18432.8Mb	162729(19.7%)3343.9Mb	817(0.1%)5.4Mb	0(0.0%)0.0Mb	14.5(351)	14.3(267)	14.2(255)	14.1(380)	13.9(220)	227129(8.2)	212477(7.1)	176357(7.6)	174864(7.5)	165677(10.5)
TG53	22458.5	9	18764	9	1222179	31439	27448288611	72.2323	1222179(100.0%)27448.3Mb	1222172(100.0%)27447.9Mb	210110(17.2%)4266.1Mb	813(0.1%)5.0Mb	0(0.0%)0.0Mb	14.4(231)	14.1(339)	13.9(777)	13.9(182)	13.8(339)	235923(8.2)	184272(7.8)	176246(8.1)	174876(8.3)	167280(8.5)
TG54	22716.3	9.3	19724	9.3	1156185	31781	26264231805	69.1164	1156185(100.0%)26264.2Mb	1156176(100.0%)26263.7Mb	321423(27.8%)7165.2Mb	2649(0.2%)23.3Mb	2(0.0%)0.0Mb	15.1(222)	15.1(234)	14.4(197)	14.3(225)	14.1(236)	227726(9.3)	187862(10.0)	185161(8.8)	180535(8.0)	179386(8.0)
TG55	23542.3	9	20698	9	872335	31805	20536772094	54.0441	872335(100.0%)20536.8Mb	872334(100.0%)20536.7Mb	150903(17.3%)3229.8Mb	552(0.1%)3.5Mb	0(0.0%)0.0Mb	14.3(191)	14.3(181)	14.1(574)	13.9(215)	13.9(222)	180811(9.0)	169507(9.9)	168029(11.0)	166768(9.6)	163985(7.9)
TG56	22931.9	9.3	18875	9.3	1140327	33716	26149814793	68.8153	1140327(100.0%)26149.8Mb	1140323(100.0%)26149.6Mb	309545(27.1%)6935.6Mb	2784(0.2%)22.0Mb	0(0.0%)0.0Mb	14.9(225)	14.1(470)	14.0(1385)	13.9(1179)	13.9(299)	273011(8.5)	207652(8.0)	201025(8.5)	195805(10.0)	195525(8.0)
TG58	21998.1	9.4	19991	9.4	1144911	29439	25185813100	66.2785	1144911(100.0%)25185.8Mb	1144910(100.0%)25185.8Mb	343632(30.0%)7397.7Mb	2578(0.2%)22.1Mb	1(0.0%)0.0Mb	15.0(393)	14.7(409)	14.6(529)	14.4(273)	14.4(190)	163208(10.5)	157172(8.3)	157158(7.9)	150843(9.4)	150027(10.8)
TG59	22623.2	9.4	20282	9.4	1190305	30129	26928464475	70.8644	1190305(100.0%)26928.5Mb	1190301(100.0%)26928.2Mb	361572(30.4%)7871.8Mb	2466(0.2%)18.4Mb	0(0.0%)0.0Mb	14.4(182)	14.1(419)	14.1(1286)	14.0(345)	14.0(582)	232740(9.7)	199806(8.9)	198413(8.2)	184272(8.4)	182523(8.2)
TG6	20106.1	9	17389	9	1942628	28415	39058764726	102.786	1942628(100.0%)39058.8Mb	1942619(100.0%)39058.3Mb	363761(18.7%)6696.7Mb	2018(0.1%)10.4Mb	1(0.0%)0.0Mb	15.6(199)	14.5(213)	14.4(317)	14.3(404)	14.2(274)	198077(8.8)	188519(7.3)	170117(9.6)	160484(8.2)	160263(8.4)
TG60	20955.8	9.4	18893	9.5	1959850	27698	41070266520	108.08	1959850(100.0%)41070.3Mb	1959849(100.0%)41070.2Mb	621454(31.7%)12599.0Mb	4455(0.2%)39.9Mb	0(0.0%)0.0Mb	14.7(279)	14.3(233)	14.0(317)	14.0(322)	13.9(358)	173286(8.9)	170785(10.1)	153098(10.2)	145514(9.3)	142419(9.0)
TG61	19047.5	9.3	15602	9.3	1206267	27687	22976375489	60.4641	1206267(100.0%)22976.4Mb	1206266(100.0%)22976.4Mb	334397(27.7%)6441.7Mb	2318(0.2%)16.5Mb	0(0.0%)0.0Mb	14.6(206)	14.4(162)	14.2(297)	14.2(356)	14.1(205)	200638(9.5)	173386(8.7)	164571(10.4)	163965(8.6)	157889(8.0)
TG62	19220.3	9.3	16299	9.4	1164997	27474	22391586901	58.9252	1164997(100.0%)22391.6Mb	1164996(100.0%)22391.5Mb	333134(28.6%)6454.1Mb	2413(0.2%)19.5Mb	1(0.0%)0.0Mb	15.3(267)	14.0(242)	14.0(236)	13.9(507)	13.8(353)	177586(11.6)	170544(8.8)	165133(8.9)	153355(9.3)	148671(9.1)
TG63	19390.2	9.3	16124	9.4	1044642	27679	20255867831	53.3049	1044642(100.0%)20255.9Mb	1044640(100.0%)20255.7Mb	297998(28.5%)5641.2Mb	2312(0.2%)17.5Mb	1(0.0%)0.0Mb	15.3(243)	14.0(448)	14.0(1017)	14.0(907)	14.0(172)	208776(7.1)	185120(8.1)	175152(8.1)	168480(9.9)	165666(10.4)
TG64	19951.9	9.3	16924	9.3	1044488	28394	20839546441	54.8409	1044488(100.0%)20839.5Mb	1044486(100.0%)20839.4Mb	266261(25.5%)5065.5Mb	2277(0.2%)14.8Mb	1(0.0%)0.0Mb	15.2(242)	14.9(296)	14.6(328)	14.5(339)	14.3(427)	223142(8.6)	195385(8.2)	179444(8.5)	172427(8.8)	169040(8.1)
TG65	19352.7	8.9	16384	8.9	1745140	26582	33773224028	88.8769	1745140(100.0%)33773.2Mb	1745139(100.0%)33773.2Mb	235548(13.5%)4118.3Mb	452(0.0%)1.7Mb	0(0.0%)0.0Mb	14.9(328)	13.9(245)	13.9(253)	13.8(191)	13.7(213)	207519(7.9)	191224(8.2)	182968(8.1)	172959(7.7)	172615(10.6)
TG68	21701.1	9.2	18832	9.2	1541787	31055	33458447254	88.0485	1541787(100.0%)33458.4Mb	1541782(100.0%)33458.2Mb	379086(24.6%)7890.4Mb	2993(0.2%)20.7Mb	1(0.0%)0.0Mb	15.7(9226)	14.5(219)	14.5(179)	14.4(40659)	14.1(212)	205289(9.0)	201875(7.2)	194150(7.9)	182105(8.0)	173626(8.1)
TG7	21007.7	9.2	18451	9.2	1458759	28996	30645134428	80.6451	1458759(100.0%)30645.1Mb	1458757(100.0%)30645.0Mb	336939(23.1%)6775.6Mb	1707(0.1%)12.0Mb	0(0.0%)0.0Mb	14.1(190)	14.0(194)	13.9(27817)	13.8(297)	13.7(1492)	180594(9.2)	163734(7.4)	159990(7.7)	158042(7.2)	150831(8.3)
TG70	15710.6	9.2	10926	9.2	1182677	28711	18580543952	48.8962	1182677(100.0%)18580.5Mb	1182674(100.0%)18580.4Mb	296140(25.0%)4836.6Mb	3698(0.3%)24.4Mb	1(0.0%)0.0Mb	15.0(191)	14.9(324)	14.5(509)	14.2(245)	14.1(659)	202443(8.0)	180668(8.5)	166055(8.5)	165123(9.0)	164703(9.3)
TG75	20047.5	9	16709	9	1144257	28454	22939526140	60.3672	1144257(100.0%)22939.5Mb	1144253(100.0%)22939.3Mb	207131(18.1%)3750.8Mb	497(0.0%)2.3Mb	0(0.0%)0.0Mb	13.8(560)	13.6(384)	13.5(800)	13.3(446)	13.3(530)	173948(7.3)	162029(8.9)	161024(9.1)	158883(7.1)	158332(10.3)
TG76	20751.5	9	17605	9	1231173	29024	25548723151	67.2335	1231173(100.0%)25548.7Mb	1231170(100.0%)25548.6Mb	219997(17.9%)4164.7Mb	538(0.0%)2.2Mb	0(0.0%)0.0Mb	14.4(298)	14.0(336)	13.9(249)	13.7(275)	13.6(469)	181182(8.3)	178384(8.9)	173116(9.4)	172077(8.6)	171587(7.8)
TG77	20789	9.1	18168	9.1	1332467	28609	27700711276	72.8966	1332467(100.0%)27700.7Mb	1332458(100.0%)27700.2Mb	265419(19.9%)5295.1Mb	548(0.0%)2.4Mb	0(0.0%)0.0Mb	14.0(300)	13.8(166)	13.8(326)	13.8(219)	13.6(500)	179064(9.8)	175310(8.4)	175085(7.5)	172635(7.6)	171495(9.0)
TG78	22261.2	8.8	18021	8.8	933655	32460	20784312319	54.6956	933655(100.0%)20784.3Mb	933647(100.0%)20783.8Mb	117493(12.6%)2306.8Mb	336(0.0%)1.4Mb	0(0.0%)0.0Mb	14.8(383)	14.4(238)	14.2(187)	13.9(321)	13.8(967)	207376(7.7)	192865(9.1)	178216(8.1)	175822(8.6)	172883(7.8)
TG8	20023.1	9.2	17305	9.2	1098238	27067	21990091805	57.8687	1098238(100.0%)21990.1Mb	1098238(100.0%)21990.1Mb	257537(23.5%)4894.5Mb	1254(0.1%)10.3Mb	0(0.0%)0.0Mb	14.1(443)	14.0(403)	13.7(731)	13.6(248)	13.5(569)	198234(8.2)	165309(8.6)	151629(8.2)	151368(9.4)	150772(9.8)
TG80	19794.3	8.8	16677	8.8	1108663	27729	21945263099	57.7507	1108663(100.0%)21945.3Mb	1108658(100.0%)21945.0Mb	137706(12.4%)2421.1Mb	337(0.0%)1.2Mb	0(0.0%)0.0Mb	13.8(320)	13.6(332)	13.5(951)	13.4(215)	13.3(258)	196031(7.0)	184466(7.6)	181624(8.4)	173565(9.9)	173417(8.6)
TG81	19503.9	9.4	16448	9.4	1087853	27488	21217373666	55.8352	1087853(100.0%)21217.4Mb	1087853(100.0%)21217.4Mb	339165(31.2%)6475.9Mb	4703(0.4%)43.1Mb	0(0.0%)0.0Mb	14.6(213)	14.5(376)	14.2(236)	14.1(303)	14.0(969)	170580(8.3)	169238(8.2)	161032(8.3)	158234(8.5)	156361(9.1)
TG82	16569.1	9.4	12808	9.4	1373554	24539	22758503005	59.8908	1373554(100.0%)22758.5Mb	1373551(100.0%)22758.4Mb	439583(32.0%)6962.6Mb	6454(0.5%)45.6Mb	2(0.0%)0.0Mb	15.6(219)	15.1(394)	14.8(260)	14.8(237)	14.3(554)	155844(8.8)	149204(9.1)	146662(8.1)	145349(9.5)	143436(9.3)
TG83	19109.3	9.6	15805	9.6	1167886	26792	22317434209	58.7301	1167886(100.0%)22317.4Mb	1167884(100.0%)22317.3Mb	429295(36.8%)7958.5Mb	5824(0.5%)56.6Mb	1(0.0%)0.0Mb	15.2(491)	14.9(233)	14.9(197)	14.4(173)	14.3(3557)	179674(8.8)	174790(8.5)	171900(8.4)	162528(9.7)	161212(7.9)
TG84	20264	9.6	16786	9.7	1135697	28781	23013786368	60.5626	1135697(100.0%)23013.8Mb	1135694(100.0%)23013.6Mb	435574(38.4%)8621.4Mb	4908(0.4%)43.1Mb	0(0.0%)0.0Mb	14.7(208)	14.5(265)	14.4(225)	14.4(411)	14.4(207)	187609(9.9)	164827(7.9)	163429(10.4)	159108(8.2)	158243(10.1)
TG85	24418	8.6	21729	8.6	770787	33169	18821092967	49.5292	770787(100.0%)18821.1Mb	770782(100.0%)18820.8Mb	57715(7.5%)1223.9Mb	67(0.0%)0.1Mb	0(0.0%)0.0Mb	13.5(322)	13.2(219)	12.9(1210)	12.9(548)	12.8(543)	196627(7.7)	188967(9.2)	175062(9.4)	174362(7.6)	173574(9.5)
TG86	23728	8.6	21312	8.6	782171	32039	18559358621	48.8404	782171(100.0%)18559.4Mb	782165(100.0%)18559.0Mb	57904(7.4%)1195.8Mb	63(0.0%)0.1Mb	0(0.0%)0.0Mb	13.5(352)	13.5(193)	13.5(552)	13.4(354)	13.4(214)	186410(8.5)	180354(8.2)	179963(9.6)	173080(8.9)	169002(9.3)
TG87	19243.4	9.1	16900	9.1	1100611	26451	21179506048	55.7355	1100611(100.0%)21179.5Mb	1100609(100.0%)21179.4Mb	221700(20.1%)3993.8Mb	1683(0.2%)12.3Mb	1(0.0%)0.0Mb	15.1(173)	14.2(498)	14.0(277)	13.9(359)	13.9(970)	196461(10.2)	175611(7.7)	167437(8.4)	163728(10.5)	151643(8.7)
TG88	19054.3	9.1	15947	9	1002909	26894	19109704393	50.2887	1002909(100.0%)19109.7Mb	1002908(100.0%)19109.6Mb	191701(19.1%)3400.3Mb	1400(0.1%)10.2Mb	0(0.0%)0.0Mb	14.3(185)	14.1(319)	13.9(794)	13.8(206)	13.8(749)	181815(8.1)	170360(8.0)	161776(7.8)	158839(9.8)	157230(8.8)
TG9	20376.6	9	18218	9	2093141	26598	42651026100	112.24	2093141(100.0%)42651.0Mb	2093135(100.0%)42650.7Mb	348557(16.7%)6707.0Mb	1466(0.1%)11.3Mb	0(0.0%)0.0Mb	14.1(419)	13.9(312)	13.9(927)	13.8(241)	13.7(333)	201052(10.0)	172820(8.4)	162736(9.2)	150958(8.2)	148295(9.6)
TG90	17932.6	9	15489	9	1189266	25136	21326593934	56.1226	1189266(100.0%)21326.6Mb	1189265(100.0%)21326.5Mb	182219(15.3%)2982.1Mb	419(0.0%)1.7Mb	0(0.0%)0.0Mb	14.1(293)	14.1(329)	13.8(730)	13.6(276)	13.6(434)	175501(8.3)	174036(9.2)	173273(9.7)	168342(8.0)	154262(7.5)
wild111	20470	8.8	18691	8.8	886133	26841	18139105828	47.7345	886133(100.0%)18139.1Mb	886131(100.0%)18139.0Mb	100460(11.3%)1820.8Mb	156(0.0%)1.0Mb	0(0.0%)0.0Mb	13.4(240)	13.3(355)	13.2(205)	12.9(209)	12.9(1090)	149821(8.4)	147690(7.6)	144806(9.6)	141083(7.8)	140109(7.8)
wild12	20514.6	9	17491	9	902569	28976	18515849477	48.7259	902569(100.0%)18515.8Mb	902565(100.0%)18515.6Mb	161665(17.9%)3022.5Mb	676(0.1%)3.4Mb	0(0.0%)0.0Mb	14.1(191)	14.0(190)	13.7(202)	13.7(343)	13.7(476)	232208(8.0)	199776(7.5)	193333(8.8)	191389(8.8)	180624(8.9)
wild131	20631.7	8.7	17570	8.7	898247	28730	18532404393	48.7695	898247(100.0%)18532.4Mb	898243(100.0%)18532.2Mb	93450(10.4%)1679.2Mb	197(0.0%)1.0Mb	0(0.0%)0.0Mb	14.5(245)	13.6(341)	13.6(272)	13.3(235)	13.1(557)	185395(7.9)	168708(8.0)	156491(7.8)	156037(8.8)	154832(7.3)
wild219	22230.7	9.6	19279	9.7	1363588	30199	30313538570	79.7725	1363588(100.0%)30313.5Mb	1363585(100.0%)30313.4Mb	534817(39.2%)11665.3Mb	12053(0.9%)153.5Mb	0(0.0%)0.0Mb	14.9(727)	14.6(230)	14.5(398)	14.4(340)	14.3(1174)	187975(8.6)	181660(9.9)	163538(8.9)	163340(9.4)	162509(8.4)
wild273	20956	9.7	18061	9.7	1248259	28610	26158495894	68.8381	1248259(100.0%)26158.5Mb	1248258(100.0%)26158.4Mb	497031(39.8%)10093.2Mb	11594(0.9%)134.0Mb	1(0.0%)0.0Mb	16.2(208)	14.6(315)	14.4(473)	14.3(312)	14.3(2490)	194996(9.6)	178269(8.3)	175299(8.8)	160857(8.8)	155715(10.7)
wild65	20992.1	9.1	18347	9.1	971535	29235	20394556224	53.6699	971535(100.0%)20394.6Mb	971530(100.0%)20394.3Mb	185748(19.1%)3588.6Mb	867(0.1%)4.3Mb	0(0.0%)0.0Mb	14.6(200)	14.6(203)	14.4(232)	14.3(455)	13.9(241)	177706(9.4)	165468(7.3)	158757(7.5)	156312(7.7)	155756(8.6)
WSSM	21230.1	9.5	17970	9.5	1799175	30464	38196742929	100.518	1799175(100.0%)38196.7Mb	1799171(100.0%)38196.5Mb	595133(33.1%)12084.8Mb	12958(0.7%)125.9Mb	10(0.0%)0.0Mb	16.6(189)	16.5(188)	15.7(261)	15.6(463)	15.5(206)	204217(9.6)	195662(8.9)	186166(9.3)	183791(7.6)	183095(9.3)
WW8	18411	9	15509	9	1291473	26407	23777343436	62.572	1291473(100.0%)23777.3Mb	1291470(100.0%)23777.3Mb	199074(15.4%)3309.1Mb	466(0.0%)1.9Mb	0(0.0%)0.0Mb	14.3(224)	13.8(365)	13.3(235)	13.2(369)	13.1(784)	171428(8.9)	166247(8.7)	155877(8.1)	154434(7.9)	151878(8.9)
								68.7082
* MeanRL: Mean read length
* MeanRQ: Mean read quality
* MedianRL: Median read length
* MedianRQ: Median read quality
* NumberR: Number of reads
* N50: Read length N50 （Kb）
* TotalB: Total bases
* Number, percentage and megabases of reads above quality cutoffs (Q5,Q7,Q10,Q12,Q15 stands for quality values above 5, 7, 10,12 and 15 respectively)
* Top 5 highest mean basecall quality scores and their read lengths (hQL1~5)
* Top 5 longest reads and their mean basecall quality score (IRQ1~5)
