# Supplementary material for: Long-read sequencing of 111 rice genomes reveals significantly larger pan-genomes
Source: HighWire-hosted journal article supplement (doi:10.1101/gr.276015.121), 2022-04-08
Supplement: Supplemental_Table_S3.xlsx [file Supplemental_Table_S3.xlsx]

## Sheet: Sheet1
Supplemental Table S3. Summary of raw illumina short reads for 69 cultivated and 6 wild rice accessions.
Sample	File	Total_read_base	Estimated_depth	Total_read_number	Percent_gc	avg_read_length
QUAN	D1910260A-QJ_L4_306306.R1	9992826300	26.2969	66618842	43	150
QUAN	D1910260A-QJ_L4_306306.R2	9992826300	26.2969	66618842	43	150
wild219	D1908462A-ZJ_L1_132132.R1	10019944200	26.3683	66799628	43	150
wild219	D1908462A-ZJ_L1_132132.R2	10019944200	26.3683	66799628	43	150
TG6	D1908384A-WH_L2_115115.R1	10229197950	26.9189	68194653	42	150
TG6	D1908384A-WH_L2_115115.R2	10229197950	26.9189	68194653	43	150
TG5	D1908383A-WH_L2_116116.R1	10248343350	26.9693	68322289	43	150
TG5	D1908383A-WH_L2_116116.R2	10248343350	26.9693	68322289	43	150
TG14	D1908392A-ZJ_L2_107107.R1	10426711500	27.4387	69511410	43	150
TG14	D1908392A-ZJ_L2_107107.R2	10426711500	27.4387	69511410	43	150
TG3	D1908381A-ZXX_L2_118118.R1	10450043850	27.5001	69666959	43	150
TG3	D1908381A-ZXX_L2_118118.R2	10450043850	27.5001	69666959	43	150
TG17	D1908395A-ZXX_L3_175175.R1	10455737850	27.5151	69704919	43	150
TG17	D1908395A-ZXX_L3_175175.R2	10455737850	27.5151	69704919	43	150
TG86	D1908453A-QJ_L1_141141.R1	10467645600	27.5464	69784304	43	150
TG86	D1908453A-QJ_L1_141141.R2	10467645600	27.5464	69784304	43	150
TG4	D1908382A-WH_L2_117117.R1	10500100500	27.6318	70000670	42	150
TG4	D1908382A-WH_L2_117117.R2	10500100500	27.6318	70000670	42	150
WW8	D1908457A-WH_L1_137137.R1	10514261700	27.6691	70095078	43	150
WW8	D1908457A-WH_L1_137137.R2	10514261700	27.6691	70095078	43	150
TG59	D1908427A-QJ_L2_164164.R1	10589340600	27.8667	70595604	42	150
TG59	D1908427A-QJ_L2_164164.R2	10589340600	27.8667	70595604	42	150
wild131	D1908461A-ZJ_L1_133133.R1	10597905000	27.8892	70652700	44	150
wild131	D1908461A-ZJ_L1_133133.R2	10597905000	27.8892	70652700	44	150
TG58	D1908426A-QJ_L2_166166.R1	10601007900	27.8974	70673386	43	150
TG58	D1908426A-QJ_L2_166166.R2	10601007900	27.8974	70673386	43	150
TG87	D1908454A-LJ_L1_140140.R1	10652390100	28.0326	71015934	43	150
TG87	D1908454A-LJ_L1_140140.R2	10652390100	28.0326	71015934	43	150
TG12	D1908390A-LJ_L2_109109.R1	10834927500	28.513	72232850	42	150
TG12	D1908390A-LJ_L2_109109.R2	10834927500	28.513	72232850	42	150
TG83	D1908450A-ZJ_L1_144144.R1	10909944150	28.7104	72732961	42	150
TG83	D1908450A-ZJ_L1_144144.R2	10909944150	28.7104	72732961	43	150
TG55	D1908424A-XH_L4_176176.R1	11086639800	29.1754	73910932	42	150
TG55	D1908424A-XH_L4_176176.R2	11086639800	29.1754	73910932	42	150
wild12	D1908458A-WH_L1_136136.R1	11096663550	29.2017	73977757	43	150
wild12	D1908458A-WH_L1_136136.R2	11096663550	29.2017	73977757	44	150
wild111	D1908460A-XH_L1_134134.R1	11105314800	29.2245	74035432	43	150
wild111	D1908460A-XH_L1_134134.R2	11105314800	29.2245	74035432	43	150
TG15	D1908393A-ZJ_L2_106106.R1	11113898850	29.2471	74092659	42	150
TG15	D1908393A-ZJ_L2_106106.R2	11113898850	29.2471	74092659	42	150
wild273	D1908463A-ZJ_L1_131131.R1	11129769600	29.2889	74198464	43	150
wild273	D1908463A-ZJ_L1_131131.R2	11129769600	29.2889	74198464	44	150
TG18	D1908396A-XH_L3_174174.R1	11215037100	29.5133	74766914	42	150
TG18	D1908396A-XH_L3_174174.R2	11215037100	29.5133	74766914	42	150
TG1	D1908379A-ZXX_L4_304304.R1	11228731200	29.5493	74858208	43	150
TG1	D1908379A-ZXX_L4_304304.R2	11228731200	29.5493	74858208	43	150
TG76	D1908444A-LJ_L4_155155.R1	11429540550	30.0777	76196937	42	150
TG76	D1908444A-LJ_L4_155155.R2	11429540550	30.0777	76196937	42	150
TG16	D1908394A-ZXX_L2_105105.R1	11478564900	30.2067	76523766	43	150
TG16	D1908394A-ZXX_L2_105105.R2	11478564900	30.2067	76523766	43	150
TG19	D1908397A-ZJ_L3_173173.R1	11496816450	30.2548	76645443	42	150
TG19	D1908397A-ZJ_L3_173173.R2	11496816450	30.2548	76645443	43	150
TG78	D1908446A-XZ_L4_153153.R1	11586645150	30.4912	77244301	43	150
TG78	D1908446A-XZ_L4_153153.R2	11586645150	30.4912	77244301	43	150
TG81	D1908448A-WH_L1_149149.R1	11592151500	30.5057	77281010	43	150
TG81	D1908448A-WH_L1_149149.R2	11592151500	30.5057	77281010	43	150
TG63	D1908431A-WH_L4_160160.R1	11625090150	30.5923	77500601	42	150
TG63	D1908431A-WH_L4_160160.R2	11625090150	30.5923	77500601	42	150
TG80	D1908447A-WH_L1_150150.R1	11628337350	30.6009	77522249	43	150
TG80	D1908447A-WH_L1_150150.R2	11628337350	30.6009	77522249	43	150
TG8	D1908386A-XH_L2_113113.R1	11640045450	30.6317	77600303	43	150
TG8	D1908386A-XH_L2_113113.R2	11640045450	30.6317	77600303	43	150
TG84	D1908451A-QJ_L1_143143.R1	11648268600	30.6533	77655124	43	150
TG84	D1908451A-QJ_L1_143143.R2	11648268600	30.6533	77655124	43	150
TG13	D1908391A-ZJ_L2_108108.R1	11663718600	30.694	77758124	42	150
TG13	D1908391A-ZJ_L2_108108.R2	11663718600	30.694	77758124	43	150
wild65	D1908459A-XH_L1_135135.R1	11672920350	30.7182	77819469	43	150
wild65	D1908459A-XH_L1_135135.R2	11672920350	30.7182	77819469	43	150
TG90	D1908456A-ZJ_L1_138138.R1	11693713950	30.7729	77958093	43	150
TG90	D1908456A-ZJ_L1_138138.R2	11693713950	30.7729	77958093	43	150
TG82	D1908449A-ZJ_L2_148148.R1	11723639550	30.8517	78157597	43	150
TG82	D1908449A-ZJ_L2_148148.R2	11723639550	30.8517	78157597	43	150
TG9	D1908387A-XH_L2_112112.R1	11749918800	30.9208	78332792	42	150
TG9	D1908387A-XH_L2_112112.R2	11749918800	30.9208	78332792	43	150
TG60	D1908428A-ZJ_L2_163163.R1	11776042500	30.9896	78506950	42	150
TG60	D1908428A-ZJ_L2_163163.R2	11776042500	30.9896	78506950	42	150
TG50	D1908419A-LJ_L4_184184.R1	11823464400	31.1144	78823096	42	150
TG50	D1908419A-LJ_L4_184184.R2	11823464400	31.1144	78823096	43	150
TG10	D1908388A-LJ_L2_111111.R1	11841783750	31.1626	78945225	43	150
TG10	D1908388A-LJ_L2_111111.R2	11841783750	31.1626	78945225	43	150
TG21	D1908399A-ZXX_L4_312312.R1	11867608200	31.2305	79117388	43	150
TG21	D1908399A-ZXX_L4_312312.R2	11867608200	31.2305	79117388	43	150
TG7	D1908385A-XH_L2_114114.R1	12143550150	31.9567	80957001	43	150
TG7	D1908385A-XH_L2_114114.R2	12143550150	31.9567	80957001	43	150
TG31	D1908409A-ZXX_L4_194194.R1	12184363800	32.0641	81229092	42	150
TG31	D1908409A-ZXX_L4_194194.R2	12184363800	32.0641	81229092	43	150
TG34	D1908412A-WH_L4_191191.R1	12446884800	32.755	82979232	42	150
TG34	D1908412A-WH_L4_191191.R2	12446884800	32.755	82979232	43	150
TG2	D1908380A-ZXX_L4_301301.R1	12524711850	32.9598	83498079	43	150
TG2	D1908380A-ZXX_L4_301301.R2	12524711850	32.9598	83498079	43	150
TG46	D1908416A-QJ_L4_187187.R1	12567970950	33.0736	83786473	42	150
TG46	D1908416A-QJ_L4_187187.R2	12567970950	33.0736	83786473	42	150
TG32	D1908410A-ZJ_L4_193193.R1	12761107800	33.5819	85074052	42	150
TG32	D1908410A-ZJ_L4_193193.R2	12761107800	33.5819	85074052	43	150
TG11	D1908389A-LJ_L2_110110.R1	12773493750	33.6145	85156625	42	150
TG11	D1908389A-LJ_L2_110110.R2	12773493750	33.6145	85156625	42	150
TG42	D1908413A-WH_L4_190190.R1	12824033100	33.7475	85493554	42	150
TG42	D1908413A-WH_L4_190190.R2	12824033100	33.7475	85493554	42	150
TG33	D1908411A-ZJ_L4_192192.R1	13125158700	34.5399	87501058	42	150
TG33	D1908411A-ZJ_L4_192192.R2	13125158700	34.5399	87501058	42	150
TG75	D1908443A-LJ_L2_156156.R1	13171479600	34.6618	87809864	42	150
TG75	D1908443A-LJ_L2_156156.R2	13171479600	34.6618	87809864	42	150
TG68	D1908436A-LJ_L4_158158.R1	13213046400	34.7712	88086976	42	150
TG68	D1908436A-LJ_L4_158158.R2	13213046400	34.7712	88086976	42	150
TG85	D1908452A-QJ_L2_142142.R1	13482315000	35.4798	89882100	43	150
TG85	D1908452A-QJ_L2_142142.R2	13482315000	35.4798	89882100	43	150
TG88	D1908455A-ZJ_L2_139139.R1	13491716400	35.5045	89944776	43	150
TG88	D1908455A-ZJ_L2_139139.R2	13491716400	35.5045	89944776	43	150
TG22	D1908400A-ZXX_L3_311311.R1	13536040200	35.6212	90240268	43	150
TG22	D1908400A-ZXX_L3_311311.R2	13536040200	35.6212	90240268	43	150
TG64	D1908432A-WH_L4_159159.R1	13584227250	35.748	90561515	43	150
TG64	D1908432A-WH_L4_159159.R2	13584227250	35.748	90561515	43	150
TG52	D1908421A-LJ_L4_181181.R1	13622955000	35.8499	90819700	42	150
TG52	D1908421A-LJ_L4_181181.R2	13622955000	35.8499	90819700	43	150
TG61	D1908429A-ZJ_L4_162162.R1	13989933150	36.8156	93266221	43	150
TG61	D1908429A-ZJ_L4_162162.R2	13989933150	36.8156	93266221	43	150
TG62	D1908430A-ZJ_L4_161161.R1	14129094450	37.1818	94193963	42	150
TG62	D1908430A-ZJ_L4_161161.R2	14129094450	37.1818	94193963	42	150
TG77	D1908445A-LJ_L4_154154.R1	14378829000	37.839	95858860	43	150
TG77	D1908445A-LJ_L4_154154.R2	14378829000	37.839	95858860	43	150
TG70	D1908438A-ZXX_L4_157157.R1	14637973800	38.521	97586492	43	150
TG70	D1908438A-ZXX_L4_157157.R2	14637973800	38.521	97586492	43	150
TG30	D1908408A-ZXX_L4_195195.R1	14701709400	38.6887	98011396	42	150
TG30	D1908408A-ZXX_L4_195195.R2	14701709400	38.6887	98011396	42	150
TG45	D1908415A-ZXX_L4_188188.R1	14704980450	38.6973	98033203	43	150
TG45	D1908415A-ZXX_L4_188188.R2	14704980450	38.6973	98033203	43	150
TG24	D1908402A-ZXX_L3_308308.R1	14726906100	38.755	98179374	43	150
TG24	D1908402A-ZXX_L3_308308.R2	14726906100	38.755	98179374	43	150
TG43	D1908414A-XZ_L4_189189.R1	14829298950	39.0245	98861993	42	150
TG43	D1908414A-XZ_L4_189189.R2	14829298950	39.0245	98861993	42	150
WSSM	D1910259A-QJ_L3_307307.R1	14847780150	39.0731	98985201	43	150
WSSM	D1910259A-QJ_L3_307307.R2	14847780150	39.0731	98985201	43	150
TG53	D1908422A-XH_L4_179179.R1	15068825850	39.6548	100458839	42	150
TG53	D1908422A-XH_L4_179179.R2	15068825850	39.6548	100458839	42	150
TG49	D1908418A-QJ_L4_185185.R1	15340783950	40.3705	102271893	42	150
TG49	D1908418A-QJ_L4_185185.R2	15340783950	40.3705	102271893	42	150
TG56	D1908425A-ZXX_L4_167167.R1	15662287950	41.2165	104415253	43	150
TG56	D1908425A-ZXX_L4_167167.R2	15662287950	41.2165	104415253	43	150
TG27	D1908405A-ZXX_L1_102102.R1	15876086700	41.7792	105840578	42	150
TG27	D1908405A-ZXX_L1_102102.R2	15876086700	41.7792	105840578	43	150
TG51	D1908420A-LJ_L4_183183.R1	16053176400	42.2452	107021176	43	150
TG51	D1908420A-LJ_L4_183183.R2	16053176400	42.2452	107021176	43	150
TG54	D1908423A-XH_L4_178178.R1	16583757000	43.6415	110558380	42	150
TG54	D1908423A-XH_L4_178178.R2	16583757000	43.6415	110558380	43	150
TG29	D1908407A-GQ_L1_196196.R1	17002315650	44.7429	113348771	42	150
TG29	D1908407A-GQ_L1_196196.R2	17002315650	44.7429	113348771	42	150
TG28	D1908406A-GQ_L1_101101.R1	19599674700	51.5781	130664498	42	150
TG28	D1908406A-GQ_L1_101101.R2	19599674700	51.5781	130664498	43	150
TG65	R19046522-LPM180238-2-CD1908433A-WH_combined.R1	58820189400	154.79	392134596	43	150
TG65	R19046522-LPM180238-2-CD1908433A-WH_combined.R2	58820189400	154.79	392134596	43	150
