# Supplementary material for: Long-read sequencing of 111 rice genomes reveals significantly larger pan-genomes
Source: HighWire-hosted journal article supplement (doi:10.1101/gr.276015.121), 2022-04-08
Supplement: Supplemental_Table_S4.xlsx [file Supplemental_Table_S4.xlsx]

## Sheet: Sheet1
Supplemental Table S4. Summary of assembly metrics from 69+13 cultivated and 6 wild rice accessions.
SampleID	PredictedAssemblySize	AssemblySize(b)	ContigN50	ScaffoldNumber	ScaffoldN50	GCcontent(%)	BUSCO(%)	TEpercentage(%)	ChromosomeSize(b)	GapNumberInScaffolds
QUAN	347369448	394400455	26629212	97	32563223	43.59	98.1	45.82	385001017	191
TG1	351276120	395432161	28397196	114	36075779	43.61	97.5	46.16	389078699	259
TG10	348694137	396254309	23512328	95	32859750	43.63	98.3	46.38	392071363	246
TG11	408174764	514801554	1826916	565	35210059	43.52	98.5	48.45	436360248	720
TG12	542077777	797869369	593090	1505	43559759	43.54	97.7	48.82	571489556	1509
TG13	348272747	398508977	26682891	56	33730975	43.63	98.5	48.48	395300414	209
TG14	341886154	379088728	22998537	59	30663618	43.5	98.2	44.46	377046120	149
TG15	341576491	383019686	20953746	63	32275811	43.53	98.3	44.98	379451793	184
TG16	369634334	471983729	4158310	399	35001606	43.57	98.4	47.99	417408291	545
TG17	341018238	384059475	20272633	92	30306559	43.57	98.1	44.88	380934220	189
TG18	335645097	376127504	20819164	47	30366159	43.5	97.9	44.25	375089961	139
TG19	347059473	397087769	12583180	219	30371103	43.52	98.5	44.88	382457816	204
TG2	340665465	377532188	16791831	93	35383889	43.5	98.2	44.05	374173268	137
TG21	349888747	395535492	26001585	74	31970734	43.6	98.5	46.36	391081274	211
TG22	341616014	377117019	27173032	68	29966810	43.52	98.3	44.11	375388325	111
TG24	350111089	395621149	30319899	78	30905011	43.61	97.9	46.21	391361773	190
TG27	346652456	383318168	25045798	65	30944886	43.45	98.1	45.12	379298497	193
TG28	350041845	396072871	23748412	76	31563387	43.61	98.3	46.06	389972582	199
TG29	338202143	377505834	17510145	68	29985767	43.48	98.1	44.05	374520514	137
TG3	340793441	382079124	20718908	89	30508673	43.57	98.2	44.57	378257441	175
TG30	346638226	396817318	23802938	69	31332587	43.62	98.3	46.06	392909167	233
TG31	341267124	383298783	29362301	55	30357401	43.55	98.5	45.01	380444382	138
TG32	339547491	381078414	24654414	82	30540385	43.52	98.4	44.6	347981616	182
TG33	347670062	398163435	28504670	48	33901234	43.63	98.4	46.49	394594425	162
TG34	335854197	380997240	23418084	46	30320164	43.53	98.3	44.84	379269167	121
TG4	340478885	381356505	22451194	76	36054142	43.49	97.8	44.75	378011164	153
TG42	347865408	397076940	30518009	60	32410860	43.63	98.4	46.17	393152488	175
TG43	349003481	397619672	21315330	57	31103319	43.63	98.3	46.47	380038760	229
TG45	350447436	399499122	23500299	82	30440971	43.64	98.6	46.33	374970188	235
TG46	337092671	380439825	26729271	57	31337524	43.54	98.5	44.4	377605819	120
TG49	344311507	386169982	24799338	93	30964768	43.5	98.6	45.37	381788842	222
TG5	348169338	399951279	20955998	83	30953483	43.61	98.2	46.52	393410599	201
TG50	338664963	400386333	18029959	139	31133982	43.61	98.4	46.24	390536882	283
TG51	352354889	396453872	30016307	52	31515899	43.62	98.3	46.48	393805137	168
TG52	348192613	392651542	26846099	72	32597057	43.55	98.2	46.01	389542141	224
TG53	346881995	392109546	25582894	54	31758487	43.58	98.5	45.65	389069070	182
TG54	539412388	694983055	904356	1128	41509376	43.56	98.2	49.31	517255382	1041
TG55	344443294	394442534	26742395	59	32328108	43.59	98.5	46.22	390398164	175
TG56	351328350	400237220	31180455	40	33092161	43.69	98.4	46.76	397655089	153
TG58	347868797	396943800	25342116	71	35207320	43.61	98	46.15	384998658	216
TG59	345533952	395017102	26449810	80	32200210	43.59	98.3	45.94	390616150	205
TG6	341353468	388582842	30106521	40	30874652	43.53	98.2	45.35	386336662	172
TG60	342984766	384319609	30614910	56	32298025	43.46	98.4	45.21	382359611	180
TG61	353321354	399105241	30254780	46	33378845	43.66	98.5	46.64	396402954	152
TG62	345659703	392935867	24475901	61	32312466	43.55	98.5	45.9	388753279	226
TG63	336783892	380433718	20456300	60	30612040	43.54	98.3	44.68	378216832	169
TG64	351015946	394498882	26862637	52	32215704	43.59	98.2	46.28	391749135	197
TG65	353324594	383016118	22992018	68	31043761	43.52	98.5	44.8	380312412	171
TG68	346648028	394792536	26931660	49	31711436	43.62	98.4	46.25	391490246	157
TG7	349412882	399527080	31207825	69	37030492	43.65	98.4	46.58	396119140	173
TG70	352001010	397485897	25818030	58	32751650	43.63	98.3	46.44	393349563	198
TG75	346739093	395931629	31466125	49	32836163	43.61	98.1	46.39	393514410	149
TG76	343518131	391935861	31358719	39	32902954	43.54	98.3	45.78	389554880	147
TG77	350047555	398417899	30494893	44	33344471	43.64	98.3	46.39	396065420	168
TG78	363972400	411579173	19706058	139	33267318	43.55	97.6	46.26	398518375	266
TG8	349233112	394835322	27600659	49	32272682	43.59	98.6	46.12	391266230	130
TG80	346476781	393834516	27041615	48	32228458	43.59	98.1	46.09	389761043	197
TG81	340266420	381077974	24246651	89	30496732	43.53	98.2	44.56	376569756	191
TG82	347235899	391166142	29472912	49	36020638	43.57	98.3	45.44	388210247	194
TG83	349620964	394695390	28557252	72	37099758	43.6	98.5	46.21	390032886	208
TG84	348497824	393192242	26107597	63	31539387	43.58	98.2	45.85	390049874	182
TG85	351882698	394543747	25531843	72	31542369	43.6	98.2	45.94	389779271	202
TG86	350117610	393738832	23694692	55	32002143	43.58	97.7	45.95	390024767	207
TG87	347103768	384713972	25857203	56	35183321	43.48	98.4	45.23	381144003	155
TG88	351628724	391722880	23343165	66	32223709	43.62	98.3	45.89	387573453	226
TG9	343788343	394071163	31071073	55	32080382	43.58	98.8	45.84	389193884	169
TG90	342487295	380595034	20924676	65	30925112	43.52	98.2	44.62	376777692	156
wild111	472089429	561366301	1000431	851	37056838	43.86	97.6	48.82	465691826	1082
wild12	499291619	632548137	1005708	1035	39320746	43.94	98.3	49.56	496342691	1089
wild131	470854729	564699293	1334320	750	36862030	43.84	97.8	48.76	459967509	876
wild219	391488916	531798594	4001362	439	37699574	44.16	98.2	49.17	461750902	630
wild273	429339284	566779526	1410462	733	38218017	44.2	98.1	49.93	467632917	823
wild65	498067625	623732716	1056626	950	38409084	43.92	98.1	48.43	484132668	1059
WSSM	351793538	402612284	27338677	57	37484077	43.84	98.2	45.42	394631847	203
WW8	343178127	382042065	24864758	58	30539015	43.56	98.2	44.96	380160368	190
H7L1	-	384794742	-	560	29887911	43.56	97.7	45.58	370981447	259
H7L26	-	372190510	-	578	28911376	43.44	96.3	44.72	358730719	1535
H7L27	-	384260384	-	447	30449524	43.56	97.8	45.54	370305003	780
H7L28	-	374815364	-	646	29154922	43.47	96.4	44.76	359889243	1439
H7L29	-	379613395	-	446	29831089	43.51	97.6	45.24	368728839	942
H7L30	-	382609554	-	665	29353797	43.53	97.6	45.42	367042979	1148
H7L31	-	379384989	-	694	29644360	43.48	97	45.07	364974792	1338
H7L32	-	385124685	-	658	29938089	43.56	97.6	45.51	368452917	996
H7L33	-	385427110	-	413	30142670	43.55	97.3	45.78	372137448	881
SE-3	-	384883203	-	116	30712224	43.41	98.4	45.5	378635584	402
SE-19	-	385627330	-	122	30724056	43.36	98.6	45.34	379321300	362
SE-33	-	384344327	-	138	31053478	43.4	98.4	45.33	376987852	396
SE-134	-	383056684	-	104	30510485	43.34	98.4	45.15	376487161	343
* SampleID: the sample IDs of rice accessions.
* BUSCO: the ratio of the number of completely covered BUSCO genes/the total number of BUSCO genes.
* TEpercentage: percentage of transposable elements (SINEs, LINEs, LTR elements, DNA transposons, Unclassified) in the assembly.
* Chromosome Size: the size of assembly that can be located in the corresponding chromosome.
