# Supplementary material for: Long-read sequencing of 111 rice genomes reveals significantly larger pan-genomes
Source: HighWire-hosted journal article supplement (doi:10.1101/gr.276015.121), 2022-04-08
Supplement: Supplemental_Table_S5.xlsx [file Supplemental_Table_S5.xlsx]

## Sheet: Sheet1
Supplemental Table S5. Summary of sequencing data of 25 rice accessions from public databases.
No	Project	Name	Assembly	Sequence ID (SRA)	Sequencing depth	Data type	Published Paper
1	PRJNA565484	CHAO MEO::IRGC 80273-1	GCA_009831315.1	SRR10302322~SRR10302323;	123	Illumina;	Yong Zhou. Scientific data, 2020
				SRR10302224~SRR10302237		PacBio Sequel
2	PRJNA424001	Azucena	GCA_009830595.1	SRR10357910;	143	Illumina;	Yong Zhou. Scientific data, 2020
				SRR10356259~ SRR10356274		PacBio Sequel
3	PRJNA564615	KETAN NANGKA::IRGC 19961-2	GCA_009831275.1	SRR10302293~SRR10302294;	125	Illumina;	Yong Zhou. Scientific data, 2020
				SRR10302149~SRR10302153		PacBio Sequel
4	PRJNA565479	ARC 10497::IRGC 12485-1	GCA_009831255.1	SRR10302329~SRR10302330;	112	Illumina;	Yong Zhou. Scientific data, 2020
				SRR10302163~SRR10302169		PacBio Sequel
5	PRJNA509165	IR 64	GCA_009914875.1	SRR10357929;	149	Illumina;	Yong Zhou. Scientific data, 2020
				SRR10357911~ SRR10357919		PacBio Sequel
6	PRJNA563359	PR 106::IRGC 53418-1	GCA_009831045.1	SRR10302284~SRR10302285;	105	Illumina;	Yong Zhou. Scientific data, 2020
				SRR10302137~SRR10302141		PacBio Sequel
7	PRJNA564572	LIMA::IRGC 81487-1	GCA_009829395.1	SRR10302289~SRR10302290;	103	Illumina;	Yong Zhou. Scientific data, 2020
				SRR10302142~SRR10302146		PacBio Sequel
8	PRJNA565481	KHAO YAI GUANG::IRGC 65972-1	GCA_009831295.1	SRR10302297~SRR10302298;	106	Illumina;	Yong Zhou. Scientific data, 2020
				SRR10302214~SRR10302218		PacBio Sequel
9	PRJNA564763	GOBOL SAIL (BALAM)::IRGC 26624-2	GCA_009831025.1	SRR10302331~SRR10302332;	105	Illumina;	Yong Zhou. Scientific data, 2020
				SRR10302259~SRR10302264		PacBio Sequel
10	PRJNA577228	LIU XU::IRGC 109232-1	GCA_009829375.1	SRR10302300, SRR10302299;	138	Illumina;	Yong Zhou. Scientific data, 2020
				SRR10302205~SRR10302212		PacBio Sequel
11	PRJNA565480	LARHA MUGAD::IRGC 52339-1	GCA_009831355.1	SRR10302291~SRR10302292;	113	Illumina;	Yong Zhou. Scientific data, 2020
				SRR10302200~SRR10302204		PacBio Sequel
12	PRJNA565483	NATEL BORO::IRGC 34749-1	GCA_009831335.1	SRR10302301~SRR10302302;	111	Illumina;	Yong Zhou. Scientific data, 2020
				SRR10302219~SRR10302223		PacBio Sequel
13	PRJNA564911	R600	GCA_009829725.1	SRR10121533;	122	Illumina;	-
				SRR10121034		PacBio Sequel
14	PRJNA482013	Tetep	GCA_004348155.2	SRR8241155;	148	Illumina;	-
				SRR8184521		PacBio Sequel
15	PRJNA396093	Suijing18	GCA_002573525.1	SRR5880533;	62	Illumina;	Shou-Jun Nie, Scientific data, 2017
				SRR5877285		PacBio Sequel
16	PRJDB8810	IR64	GCA_011764405.2	DRR196879;	390	Illumina;	-
				DRR196880		MinION
17	PRJEB32431	Sadri	https://zenodo.org/record/3355330#.X5KEU1MzbOQ	SRR9852329;	51.4	Illumina;	Choi. Genome Biology, 2020
				ERX3498024~ERX3498027		GridION
18	PRJEB28274	Basmati	https://zenodo.org/record/3355330#.X5KEU1MzbOQ	SRR9852412;	62.5	Illumina;	Choi. Genome Biology, 2020
				ERS3649402~ERS3649406		GridION
19	PRJNA227300	HR-12	GCA_000725085.2	SRR3056468;	93	Illumina;	H B Mahesh. BMC Genomics, 2016
				SRR3075258		PacBio RS II
20	PRJNA315689	Nagina 22	GCA_001952365.3	SRR3272418~ SRR3272461(no SRR3272448 SRR3272449)	65	PacBio RS II	-
21	PRJNA318714	Shuhui498/R498	GCA_002151415.1	SRR3422892(new);SRR5011847(old);	120	Illumina;	Huilong Du . Nature communications, 2017
				SRR3404720~SRR3404744(no SRR3404723 SRR3404734), SRR3404610~SRR3404650(no SRR3404620 SRR3404631 SRR3404642)		PacBio RS II
22	PRJNA503892	Carolina Gold Select	GCA_004007595.1	SRR9326866;	100	Illumina;	-
				SRR9321972		MinION
23	PRJNA302542	Zhenshan 97	GCA_001623345.2	SRR5456666~SRR5456701;	120	PacBio RS II	Jiaming Song. Molecular Plant, 2021
24	PRJNA353946	IR8	GCA_001889745.1	SRR5045675~SRR5045716;	70	PacBio RS II	-
25	PRJNA448171; PRJNA234782	Kitaake(Ubi-Xa21)	GCA_009797565.1	SRR7789808~SRR7789810; SRR8499398, SRR8499413~ SRR8499416, SRR8509971;	532	Illumina;	Rashmi Jain. BMC Genomics, 2019
				SRR8499372~SRR8499418(no SRR8499398, SRR8499413~ SRR8499416)		PacBio RS II
