# Supplementary material for: Long-read sequencing of 111 rice genomes reveals significantly larger pan-genomes
Source: HighWire-hosted journal article supplement (doi:10.1101/gr.276015.121), 2022-04-08
Supplement: Supplemental_Table_S6.xlsx [file Supplemental_Table_S6.xlsx]

## Sheet: Sheet1
Supplemental Table S6. Summary of gap-filled high-quality reference genomes of rice accessions.
Accession	Group	RawChromosomeSize	Gaps	FilledGaps(CorrectReads)	FilledGaps(Contigs)	FilledGaps(Total)	FilledGapsRate	UsedSamples	FilledChromosomeSize	RawCompleteSingle-CopyBUSCOs	RawCompleteDuplicatedBUSCOs	RawFragmentedBUSCOs	RawMissingBUSCOs	RawBUSCOs	FilledCompleteSingle-CopyBUSCOs	FilledCompleteDuplicatedBUSCOs	FilledFragmentedBUSCOs	FilledMissingBUSCOs	FilledBUSCOs
Nipponbare	GJ	373245519	73	2	43	43	0.589041	TG15 TG31 TG32 TG14 TG65 TG63 TG4 TG17 TG3 TG18 TG2 TG90 TG46 TG29 TG19	394584824	1560	31	14	9	0.98575	1542	49	14	9	0.98575
NATELBORO	cA	383720936	4	0	4	4	1	TG60 TG6 TG27 TG49 TG87 TG62	386309038	1551	31	20	12	0.980173	1547	35	20	12	0.980173
ARC10497	cB	378463869	28	1	24	24	0.857143	WW8 TG81 TG12 TG54	387007516	1554	35	15	10	0.984511	1543	46	15	10	0.984511
PR106	XI-1B	391176105	4	0	4	4	1	TG30 TG42 TG50 TG51 TG76 TG77 TG78 TG82 TG83 TG86 TG88	391496070	1555	35	14	10	0.98513	1555	35	14	10	0.98513
LARHAMUGAD	XI-2	390195943	4	0	4	4	1	TG8 TG9 TG28 TG53 TG55 TG58 TG59	390615071	1558	32	15	9	0.98513	1557	33	15	9	0.98513
LIMA	XI-3	392625308	5	0	5	5	1	TG1 TG5 TG7 TG13 TG33 TG43 TG56 TG61	392993816	1547	37	20	10	0.981413	1547	37	20	10	0.981413
CHAOMEO	GJ-sbtrp	376856903	43	0	40	40	0.930233	TG3 TG4 TG17 TG18 TG63	378995595	1556	36	14	8	0.986369	1555	37	14	8	0.986369
Qiutianxiaoting	GJ-tmp	375388325	111	1	56	57	0.513514	TG2 TG22 TG19 TG29 TG46 TG90	388122882	1555	31	18	10	0.982652	1548	39	17	10	0.983271
KETANNANGKA	GJ-trp	380759091	9	0	9	9	1	TG14 TG15 TG31 TG32 TG65	388618554	1556	34	15	9	0.98513	1553	37	15	9	0.98513
* Gaps of Nipponbare are those with more than 1000 Ns (the same as those reported in http://rice.plantbiology.msu.edu/annotation_pseudo_current.shtml), and gaps of other accessions are those with more than 100 Ns
* Qiutianxiaoting pseudo-chromosome genome was constructed with guide of Nipponbare reference genome
* BUSCO v5.1.2, embryophyta_odb10 creation date: 2020-09-10
