# Supplementary material for: Long-read sequencing of 111 rice genomes reveals significantly larger pan-genomes
Source: HighWire-hosted journal article supplement (doi:10.1101/gr.276015.121), 2022-04-08
Supplement: Supplemental_Table_S7.xlsx [file Supplemental_Table_S7.xlsx]

## Sheet: Sheet1
Supplemental Table S7. Mapping rates of novel genes to the reference genome and three different pan-genomes (identity >= 95%, transcript coverage >= 95%, all high-scoring segment pairs' lengths are more than 28bps).
Source of novel genes (gene number)	Map to Nipponbare reference genome	Map to 3K-RG pan-genome	Map to 63-TGSRG pan-genome	Map to 111-TGSRG pan-genome
3K-RG (12466)	44.2% (5507)	-	78.3% (9760)	87.0% (10844)
63-TGSRG (9247)	38.0% (3517)	58.4% (5397)	-	96.6% (8930)
111-TGSRG (19319)	41.1% (7945)	55.7% (10754)	69.4% (13402)	-
66-RG (22250)	38.9% (8648)	58.7% (13067)	69.2% (15391)	80.9% (17997)
* 3K-RG: 3010 cultivated rice accessions with NGS.
* 63-TGSRG: 63 cultivated rice accessions from 3K-RG with TGS.
* 111-TGSRG: 105 cultivated rice accessions and 6 wild rice accessions with TGS.
* 66-RG: 53 cultivated rice accessions and 13 wild rice accessions with NGS.
* Query: genes. Target: Pan-genomes.
