# Supplementary material for: Long-read sequencing of 111 rice genomes reveals significantly larger pan-genomes
Source: HighWire-hosted journal article supplement (doi:10.1101/gr.276015.121), 2022-04-08
Supplement: Supplemental_Table_S8.xlsx [file Supplemental_Table_S8.xlsx]

## Sheet: Sheet1
Supplemental Table S8. Mapping rates of novel gene transcripts to transcripts from different genomes or pan-genomes (global identity >= 95%)
Source of novel genes (gene number)	Map to MSU7 transcripts (55986)	Map to IRGSP1 transcripts (35633)	Map to 3K-RG transcripts (35633 + 12466)	Map to 63-TGSRG transcripts (55986 + 9247)	Map to 111-TGSRG transcripts (55986 + 19319)	Map to 66-RG transcripts (55986 + 22250)
3K-RG (12466)	11.6% (1445)	2.4% (305)	-	16.8% (2098)	18.0% (2248)	21.0% (2612)
63-TGSRG (9247)	8.4 %(776)	7.2% (668)	13.4% (1238)	-	82.6% (7636)	17.1% (1583)
111-TGSRG (19319)	6.4% (1240)	5.6% (1087)	9.5% (1840)	42.9% (8284)	-	12.2% (2360)
66-RG (22250)	0.1% (29)	0.03% (7)	3.5% (786)	2.8% (616)	3.4% (746)	-
* 3K-RG novel genes are based on IRGSP1. Other novel genes are based on MSU7.
* Query: transcript sequences. Target: transcript sequences.
