# Supplementary material for: Long-read sequencing of 111 rice genomes reveals significantly larger pan-genomes
Source: HighWire-hosted journal article supplement (doi:10.1101/gr.276015.121), 2022-04-08
Supplement: Supplemental_Table_S9.xlsx [file Supplemental_Table_S9.xlsx]

## Sheet: Sheet1
Supplemental Table S9. Mapping rate of novel gene proteins to different proteins of genomes or pan-genomes (global identity >= 95%)
Source of novel genes (protein number)	Map to MSU7 proteins (55,986)	Map to IRGSP1 proteins (35,633)	Map to 3K-RG proteins (35,633 + 12,466)	Map to 63-TGSRG proteins (55,986 + 9,247)	Map to 111-TGSRG proteins (55,986 + 19,319)	Map to 66-RG proteins (55,986 + 22,250)
3K-RG (12,466)	6.8% (852)	0% (1)	-	11.6% (1,440)	12.5% (1,556)	14.1% (1,758)
63-TGSRG (9,247)	4.1% (375)	4.2% (390)	9.6% (892)	-	80.3% (7,424)	11.3% (1,042)
111-TGSRG (19,319)	0.15% (29)	0.98% (187)	4.0% (765)	35.2% (6,799)	-	4.2% (819)
66-RG (22,250)	0% (1)	0% (2)	2.6% (573)	1.7% (380)	2.1% (472)	-
* Query: Proteins. Target: Proteins.
* 3K-RG (1): Un_maker_86401->Os12g0114300, Os12g0114300->Os12g0114000
