# Supplementary material for: Long-read sequencing of 111 rice genomes reveals significantly larger pan-genomes
Source: HighWire-hosted journal article supplement (doi:10.1101/gr.276015.121), 2022-04-08
Supplement: Supplemental_Table_S10.xlsx [file Supplemental_Table_S10.xlsx]

## Sheet: Sheet1
Supplemental Table S10. Mapping rate of novel gene proteins to different proteins of genomes or pan-genomes (global identity >= 50%)
Source of novel genes (protein number)	Map to MSU7 proteins (55986)	Map to IRGSP1 proteins (35633)	Map to 3K-RG proteins (35633 + 12466)	Map to 63-TGSRG proteins (55986 + 9247)	Map to 111-TGSRG proteins (55986 + 19319)	Map to 66-RG proteins (55986 + 22250)
3K-RG (12466)	41.8% (5211)	21.8% (2722)	-	46.1% (5742)	47.2% (5886)	53.7% (6694)
63-TGSRG (9247)	57.5% (5315)	45.5% (4212)	54.3% (5019)	-	95.4% (8819)	72.4% (6697)
111-TGSRG (19319)	55.1% (10643)	44.6% (8622)	51.2% (9892)	78.0% (15089)	-	66.9% (12918)
66-RG (22250)	13.3% (2968)	6.9% (1536)	15.1% (3364)	19.8% (4403)	21.3% (4749)	-
* Query: Proteins. Target: Proteins.
