# Supplementary material for: Long-read sequencing of 111 rice genomes reveals significantly larger pan-genomes
Source: HighWire-hosted journal article supplement (doi:10.1101/gr.276015.121), 2022-04-08
Supplement: Supplemental_Table_S11.xlsx [file Supplemental_Table_S11.xlsx]

## Sheet: Sheet1
Supplemental Table S11. Assocation of phenotypes and genes (only results with P<5e-2 and FDR<5e-2 are listed)
Phenotype	Gene	P	FDR
meanPL	LOC_Os12g27960	7.66873e-07	0.0250844
grain_length_width_ratio	LOC_Os01g27930	1.00486e-06	0.00818678
grain_length_width_ratio	LOC_Os09g01375	1.2151e-06	0.00818678
meanPH	elg79355_pred_17924	1.65998e-06	0.0173249
meanPBN	LOC_Os10g11454	1.74435e-06	0.0232966
meanPH	elg121811_pred_46004	1.81571e-06	0.0173249
meanPBN	LOC_Os04g17820	1.91033e-06	0.0232966
SCCO_REV	LOC_Os07g11430	1.9654e-06	0.0214091
SCCO_REV	LOC_Os07g11440	1.9654e-06	0.0214091
SCCO_REV	LOC_Os07g11450	1.9654e-06	0.0214091
grain_width	LOC_Os01g27930	2.23554e-06	0.0137603
meanPBN	LOC_Os10g02200	2.24867e-06	0.0232966
meanPH	LOC_Os06g17970	2.47628e-06	0.0173249
meanPH	elg21383_pred_80536	2.64507e-06	0.0173249
meanPH	LOC_Os03g60670	2.64826e-06	0.0173249
meanGW	LOC_Os11g07630	2.69433e-06	0.0318582
meanGW	LOC_Os04g18380	2.76973e-06	0.0318582
meanPBN	LOC_Os03g27170	2.84886e-06	0.0232966
SCCO_REV	elg67589_pred_10720	2.86387e-06	0.0233971
grain_length_width_ratio	LOC_Os07g12304	3.1493e-06	0.00818678
grain_length_width_ratio	LOC_Os05g25130	3.42433e-06	0.00818678
grain_length_width_ratio	LOC_Os12g31890	3.57473e-06	0.00818678
grain_length_width_ratio	elg20584_pred_80038	3.64042e-06	0.00818678
meanPBN	LOC_Os07g33915	3.75064e-06	0.0245367
meanGW	LOC_Os11g43090	4.1913e-06	0.0318582
grain_length_width_ratio	LOC_Os07g12310	4.21698e-06	0.00818678
meanPBN	LOC_Os05g46810	4.86765e-06	0.0265368
meanGW	LOC_Os04g18330	4.95247e-06	0.0318582
grain_length_width_ratio	LOC_Os03g33300	5.81132e-06	0.00818678
grain_length_width_ratio	LOC_Os12g31880	5.81132e-06	0.00818678
meanPH	elg64920_pred_8965	5.90825e-06	0.0247574
grain_width	LOC_Os12g31890	6.02793e-06	0.0137603
grain_length_width_ratio	LOC_Os01g31040	6.05211e-06	0.00818678
grain_length_width_ratio	LOC_Os12g32536	6.08113e-06	0.00818678
grain_length_width_ratio	elg42512_pred_91495	6.08113e-06	0.00818678
grain_length_width_ratio	LOC_Os07g14380	6.17314e-06	0.00818678
grain_width	LOC_Os04g21530	6.35872e-06	0.0137603
meanPH	elg84382_pred_20932	6.36552e-06	0.0247574
meanPBN	LOC_Os04g17280	6.47127e-06	0.0301041
meanPH	elg79355_pred_17923	6.5376e-06	0.0247574
grain_length_width_ratio	LOC_Os04g21530	6.55646e-06	0.00818678
grain_length_width_ratio	LOC_Os12g32450	6.6077e-06	0.00818678
grain_width	LOC_Os09g01375	6.6167e-06	0.0137603
meanPH	elg71252_pred_13056	6.81188e-06	0.0247574
grain_length_width_ratio	LOC_Os04g21520	6.97545e-06	0.00818678
culm_number	elg13797_pred_60137	6.97579e-06	0.023766
grain_width	LOC_Os04g33590	7.02139e-06	0.0137603
meanGW	LOC_Os03g59810	7.25084e-06	0.0318582
meanGW	LOC_Os07g32650	7.2846e-06	0.0318582
grain_length_width_ratio	LOC_Os09g16740	7.40369e-06	0.00818678
grain_length_width_ratio	LOC_Os09g01400	7.40369e-06	0.00818678
grain_length_width_ratio	LOC_Os04g22210	7.4573e-06	0.00818678
grain_length_width_ratio	LOC_Os03g43340	7.49626e-06	0.00818678
meanGW	LOC_Os03g59820	7.74236e-06	0.0318582
meanGW	LOC_Os02g28220	8.14163e-06	0.0318582
grain_width	LOC_Os05g25130	8.18694e-06	0.0137603
culm_number	LOC_Os06g42940	8.60179e-06	0.023766
meanPBN	LOC_Os04g18410	8.61943e-06	0.0301041
meanPBN	LOC_Os04g13740	8.61943e-06	0.0301041
meanGW	LOC_Os02g28240	8.76564e-06	0.0318582
grain_width	LOC_Os07g17050	9.09731e-06	0.0137603
meanPBN	LOC_Os04g18730	9.26208e-06	0.0301041
grain_width	LOC_Os12g42720	9.37286e-06	0.0137603
grain_width	LOC_Os07g17010	9.37286e-06	0.0137603
meanPH	LOC_Os06g17950	9.52753e-06	0.0270372
grain_length_width_ratio	LOC_Os02g12090	9.56581e-06	0.00818678
grain_width	LOC_Os03g39270	9.6406e-06	0.0137603
grain_width	elg151067_pred_70373	9.75395e-06	0.0137603
grain_width	LOC_Os01g28580	9.75395e-06	0.0137603
culm_number	elg78664_pred_17563	9.78748e-06	0.023766
grain_length_width_ratio	elg130869_pred_53174	1.00626e-05	0.00818678
grain_length_width_ratio	LOC_Os01g34490	1.00626e-05	0.00818678
grain_width	LOC_Os12g31880	1.02381e-05	0.0137603
meanGW	LOC_Os12g42720	1.02465e-05	0.0335162
meanPH	LOC_Os05g04240	1.05912e-05	0.0270372
meanPH	LOC_Os05g04250	1.05912e-05	0.0270372
meanPH	LOC_Os01g36280	1.07454e-05	0.0270372
grain_width	elg22687_pred_81208	1.08526e-05	0.0137603
grain_length_width_ratio	LOC_Os03g56770	1.11866e-05	0.00818678
grain_width	LOC_Os07g27670	1.12223e-05	0.0137603
grain_length_width_ratio	LOC_Os03g26660	1.13308e-05	0.00818678
grain_length_width_ratio	LOC_Os08g03460	1.138e-05	0.00818678
LPPUB	LOC_Os01g40830	1.17709e-05	0.0412406
LPPUB	LOC_Os08g29124	1.17709e-05	0.0412406
meanPBN	LOC_Os10g16490	1.1817e-05	0.0301041
grain_length_width_ratio	LOC_Os01g32100	1.1873e-05	0.00818678
grain_length_width_ratio	LOC_Os07g29460	1.1873e-05	0.00818678
grain_length_width_ratio	LOC_Os03g24980	1.1873e-05	0.00818678
grain_length_width_ratio	LOC_Os02g48250	1.1873e-05	0.00818678
culm_number	elg91712_pred_25270	1.18819e-05	0.023766
grain_length_width_ratio	LOC_Os05g03960	1.19511e-05	0.00818678
grain_length_width_ratio	LOC_Os09g39090	1.19847e-05	0.00818678
grain_width	elg58854_pred_5864	1.20115e-05	0.0137603
grain_length_width_ratio	elg154792_pred_73712	1.2021e-05	0.00818678
grain_length_width_ratio	LOC_Os03g26784	1.2021e-05	0.00818678
grain_width	LOC_Os05g37530	1.21939e-05	0.0137603
grain_width	LOC_Os07g27660	1.21939e-05	0.0137603
grain_length_width_ratio	LOC_Os04g33590	1.22607e-05	0.00818678
grain_length_width_ratio	LOC_Os12g42720	1.22971e-05	0.00818678
meanPH	elg15440_pred_73859	1.24372e-05	0.0276015
grain_length_width_ratio	LOC_Os09g01370	1.25691e-05	0.00818678
grain_length_width_ratio	LOC_Os03g03334	1.25691e-05	0.00818678
grain_length_width_ratio	LOC_Os03g03340	1.25691e-05	0.00818678
grain_width	LOC_Os01g26350	1.26436e-05	0.0137603
grain_length_width_ratio	LOC_Os06g51550	1.26999e-05	0.00818678
grain_length_width_ratio	LOC_Os01g28580	1.27511e-05	0.00818678
culm_number	LOC_Os04g10110	1.2833e-05	0.023766
grain_length_width_ratio	LOC_Os12g31900	1.33202e-05	0.00818678
meanPH	LOC_Os08g23754	1.33222e-05	0.0276015
grain_length_width_ratio	LOC_Os05g13660	1.33451e-05	0.00818678
grain_length_width_ratio	LOC_Os01g47890	1.34557e-05	0.00818678
grain_length_width_ratio	elg151067_pred_70373	1.35235e-05	0.00818678
meanPBN	LOC_Os04g13730	1.36148e-05	0.0301041
grain_length_width_ratio	LOC_Os01g27640	1.37621e-05	0.00818678
meanPH	LOC_Os11g10840	1.37677e-05	0.0276015
culm_number	LOC_Os06g03260	1.40333e-05	0.023766
meanGW	LOC_Os05g27690	1.4073e-05	0.0397933
grain_length_width_ratio	LOC_Os03g15130	1.42543e-05	0.00818678
grain_length_width_ratio	LOC_Os09g32880	1.43188e-05	0.00818678
grain_length_width_ratio	LOC_Os09g21490	1.43188e-05	0.00818678
grain_length_width_ratio	LOC_Os03g41790	1.43403e-05	0.00818678
meanPBN	LOC_Os04g18320	1.45774e-05	0.0301041
grain_width	LOC_Os04g09510	1.46502e-05	0.0137603
meanPBN	LOC_Os04g14900	1.48118e-05	0.0301041
grain_length_width_ratio	LOC_Os04g23270	1.49216e-05	0.00818678
grain_length_width_ratio	elg7761_pred_17452	1.49526e-05	0.00818678
grain_length_width_ratio	LOC_Os01g34040	1.49526e-05	0.00818678
grain_length_width_ratio	LOC_Os03g43309	1.50979e-05	0.00818678
grain_length_width_ratio	LOC_Os03g47560	1.50979e-05	0.00818678
meanPBN	LOC_Os04g18720	1.51346e-05	0.0301041
meanPH	elg36740_pred_88182	1.5315e-05	0.0276015
meanGW	LOC_Os01g24160	1.53935e-05	0.0397933
grain_width	LOC_Os07g12304	1.54046e-05	0.0137603
grain_width	elg20584_pred_80038	1.55149e-05	0.0137603
meanPH	LOC_Os09g02750	1.56754e-05	0.0276015
meanGW	LOC_Os01g71780	1.58151e-05	0.0397933
grain_length_width_ratio	LOC_Os05g37530	1.58386e-05	0.00818678
grain_length_width_ratio	LOC_Os07g27660	1.58386e-05	0.00818678
grain_length_width_ratio	LOC_Os07g17050	1.58839e-05	0.00818678
culm_number	LOC_Os06g41510	1.59425e-05	0.023766
LPPUB	elg78411_pred_17397	1.59722e-05	0.0412406
grain_length_width_ratio	LOC_Os05g08190	1.59891e-05	0.00818678
grain_length_width_ratio	LOC_Os09g17060	1.59891e-05	0.00818678
grain_width	LOC_Os02g18060	1.63203e-05	0.0137603
grain_width	LOC_Os07g17080	1.63203e-05	0.0137603
grain_length_width_ratio	LOC_Os03g26870	1.63471e-05	0.00818678
grain_width	LOC_Os07g16170	1.65595e-05	0.0137603
grain_width	LOC_Os07g17040	1.65595e-05	0.0137603
grain_width	LOC_Os11g19620	1.65595e-05	0.0137603
meanPBN	LOC_Os04g21580	1.66023e-05	0.0301041
LPPUB	elg72726_pred_13918	1.67327e-05	0.0412406
LPPUB	elg70375_pred_12494	1.67327e-05	0.0412406
meanPH	LOC_Os03g61360	1.68686e-05	0.0276015
meanPH	elg3148_pred_85790	1.68765e-05	0.0276015
grain_length_width_ratio	LOC_Os04g59200	1.69302e-05	0.00818678
grain_width	LOC_Os02g18040	1.73925e-05	0.0137603
grain_width	LOC_Os11g13780	1.73925e-05	0.0137603
grain_length_width_ratio	elg97521_pred_28519	1.75343e-05	0.00818678
grain_length_width_ratio	LOC_Os04g22150	1.78254e-05	0.00818678
grain_length_width_ratio	LOC_Os04g09510	1.7924e-05	0.00818678
grain_width	elg7761_pred_17452	1.82458e-05	0.0137603
grain_width	LOC_Os06g47010	1.84106e-05	0.0137603
grain_length_width_ratio	elg131751_pred_53992	1.85918e-05	0.00818678
grain_length_width_ratio	LOC_Os05g37560	1.85918e-05	0.00818678
grain_length_width_ratio	LOC_Os01g27900	1.85918e-05	0.00818678
grain_length_width_ratio	LOC_Os09g40075	1.85918e-05	0.00818678
grain_length_width_ratio	LOC_Os06g51380	1.8657e-05	0.00818678
grain_length_width_ratio	LOC_Os02g54940	1.88071e-05	0.00818678
grain_width	LOC_Os07g12310	1.88171e-05	0.0137603
grain_length_width_ratio	LOC_Os07g17070	1.8879e-05	0.00818678
grain_length_width_ratio	LOC_Os07g17080	1.8879e-05	0.00818678
grain_length_width_ratio	LOC_Os01g31200	1.8879e-05	0.00818678
meanGW	LOC_Os04g09510	1.90794e-05	0.0424601
grain_width	LOC_Os06g51380	1.91615e-05	0.0137603
meanPH	elg47053_pred_94183	1.91793e-05	0.0290801
grain_length_width_ratio	elg17826_pred_77933	1.92884e-05	0.00818678
grain_length_width_ratio	LOC_Os03g39270	1.92884e-05	0.00818678
grain_length_width_ratio	LOC_Os04g22750	1.92884e-05	0.00818678
grain_width	LOC_Os09g16740	1.93152e-05	0.0137603
grain_width	LOC_Os01g50520	1.93284e-05	0.0137603
grain_width	LOC_Os11g17260	1.93284e-05	0.0137603
grain_width	LOC_Os03g33300	1.93889e-05	0.0137603
grain_width	LOC_Os01g27640	1.99131e-05	0.0137603
meanPBN	LOC_Os10g02700	1.99406e-05	0.0301041
meanGW	LOC_Os11g39300	1.99937e-05	0.0424601
grain_length_width_ratio	LOC_Os06g25930	2.00808e-05	0.00841385
grain_width	elg130855_pred_53156	2.02399e-05	0.0137603
grain_width	elg131751_pred_53992	2.02399e-05	0.0137603
grain_width	LOC_Os05g37560	2.02399e-05	0.0137603
grain_width	LOC_Os09g40075	2.02399e-05	0.0137603
meanGW	LOC_Os11g43130	2.07692e-05	0.0424601
grain_length_width_ratio	LOC_Os07g08360	2.08919e-05	0.00844596
grain_width	LOC_Os09g21490	2.10105e-05	0.0137603
grain_width	LOC_Os05g36994	2.10698e-05	0.0137603
grain_length_width_ratio	LOC_Os07g14370	2.11483e-05	0.00844596
grain_length_width_ratio	LOC_Os01g71370	2.12713e-05	0.00844596
grain_length_width_ratio	LOC_Os07g08870	2.15239e-05	0.00844596
grain_length_width_ratio	elg102176_pred_31210	2.15239e-05	0.00844596
meanPH	LOC_Os04g17380	2.16226e-05	0.0290801
grain_width	elg68580_pred_11458	2.16356e-05	0.0137603
grain_length_width_ratio	LOC_Os03g43250	2.17121e-05	0.00844596
meanPH	LOC_Os06g17960	2.1803e-05	0.0290801
grain_width	LOC_Os01g38310	2.20046e-05	0.0137603
grain_length_width_ratio	elg90434_pred_24527	2.23009e-05	0.00844596
culm_number	LOC_Os03g37050	2.24739e-05	0.023766
culm_number	LOC_Os03g37080	2.24739e-05	0.023766
culm_number	LOC_Os03g37060	2.24739e-05	0.023766
grain_length_width_ratio	LOC_Os09g16750	2.24833e-05	0.00844596
grain_length_width_ratio	LOC_Os03g59920	2.24833e-05	0.00844596
grain_width	LOC_Os03g63010	2.27295e-05	0.0137603
meanPBN	LOC_Os10g36320	2.27696e-05	0.0301041
meanPH	LOC_Os01g38570	2.31366e-05	0.0290801
grain_length_width_ratio	elg155544_pred_74501	2.34614e-05	0.00847468
grain_length_width_ratio	LOC_Os07g17010	2.34614e-05	0.00847468
grain_length_width_ratio	LOC_Os03g59780	2.34614e-05	0.00847468
grain_length_width_ratio	LOC_Os07g17060	2.3597e-05	0.00847468
meanPH	LOC_Os01g36400	2.36637e-05	0.0290801
meanPH	LOC_Os01g36420	2.40915e-05	0.0290801
meanPH	elg21534_pred_80649	2.40915e-05	0.0290801
grain_length_width_ratio	LOC_Os02g05590	2.42964e-05	0.00863104
grain_width	LOC_Os01g28600	2.43428e-05	0.0137603
grain_width	LOC_Os01g32100	2.43428e-05	0.0137603
meanGW	elg128849_pred_51118	2.4721e-05	0.0475662
grain_length_width_ratio	elg76264_pred_16244	2.49644e-05	0.00872654
meanPBN	LOC_Os10g36260	2.50887e-05	0.0301041
grain_length_width_ratio	LOC_Os03g26830	2.50993e-05	0.00872654
meanPH	LOC_Os04g04990	2.53089e-05	0.0290801
grain_width	LOC_Os12g31900	2.56196e-05	0.0137603
meanPH	LOC_Os01g38910	2.57818e-05	0.0290801
culm_number	LOC_Os06g44570	2.58003e-05	0.023766
grain_width	LOC_Os02g56650	2.61544e-05	0.0137603
meanPBN	LOC_Os03g07680	2.61903e-05	0.0301041
grain_width	LOC_Os01g26390	2.62238e-05	0.0137603
grain_length_width_ratio	elg22687_pred_81208	2.64071e-05	0.0088065
grain_length_width_ratio	LOC_Os04g31410	2.64071e-05	0.0088065
grain_length_width_ratio	LOC_Os01g38590	2.64071e-05	0.0088065
grain_length_width_ratio	LOC_Os02g11670	2.64071e-05	0.0088065
grain_width	LOC_Os01g27900	2.7017e-05	0.0137603
grain_length_width_ratio	LOC_Os09g17010	2.7051e-05	0.00892669
culm_number	LOC_Os06g41520	2.70946e-05	0.023766
LPPUB	elg128980_pred_51239	2.71635e-05	0.0412406
meanPH	elg67970_pred_11032	2.72185e-05	0.0296773
grain_width	LOC_Os07g17070	2.72505e-05	0.0137603
grain_width	LOC_Os09g18060	2.72505e-05	0.0137603
culm_number	LOC_Os06g41610	2.74103e-05	0.023766
meanGW	LOC_Os03g38430	2.77279e-05	0.0490445
grain_width	elg94353_pred_26810	2.77757e-05	0.0137603
grain_length_width_ratio	LOC_Os03g63010	2.78861e-05	0.00892669
grain_length_width_ratio	LOC_Os05g34200	2.79288e-05	0.00892669
grain_length_width_ratio	elg68580_pred_11458	2.79288e-05	0.00892669
grain_length_width_ratio	LOC_Os03g41860	2.81332e-05	0.00892669
meanPBN	LOC_Os04g17080	2.85916e-05	0.0301041
grain_length_width_ratio	LOC_Os02g46780	2.86304e-05	0.00894177
grain_length_width_ratio	LOC_Os09g04660	2.87279e-05	0.00894177
meanPBN	LOC_Os12g27440	2.88395e-05	0.0301041
grain_width	LOC_Os09g16750	2.88624e-05	0.0137603
culm_number	LOC_Os01g48090	2.89043e-05	0.023766
meanPBN	LOC_Os10g37120	2.89668e-05	0.0301041
meanPBN	LOC_Os10g02020	2.92386e-05	0.0301041
grain_width	LOC_Os05g37370	2.93712e-05	0.0137603
grain_width	LOC_Os07g16070	2.94709e-05	0.0137603
meanPBN	LOC_Os12g20010	2.95509e-05	0.0301041
culm_number	elg61967_pred_7268	2.9616e-05	0.023766
culm_number	LOC_Os06g30520	2.9616e-05	0.023766
culm_number	LOC_Os02g29290	2.9616e-05	0.023766
culm_number	LOC_Os06g22310	2.9616e-05	0.023766
grain_length_width_ratio	LOC_Os01g28600	2.97206e-05	0.00908485
grain_length_width_ratio	LOC_Os07g33750	2.97435e-05	0.00908485
grain_width	elg90434_pred_24527	3.02953e-05	0.0137603
meanGW	LOC_Os11g43110	3.03773e-05	0.0490445
grain_width	LOC_Os03g43309	3.051e-05	0.0137603
meanPH	LOC_Os01g38870	3.11442e-05	0.0297611
grain_length_width_ratio	elg119348_pred_44051	3.12651e-05	0.00920546
grain_length_width_ratio	elg142374_pred_63292	3.12651e-05	0.00920546
grain_length_width_ratio	LOC_Os09g01290	3.12651e-05	0.00920546
grain_length_width_ratio	LOC_Os01g28244	3.12651e-05	0.00920546
meanGW	LOC_Os02g29260	3.12868e-05	0.0490445
meanPBN	LOC_Os02g42980	3.13072e-05	0.0301041
meanGW	LOC_Os11g38910	3.14868e-05	0.0490445
meanPBN	LOC_Os10g36310	3.15506e-05	0.0301041
meanPBN	LOC_Os12g28310	3.15506e-05	0.0301041
grain_width	LOC_Os08g28510	3.1591e-05	0.0137603
meanPH	LOC_Os01g36430	3.18588e-05	0.0297611
grain_width	LOC_Os03g59780	3.20665e-05	0.0137603
grain_width	LOC_Os05g37750	3.22467e-05	0.0137603
grain_length_width_ratio	LOC_Os04g17789	3.26314e-05	0.0094144
meanPH	elg79355_pred_17921	3.27091e-05	0.0297611
meanPBN	LOC_Os12g34590	3.30453e-05	0.0301041
grain_length_width_ratio	LOC_Os01g28450	3.32308e-05	0.0094144
grain_length_width_ratio	LOC_Os05g37750	3.32308e-05	0.0094144
grain_length_width_ratio	LOC_Os11g13780	3.32308e-05	0.0094144
meanPH	elg115119_pred_39886	3.34284e-05	0.0297611
meanPBN	LOC_Os04g18640	3.36585e-05	0.0301041
grain_width	LOC_Os05g08310	3.38514e-05	0.0137603
grain_width	LOC_Os09g21470	3.38514e-05	0.0137603
meanPBN	LOC_Os05g47460	3.40357e-05	0.0301041
grain_width	LOC_Os09g39090	3.40771e-05	0.0137603
grain_length_width_ratio	LOC_Os05g40800	3.44655e-05	0.0094144
grain_length_width_ratio	elg109411_pred_35669	3.48908e-05	0.0094144
grain_length_width_ratio	LOC_Os04g15930	3.48908e-05	0.0094144
meanPBN	LOC_Os04g13890	3.49435e-05	0.0301041
meanPBN	LOC_Os04g15770	3.49435e-05	0.0301041
meanPBN	LOC_Os04g15780	3.49435e-05	0.0301041
culm_number	elg117906_pred_42654	3.50486e-05	0.023766
grain_length_width_ratio	elg71969_pred_13493	3.51168e-05	0.0094144
grain_length_width_ratio	LOC_Os05g13680	3.51434e-05	0.0094144
grain_length_width_ratio	LOC_Os05g13690	3.51434e-05	0.0094144
grain_length_width_ratio	elg99873_pred_29917	3.51434e-05	0.0094144
culm_number	elg119493_pred_44210	3.54007e-05	0.023766
grain_width	LOC_Os12g32536	3.54424e-05	0.0137603
grain_width	LOC_Os01g38320	3.54424e-05	0.0137603
grain_length_width_ratio	LOC_Os07g16070	3.58419e-05	0.00952345
grain_width	LOC_Os05g25120	3.5918e-05	0.0137603
meanPH	LOC_Os01g18680	3.61328e-05	0.0297611
grain_width	LOC_Os07g01904	3.67745e-05	0.0137603
meanPH	elg13262_pred_55517	3.719e-05	0.0297611
meanPBN	LOC_Os10g01760	3.73441e-05	0.0301041
meanPH	elg33038_pred_86290	3.73846e-05	0.0297611
culm_number	elg13926_pred_61312	3.76734e-05	0.023766
meanPH	LOC_Os11g10870	3.77727e-05	0.0297611
meanPH	LOC_Os11g10880	3.77727e-05	0.0297611
grain_length_width_ratio	LOC_Os07g17040	3.79326e-05	0.00983898
grain_length_width_ratio	LOC_Os02g17730	3.79326e-05	0.00983898
grain_length_width_ratio	LOC_Os07g15160	3.79326e-05	0.00983898
grain_width	LOC_Os02g56640	3.8017e-05	0.0137603
grain_width	LOC_Os09g17000	3.8038e-05	0.0137603
meanPH	elg67260_pred_10461	3.80611e-05	0.0297611
meanPBN	LOC_Os12g27140	3.81047e-05	0.0301041
meanPBN	LOC_Os04g19410	3.81047e-05	0.0301041
meanPBN	LOC_Os04g16810	3.81047e-05	0.0301041
meanPBN	LOC_Os04g13710	3.81047e-05	0.0301041
meanPBN	LOC_Os04g12690	3.81047e-05	0.0301041
culm_number	LOC_Os05g01640	3.82631e-05	0.023766
meanPH	LOC_Os11g10850	3.87608e-05	0.0297611
grain_width	LOC_Os03g26660	3.8885e-05	0.0137603
grain_width	LOC_Os03g26670	3.8885e-05	0.0137603
meanPH	LOC_Os01g36350	3.91846e-05	0.0297611
grain_length_width_ratio	LOC_Os02g33190	3.91979e-05	0.00986158
grain_length_width_ratio	LOC_Os09g09970	3.91979e-05	0.00986158
grain_length_width_ratio	elg51839_pred_1070	3.92247e-05	0.00986158
meanPBN	LOC_Os11g44280	3.93475e-05	0.0301041
meanPH	elg79355_pred_17922	3.94604e-05	0.0297611
meanPBN	LOC_Os04g17400	3.95744e-05	0.0301041
meanPBN	LOC_Os10g01880	3.95744e-05	0.0301041
grain_width	elg109285_pred_35603	3.97878e-05	0.0137603
grain_width	LOC_Os07g17060	3.99372e-05	0.0137603
meanPH	LOC_Os01g39750	4.00333e-05	0.0297611
grain_width	LOC_Os09g17020	4.01787e-05	0.0137603
grain_width	LOC_Os11g17720	4.01787e-05	0.0137603
culm_number	LOC_Os06g44390	4.02216e-05	0.023766
grain_width	LOC_Os07g27720	4.02495e-05	0.0137603
grain_width	LOC_Os09g16990	4.02495e-05	0.0137603
culm_number	elg131347_pred_53603	4.08755e-05	0.023766
grain_length_width_ratio	elg139453_pred_60950	4.10433e-05	0.00986158
grain_length_width_ratio	LOC_Os08g28510	4.10433e-05	0.00986158
grain_length_width_ratio	LOC_Os09g01410	4.10433e-05	0.00986158
grain_length_width_ratio	LOC_Os04g49790	4.11625e-05	0.00986158
grain_length_width_ratio	LOC_Os05g08040	4.11625e-05	0.00986158
grain_length_width_ratio	LOC_Os06g15280	4.14036e-05	0.00986158
grain_length_width_ratio	LOC_Os02g17820	4.14036e-05	0.00986158
grain_length_width_ratio	LOC_Os03g43270	4.14036e-05	0.00986158
grain_width	LOC_Os09g01400	4.2187e-05	0.0137603
culm_number	LOC_Os04g10070	4.23082e-05	0.023766
meanPBN	LOC_Os11g44230	4.23254e-05	0.0304041
culm_number	LOC_Os01g22850	4.24194e-05	0.023766
grain_width	LOC_Os03g15130	4.24334e-05	0.0137603
grain_width	elg34603_pred_87148	4.2528e-05	0.0137603
grain_width	LOC_Os07g17090	4.25293e-05	0.0137603
meanPBN	LOC_Os04g12864	4.25867e-05	0.0304041
grain_width	LOC_Os01g31040	4.32919e-05	0.0137603
culm_number	elg77528_pred_16918	4.36567e-05	0.023766
grain_length_width_ratio	LOC_Os03g56760	4.46085e-05	0.00986158
meanPH	LOC_Os01g36310	4.47425e-05	0.0320761
grain_length_width_ratio	elg38682_pred_89330	4.48226e-05	0.00986158
grain_length_width_ratio	elg73927_pred_14734	4.48226e-05	0.00986158
grain_length_width_ratio	LOC_Os01g28000	4.48226e-05	0.00986158
grain_length_width_ratio	LOC_Os09g01440	4.48226e-05	0.00986158
grain_length_width_ratio	LOC_Os09g40022	4.48226e-05	0.00986158
grain_length_width_ratio	LOC_Os05g37370	4.48226e-05	0.00986158
grain_length_width_ratio	LOC_Os01g28010	4.48226e-05	0.00986158
grain_length_width_ratio	LOC_Os03g58660	4.48226e-05	0.00986158
grain_width	LOC_Os07g08360	4.49769e-05	0.0137603
meanPH	LOC_Os01g36240	4.52025e-05	0.0320761
culm_number	elg148217_pred_67362	4.53507e-05	0.023766
culm_number	LOC_Os01g23110	4.53507e-05	0.023766
culm_number	LOC_Os02g28920	4.53507e-05	0.023766
culm_number	LOC_Os02g29740	4.53507e-05	0.023766
culm_number	LOC_Os02g29280	4.53507e-05	0.023766
culm_number	LOC_Os02g29730	4.53507e-05	0.023766
grain_width	LOC_Os01g31340	4.59278e-05	0.0137603
grain_width	LOC_Os09g17010	4.59278e-05	0.0137603
grain_length_width_ratio	LOC_Os12g10610	4.59846e-05	0.00986158
grain_length_width_ratio	elg44193_pred_92419	4.59854e-05	0.00986158
LPPUB	elg68940_pred_11659	4.60324e-05	0.0412406
meanPH	LOC_Os12g23710	4.60892e-05	0.0320761
grain_length_width_ratio	LOC_Os06g47010	4.61731e-05	0.00986158
grain_length_width_ratio	LOC_Os11g19320	4.63235e-05	0.00986158
grain_length_width_ratio	LOC_Os09g17049	4.63235e-05	0.00986158
grain_length_width_ratio	elg104844_pred_32793	4.70986e-05	0.00986158
grain_width	elg5536_pred_4072	4.71153e-05	0.0137603
grain_width	elg139453_pred_60950	4.71153e-05	0.0137603
grain_width	LOC_Os09g01410	4.71153e-05	0.0137603
grain_width	elg156467_pred_75278	4.73078e-05	0.0137603
grain_width	LOC_Os04g47200	4.73078e-05	0.0137603
grain_width	LOC_Os03g24620	4.73078e-05	0.0137603
grain_length_width_ratio	LOC_Os01g22850	4.7372e-05	0.00986158
meanPBN	LOC_Os03g07650	4.81885e-05	0.0304041
meanPBN	LOC_Os03g07739	4.81885e-05	0.0304041
meanPBN	LOC_Os10g36280	4.83618e-05	0.0304041
grain_width	LOC_Os09g25520	4.8533e-05	0.0137603
grain_width	LOC_Os12g32450	4.8533e-05	0.0137603
grain_width	LOC_Os02g12090	4.86954e-05	0.0137603
meanPBN	LOC_Os12g24210	4.87869e-05	0.0304041
grain_length_width_ratio	elg111943_pred_37012	4.89317e-05	0.00986158
grain_length_width_ratio	LOC_Os01g34520	4.89317e-05	0.00986158
grain_length_width_ratio	LOC_Os01g28570	4.89317e-05	0.00986158
grain_length_width_ratio	elg143068_pred_63805	4.90834e-05	0.00986158
grain_length_width_ratio	LOC_Os04g22590	4.90834e-05	0.00986158
grain_width	LOC_Os03g56020	4.96798e-05	0.0137603
grain_length_width_ratio	LOC_Os05g32470	4.97202e-05	0.00986158
grain_width	LOC_Os05g08350	4.99398e-05	0.0137603
grain_length_width_ratio	LOC_Os03g41840	5.00585e-05	0.00986158
grain_width	LOC_Os01g25270	5.09322e-05	0.0137603
grain_length_width_ratio	elg53450_pred_2205	5.12021e-05	0.00986158
culm_number	elg131928_pred_54136	5.1246e-05	0.023766
grain_width	LOC_Os09g40022	5.12778e-05	0.0137603
grain_width	LOC_Os03g24760	5.12778e-05	0.0137603
grain_width	LOC_Os05g25110	5.12778e-05	0.0137603
grain_width	LOC_Os09g17040	5.12778e-05	0.0137603
meanPBN	LOC_Os10g21400	5.13809e-05	0.0304041
meanPBN	LOC_Os07g49540	5.13809e-05	0.0304041
grain_length_width_ratio	LOC_Os05g40750	5.14604e-05	0.00986158
meanPBN	LOC_Os10g10664	5.15077e-05	0.0304041
meanPBN	LOC_Os08g26670	5.18637e-05	0.0304041
grain_length_width_ratio	LOC_Os09g38870	5.18923e-05	0.00986158
grain_width	LOC_Os05g30620	5.27101e-05	0.0137603
meanPBN	LOC_Os04g55350	5.27587e-05	0.0304041
grain_length_width_ratio	LOC_Os09g25520	5.28889e-05	0.00986158
grain_width	LOC_Os01g31200	5.2933e-05	0.0137603
LPPUB	LOC_Os10g30270	5.29689e-05	0.0412406
LPPUB	elg122239_pred_46338	5.29689e-05	0.0412406
LPPUB	elg19523_pred_79169	5.29689e-05	0.0412406
LPPUB	elg3871_pred_89795	5.29689e-05	0.0412406
LPPUB	elg19523_pred_79171	5.29689e-05	0.0412406
LPPUB	elg44787_pred_92735	5.29689e-05	0.0412406
LPPUB	elg77858_pred_17087	5.29689e-05	0.0412406
LPPUB	LOC_Os10g12650	5.29689e-05	0.0412406
LPPUB	LOC_Os10g13320	5.29689e-05	0.0412406
LPPUB	LOC_Os10g14980	5.29689e-05	0.0412406
LPPUB	LOC_Os10g13300	5.29689e-05	0.0412406
LPPUB	LOC_Os04g53910	5.29689e-05	0.0412406
LPPUB	LOC_Os10g16800	5.29689e-05	0.0412406
LPPUB	LOC_Os10g17710	5.29689e-05	0.0412406
LPPUB	LOC_Os10g10760	5.29689e-05	0.0412406
LPPUB	LOC_Os10g15020	5.29689e-05	0.0412406
LPPUB	LOC_Os10g15030	5.29689e-05	0.0412406
LPPUB	elg89814_pred_24168	5.29689e-05	0.0412406
LPPUB	LOC_Os10g15079	5.29689e-05	0.0412406
LPPUB	LOC_Os10g16660	5.29689e-05	0.0412406
LPPUB	LOC_Os11g33458	5.29689e-05	0.0412406
meanPBN	elg70043_pred_12317	5.30826e-05	0.0304041
culm_number	elg115046_pred_39809	5.3117e-05	0.023766
culm_number	elg26463_pred_83015	5.3117e-05	0.023766
meanPBN	LOC_Os04g18300	5.39586e-05	0.0304041
grain_length_width_ratio	LOC_Os03g26680	5.40527e-05	0.00986158
grain_length_width_ratio	LOC_Os03g56020	5.40527e-05	0.00986158
grain_length_width_ratio	LOC_Os07g11910	5.40527e-05	0.00986158
grain_width	LOC_Os11g17290	5.41448e-05	0.0137603
grain_width	LOC_Os11g17300	5.41448e-05	0.0137603
culm_number	LOC_Os09g29330	5.42243e-05	0.023766
grain_length_width_ratio	LOC_Os04g19210	5.44662e-05	0.00986158
grain_length_width_ratio	LOC_Os01g38359	5.44662e-05	0.00986158
grain_length_width_ratio	LOC_Os03g26550	5.45713e-05	0.00986158
grain_length_width_ratio	LOC_Os09g04300	5.46183e-05	0.00986158
grain_length_width_ratio	LOC_Os04g17510	5.46183e-05	0.00986158
grain_width	LOC_Os06g47020	5.53581e-05	0.0137603
grain_width	LOC_Os02g11670	5.53581e-05	0.0137603
grain_length_width_ratio	LOC_Os03g43330	5.53839e-05	0.00986158
culm_number	elg16550_pred_76886	5.54114e-05	0.023766
meanPH	LOC_Os01g36320	5.55941e-05	0.037619
grain_width	LOC_Os03g47560	5.56256e-05	0.0137603
grain_width	LOC_Os09g17060	5.56256e-05	0.0137603
meanPBN	LOC_Os12g33840	5.57416e-05	0.0304041
meanPBN	LOC_Os10g16580	5.57416e-05	0.0304041
meanPBN	LOC_Os04g16660	5.57416e-05	0.0304041
meanPBN	LOC_Os10g36950	5.57703e-05	0.0304041
grain_width	LOC_Os12g10610	5.57805e-05	0.0137603
grain_width	LOC_Os05g08280	5.57805e-05	0.0137603
grain_width	elg120661_pred_45071	5.61756e-05	0.0137603
grain_length_width_ratio	elg111186_pred_36590	5.70532e-05	0.00986158
meanPH	elg3148_pred_85791	5.71325e-05	0.037619
culm_number	elg124462_pred_48020	5.7202e-05	0.023766
grain_width	LOC_Os07g26370	5.72148e-05	0.0137603
grain_length_width_ratio	LOC_Os03g20930	5.73183e-05	0.00986158
grain_length_width_ratio	LOC_Os01g34510	5.73183e-05	0.00986158
grain_length_width_ratio	LOC_Os03g43235	5.73183e-05	0.00986158
grain_length_width_ratio	LOC_Os02g12080	5.76087e-05	0.00986158
grain_length_width_ratio	LOC_Os09g17100	5.7617e-05	0.00986158
grain_width	LOC_Os03g56770	5.84227e-05	0.0137603
grain_width	LOC_Os03g56780	5.84227e-05	0.0137603
grain_length_width_ratio	LOC_Os03g21310	5.844e-05	0.00986158
meanPH	elg137746_pred_59515	5.8453e-05	0.037619
grain_width	LOC_Os10g20840	5.85092e-05	0.0137603
grain_width	LOC_Os04g59200	5.86934e-05	0.0137603
meanPBN	LOC_Os04g17770	5.89139e-05	0.0306076
grain_width	LOC_Os07g14380	5.89985e-05	0.0137603
grain_length_width_ratio	LOC_Os05g13750	5.90109e-05	0.00986158
culm_number	LOC_Os06g03430	5.90405e-05	0.023766
culm_number	LOC_Os06g03440	5.90405e-05	0.023766
grain_width	elg59395_pred_6162	5.92082e-05	0.0137603
grain_width	elg5559_pred_4378	5.92082e-05	0.0137603
meanPH	eelg525_pred_95921	5.92083e-05	0.037619
meanPBN	LOC_Os05g46900	5.97547e-05	0.0306076
grain_width	LOC_Os11g04900	5.99121e-05	0.0137603
grain_length_width_ratio	LOC_Os02g32600	6.0211e-05	0.00986158
grain_length_width_ratio	LOC_Os03g56780	6.0211e-05	0.00986158
grain_length_width_ratio	elg46043_pred_93498	6.04788e-05	0.00986158
grain_length_width_ratio	LOC_Os05g03840	6.04788e-05	0.00986158
meanPBN	LOC_Os04g18440	6.05822e-05	0.0306076
meanPH	elg91713_pred_25256	6.0644e-05	0.037619
meanPBN	LOC_Os08g19930	6.07482e-05	0.0306076
meanPH	LOC_Os04g29840	6.09541e-05	0.037619
grain_width	elg3682_pred_88585	6.09667e-05	0.0137603
grain_length_width_ratio	elg32377_pred_85984	6.12614e-05	0.00986158
culm_number	LOC_Os06g41630	6.15408e-05	0.023766
culm_number	LOC_Os01g29060	6.17948e-05	0.023766
culm_number	LOC_Os06g14420	6.17948e-05	0.023766
meanPBN	LOC_Os10g16680	6.18465e-05	0.0306076
grain_width	LOC_Os03g43340	6.1921e-05	0.0137603
grain_width	LOC_Os04g12070	6.1921e-05	0.0137603
grain_length_width_ratio	LOC_Os01g31340	6.2318e-05	0.00986158
grain_length_width_ratio	LOC_Os03g26670	6.2318e-05	0.00986158
grain_length_width_ratio	LOC_Os01g28080	6.2318e-05	0.00986158
grain_length_width_ratio	LOC_Os03g24760	6.2318e-05	0.00986158
grain_length_width_ratio	LOC_Os03g41200	6.2318e-05	0.00986158
grain_width	LOC_Os07g27690	6.2374e-05	0.0137603
grain_width	LOC_Os01g38359	6.2374e-05	0.0137603
grain_width	LOC_Os01g38280	6.2374e-05	0.0137603
meanPBN	LOC_Os08g20170	6.23827e-05	0.0306076
grain_width	LOC_Os01g38740	6.26613e-05	0.0137603
grain_width	elg119348_pred_44051	6.27202e-05	0.0137603
grain_width	elg142374_pred_63292	6.27202e-05	0.0137603
grain_width	LOC_Os09g01290	6.27202e-05	0.0137603
grain_width	LOC_Os01g28244	6.27202e-05	0.0137603
grain_width	LOC_Os01g38380	6.34747e-05	0.0137603
grain_width	LOC_Os01g38390	6.34747e-05	0.0137603
grain_width	LOC_Os01g38070	6.34747e-05	0.0137603
grain_width	LOC_Os01g38400	6.34747e-05	0.0137603
grain_width	LOC_Os01g38410	6.34747e-05	0.0137603
grain_length_width_ratio	LOC_Os05g05520	6.38039e-05	0.00986158
grain_length_width_ratio	LOC_Os07g08620	6.38039e-05	0.00986158
meanPBN	LOC_Os03g28180	6.391e-05	0.0306076
meanPBN	LOC_Os10g21410	6.40879e-05	0.0306076
meanPH	LOC_Os05g04215	6.41326e-05	0.0385376
grain_length_width_ratio	elg46398_pred_93674	6.41977e-05	0.00986158
grain_length_width_ratio	LOC_Os12g09510	6.41977e-05	0.00986158
grain_length_width_ratio	LOC_Os01g33869	6.41977e-05	0.00986158
grain_length_width_ratio	LOC_Os07g11890	6.41977e-05	0.00986158
grain_length_width_ratio	LOC_Os03g41850	6.4416e-05	0.00986158
grain_length_width_ratio	LOC_Os07g27670	6.47254e-05	0.00986158
grain_length_width_ratio	LOC_Os12g19120	6.47719e-05	0.00986158
culm_number	elg74894_pred_15405	6.52861e-05	0.023766
culm_number	elg113414_pred_38341	6.52861e-05	0.023766
culm_number	elg46394_pred_93683	6.52861e-05	0.023766
culm_number	elg67351_pred_10560	6.52861e-05	0.023766
culm_number	elg40768_pred_90496	6.52861e-05	0.023766
culm_number	elg58697_pred_5718	6.52861e-05	0.023766
culm_number	elg84741_pred_21182	6.52861e-05	0.023766
culm_number	elg115374_pred_40151	6.52861e-05	0.023766
culm_number	elg130074_pred_52446	6.52861e-05	0.023766
culm_number	elg19084_pred_78860	6.52861e-05	0.023766
culm_number	elg107866_pred_34642	6.52861e-05	0.023766
culm_number	elg108612_pred_35162	6.52861e-05	0.023766
culm_number	elg41486_pred_90919	6.52861e-05	0.023766
culm_number	LOC_Os01g22860	6.52861e-05	0.023766
culm_number	LOC_Os06g34890	6.52861e-05	0.023766
culm_number	LOC_Os09g01240	6.52861e-05	0.023766
culm_number	LOC_Os01g18940	6.52861e-05	0.023766
culm_number	LOC_Os01g19310	6.52861e-05	0.023766
culm_number	LOC_Os01g23480	6.52861e-05	0.023766
culm_number	LOC_Os02g29760	6.52861e-05	0.023766
culm_number	LOC_Os08g01970	6.52861e-05	0.023766
culm_number	LOC_Os01g23144	6.52861e-05	0.023766
culm_number	LOC_Os02g29770	6.52861e-05	0.023766
culm_number	LOC_Os02g29780	6.52861e-05	0.023766
grain_length_width_ratio	LOC_Os07g29050	6.56854e-05	0.00986158
grain_length_width_ratio	LOC_Os07g28990	6.56854e-05	0.00986158
grain_width	LOC_Os01g28570	6.57183e-05	0.0137603
grain_width	elg112926_pred_37724	6.6257e-05	0.0137603
grain_width	LOC_Os07g11970	6.63045e-05	0.0137603
meanPBN	LOC_Os12g19910	6.64757e-05	0.0306076
meanPBN	LOC_Os12g19930	6.64757e-05	0.0306076
grain_width	LOC_Os05g32470	6.65756e-05	0.0137603
grain_length_width_ratio	LOC_Os01g28420	6.70296e-05	0.00986158
grain_length_width_ratio	LOC_Os07g09914	6.70296e-05	0.00986158
grain_length_width_ratio	elg108310_pred_34967	6.73016e-05	0.00986158
grain_width	LOC_Os01g28000	6.73541e-05	0.0137603
grain_width	LOC_Os01g28080	6.73541e-05	0.0137603
grain_width	LOC_Os01g28010	6.73541e-05	0.0137603
grain_width	LOC_Os07g15160	6.73541e-05	0.0137603
culm_number	LOC_Os07g01480	6.73957e-05	0.023766
grain_length_width_ratio	LOC_Os11g22320	6.7749e-05	0.00986158
grain_length_width_ratio	LOC_Os04g34040	6.80986e-05	0.00986158
grain_length_width_ratio	LOC_Os02g25720	6.80986e-05	0.00986158
grain_length_width_ratio	LOC_Os09g40014	6.80986e-05	0.00986158
grain_length_width_ratio	LOC_Os02g53930	6.80986e-05	0.00986158
grain_length_width_ratio	LOC_Os04g22690	6.80986e-05	0.00986158
meanPH	elg43375_pred_91896	6.82223e-05	0.0385376
grain_length_width_ratio	elg58854_pred_5864	6.85363e-05	0.00986158
grain_length_width_ratio	elg64719_pred_8895	6.85363e-05	0.00986158
grain_length_width_ratio	LOC_Os04g16570	6.85363e-05	0.00986158
grain_length_width_ratio	LOC_Os04g21930	6.85363e-05	0.00986158
grain_length_width_ratio	LOC_Os04g16620	6.85363e-05	0.00986158
grain_length_width_ratio	LOC_Os04g22700	6.85363e-05	0.00986158
grain_width	LOC_Os01g28450	6.8887e-05	0.0137603
meanPBN	LOC_Os07g37520	6.90243e-05	0.0306076
grain_width	LOC_Os03g24720	6.93438e-05	0.0137603
grain_width	LOC_Os09g18050	6.93438e-05	0.0137603
meanPH	elg156037_pred_74923	6.94021e-05	0.0385376
grain_length_width_ratio	elg46539_pred_93789	6.94655e-05	0.00986158
grain_length_width_ratio	LOC_Os04g22140	6.94655e-05	0.00986158
culm_number	LOC_Os11g26050	6.9936e-05	0.023766
grain_width	LOC_Os02g28240	7.01475e-05	0.0137603
grain_width	LOC_Os01g41780	7.01767e-05	0.0137603
grain_length_width_ratio	elg139750_pred_61141	7.0707e-05	0.00986158
grain_length_width_ratio	elg151736_pred_70938	7.0707e-05	0.00986158
grain_length_width_ratio	LOC_Os08g36670	7.0707e-05	0.00986158
grain_length_width_ratio	LOC_Os09g09980	7.0707e-05	0.00986158
grain_length_width_ratio	LOC_Os01g34530	7.0707e-05	0.00986158
grain_length_width_ratio	LOC_Os02g20810	7.0707e-05	0.00986158
grain_length_width_ratio	LOC_Os01g25839	7.09801e-05	0.00986158
grain_length_width_ratio	LOC_Os07g15440	7.09801e-05	0.00986158
grain_length_width_ratio	LOC_Os06g25920	7.09801e-05	0.00986158
meanPH	elg86514_pred_22422	7.10857e-05	0.0385376
grain_length_width_ratio	LOC_Os02g18060	7.14856e-05	0.00986158
grain_length_width_ratio	LOC_Os04g21470	7.14856e-05	0.00986158
meanPH	LOC_Os01g32490	7.14865e-05	0.0385376
grain_width	LOC_Os05g34200	7.23633e-05	0.0137603
grain_width	LOC_Os05g08040	7.23633e-05	0.0137603
meanPBN	LOC_Os04g16860	7.24412e-05	0.0306076
LPPUB	elg4086_pred_90847	7.25196e-05	0.0412406
LPPUB	elg48719_pred_95113	7.25196e-05	0.0412406
LPPUB	elg48414_pred_94961	7.25196e-05	0.0412406
LPPUB	elg128392_pred_50858	7.25196e-05	0.0412406
grain_width	LOC_Os03g43235	7.2642e-05	0.0137603
grain_length_width_ratio	LOC_Os01g41780	7.28322e-05	0.00986158
grain_width	LOC_Os07g17020	7.31581e-05	0.0137603
grain_width	LOC_Os07g29460	7.31581e-05	0.0137603
grain_width	LOC_Os03g24980	7.31581e-05	0.0137603
grain_width	LOC_Os02g48250	7.31581e-05	0.0137603
culm_number	elg129265_pred_51507	7.32304e-05	0.023766
grain_length_width_ratio	elg54913_pred_3176	7.33237e-05	0.00986158
grain_length_width_ratio	elg118484_pred_43293	7.33237e-05	0.00986158
grain_length_width_ratio	elg153373_pred_72531	7.33237e-05	0.00986158
grain_length_width_ratio	elg153100_pred_72222	7.33237e-05	0.00986158
grain_length_width_ratio	LOC_Os06g14860	7.33237e-05	0.00986158
grain_length_width_ratio	LOC_Os03g44550	7.33237e-05	0.00986158
grain_length_width_ratio	LOC_Os01g28320	7.33237e-05	0.00986158
grain_length_width_ratio	LOC_Os01g31590	7.33237e-05	0.00986158
grain_length_width_ratio	LOC_Os05g29840	7.33237e-05	0.00986158
grain_length_width_ratio	LOC_Os05g05530	7.33237e-05	0.00986158
grain_length_width_ratio	LOC_Os03g07630	7.33237e-05	0.00986158
grain_length_width_ratio	LOC_Os09g17040	7.33237e-05	0.00986158
culm_number	LOC_Os11g17740	7.33293e-05	0.023766
culm_number	elg116398_pred_41183	7.36148e-05	0.023766
meanPBN	LOC_Os08g23640	7.36317e-05	0.0306076
grain_length_width_ratio	LOC_Os09g26640	7.36864e-05	0.00986974
meanPBN	LOC_Os01g02610	7.38885e-05	0.0306076
grain_width	LOC_Os02g29610	7.40258e-05	0.0137603
meanPBN	LOC_Os04g12710	7.40548e-05	0.0306076
meanPBN	LOC_Os11g43110	7.41598e-05	0.0306076
meanPBN	LOC_Os12g26480	7.47124e-05	0.0306076
culm_number	elg62031_pred_7270	7.48374e-05	0.023766
grain_length_width_ratio	LOC_Os07g11920	7.48483e-05	0.00989138
grain_length_width_ratio	LOC_Os05g30620	7.48483e-05	0.00989138
grain_width	LOC_Os07g22300	7.50341e-05	0.0137603
grain_length_width_ratio	LOC_Os06g35180	7.53724e-05	0.00989138
grain_width	elg59126_pred_6027	7.54042e-05	0.0137603
grain_length_width_ratio	LOC_Os09g18050	7.54166e-05	0.00989138
meanPH	LOC_Os11g09730	7.55146e-05	0.0385376
grain_length_width_ratio	elg10907_pred_35929	7.62637e-05	0.00989138
grain_length_width_ratio	elg65020_pred_9106	7.62637e-05	0.00989138
grain_length_width_ratio	LOC_Os05g12020	7.62637e-05	0.00989138
grain_length_width_ratio	LOC_Os09g21390	7.62691e-05	0.00989138
meanPBN	LOC_Os12g24900	7.6313e-05	0.0306076
grain_width	LOC_Os08g34340	7.71701e-05	0.0137603
meanPH	elg59532_pred_6270	7.73533e-05	0.0385376
grain_length_width_ratio	LOC_Os07g16170	7.7384e-05	0.00991964
meanPH	elg155306_pred_74200	7.75914e-05	0.0385376
grain_width	LOC_Os02g29680	7.80345e-05	0.0137603
grain_width	elg116841_pred_41582	7.80345e-05	0.0137603
meanPH	LOC_Os01g36440	7.81003e-05	0.0385376
culm_number	LOC_Os07g14180	7.82095e-05	0.023766
culm_number	elg29775_pred_84549	7.83412e-05	0.023766
culm_number	elg83429_pred_20345	7.83412e-05	0.023766
culm_number	LOC_Os01g19060	7.83412e-05	0.023766
grain_width	elg21077_pred_80364	7.84744e-05	0.0137603
grain_length_width_ratio	LOC_Os03g26720	7.86418e-05	0.00991964
grain_length_width_ratio	LOC_Os03g26730	7.86418e-05	0.00991964
grain_length_width_ratio	LOC_Os09g38470	7.86418e-05	0.00991964
grain_length_width_ratio	LOC_Os02g18040	7.89152e-05	0.00991964
grain_length_width_ratio	LOC_Os01g31190	7.89152e-05	0.00991964
grain_length_width_ratio	LOC_Os03g26810	7.89152e-05	0.00991964
grain_length_width_ratio	LOC_Os11g10890	7.89152e-05	0.00991964
meanPBN	LOC_Os10g14250	7.89898e-05	0.0306076
meanPBN	LOC_Os12g33830	7.89898e-05	0.0306076
meanPBN	LOC_Os04g19500	7.89898e-05	0.0306076
grain_width	elg62518_pred_7579	7.91778e-05	0.0137603
grain_width	LOC_Os05g37290	7.91778e-05	0.0137603
grain_width	LOC_Os03g09200	7.91778e-05	0.0137603
grain_width	LOC_Os05g44980	7.91778e-05	0.0137603
grain_width	LOC_Os03g07630	7.91778e-05	0.0137603
meanPBN	LOC_Os12g33870	7.94926e-05	0.0306076
meanPBN	LOC_Os08g19920	7.94926e-05	0.0306076
meanPBN	LOC_Os10g03210	7.94926e-05	0.0306076
meanPBN	LOC_Os04g14840	7.97315e-05	0.0306076
grain_width	elg61605_pred_7032	7.98313e-05	0.0137603
meanPH	LOC_Os01g36450	7.98513e-05	0.0385376
meanPH	elg64920_pred_8964	7.99991e-05	0.0385376
meanPH	elg10726_pred_34747	7.99991e-05	0.0385376
grain_length_width_ratio	elg62083_pred_7309	8.03786e-05	0.0099685
grain_length_width_ratio	elg116962_pred_41806	8.03786e-05	0.0099685
culm_number	elg148122_pred_67248	8.04518e-05	0.023766
grain_length_width_ratio	elg141555_pred_62716	8.0524e-05	0.0099685
grain_length_width_ratio	elg153100_pred_72217	8.0524e-05	0.0099685
grain_width	elg16800_pred_77033	8.07404e-05	0.0137603
meanPH	LOC_Os11g09600	8.091e-05	0.0385376
grain_length_width_ratio	LOC_Os09g13390	8.11103e-05	0.00999508
meanPH	LOC_Os11g44210	8.12628e-05	0.0385376
grain_length_width_ratio	LOC_Os07g14980	8.16562e-05	0.00999508
grain_length_width_ratio	elg71012_pred_12902	8.16562e-05	0.00999508
grain_length_width_ratio	LOC_Os07g25230	8.21315e-05	0.0100158
meanPH	LOC_Os06g46190	8.2257e-05	0.0385376
meanPH	LOC_Os06g46180	8.2257e-05	0.0385376
grain_width	LOC_Os02g05590	8.22597e-05	0.0137603
meanPH	LOC_Os01g37160	8.24711e-05	0.0385376
meanPBN	LOC_Os08g18980	8.26665e-05	0.0306076
grain_width	LOC_Os02g18070	8.35372e-05	0.0137603
grain_width	LOC_Os07g08870	8.35372e-05	0.0137603
grain_length_width_ratio	elg94053_pred_26662	8.38999e-05	0.0100661
grain_length_width_ratio	LOC_Os07g17090	8.38999e-05	0.0100661
grain_length_width_ratio	LOC_Os06g20190	8.38999e-05	0.0100661
grain_width	LOC_Os02g28230	8.40222e-05	0.0137603
meanPBN	LOC_Os05g46890	8.40458e-05	0.0306076
culm_number	LOC_Os02g14390	8.4253e-05	0.023766
grain_length_width_ratio	LOC_Os01g22190	8.43372e-05	0.0100661
meanPBN	LOC_Os08g23270	8.45231e-05	0.0306076
meanPH	elg155824_pred_74683	8.45459e-05	0.0386476
grain_length_width_ratio	LOC_Os03g60950	8.47504e-05	0.0100661
grain_length_width_ratio	LOC_Os11g13500	8.47504e-05	0.0100661
grain_width	LOC_Os02g18020	8.48248e-05	0.0137603
grain_width	LOC_Os02g18030	8.48248e-05	0.0137603
grain_width	LOC_Os11g13790	8.48248e-05	0.0137603
grain_length_width_ratio	elg130855_pred_53156	8.50086e-05	0.0100661
grain_length_width_ratio	elg34603_pred_87148	8.50086e-05	0.0100661
meanPBN	LOC_Os04g16420	8.5045e-05	0.0306076
grain_width	LOC_Os07g33750	8.51027e-05	0.0137603
grain_width	LOC_Os05g37000	8.51027e-05	0.0137603
grain_width	LOC_Os09g21480	8.51027e-05	0.0137603
meanPBN	elg19662_pred_79279	8.51511e-05	0.0306076
meanPBN	eelg654_pred_96009	8.51511e-05	0.0306076
meanPH	elg67398_pred_10547	8.57494e-05	0.0386476
culm_number	LOC_Os06g41350	8.60036e-05	0.023766
grain_length_width_ratio	elg62518_pred_7579	8.61506e-05	0.010107
culm_number	elg19893_pred_79387	8.63243e-05	0.023766
culm_number	elg43759_pred_92200	8.63243e-05	0.023766
culm_number	elg3120_pred_85782	8.66473e-05	0.023766
grain_width	LOC_Os11g04910	8.66487e-05	0.0137603
grain_width	LOC_Os03g39790	8.66487e-05	0.0137603
grain_width	LOC_Os03g43250	8.66942e-05	0.0137603
meanPBN	LOC_Os10g20580	8.74524e-05	0.0307783
grain_length_width_ratio	LOC_Os03g39900	8.7684e-05	0.010107
grain_length_width_ratio	LOC_Os03g49000	8.7684e-05	0.010107
culm_number	elg72628_pred_13848	8.77671e-05	0.023766
culm_number	LOC_Os11g17250	8.77671e-05	0.023766
meanPH	LOC_Os11g11740	8.86536e-05	0.0386476
grain_length_width_ratio	LOC_Os05g36994	8.9318e-05	0.010107
culm_number	LOC_Os04g39740	8.93572e-05	0.023766
grain_width	elg76264_pred_16244	8.9411e-05	0.0137603
grain_width	LOC_Os09g26640	8.94329e-05	0.0137603
grain_width	LOC_Os03g32940	8.94329e-05	0.0137603
grain_width	LOC_Os07g10790	8.9687e-05	0.0137603
grain_width	LOC_Os07g33160	8.9687e-05	0.0137603
grain_length_width_ratio	elg149225_pred_68458	8.96979e-05	0.010107
grain_length_width_ratio	LOC_Os05g24370	8.97284e-05	0.010107
meanPH	elg54828_pred_3104	8.97565e-05	0.0386476
meanPH	elg111203_pred_36623	9.03544e-05	0.0386476
grain_length_width_ratio	elg97521_pred_28518	9.06723e-05	0.010107
grain_length_width_ratio	LOC_Os09g17110	9.08781e-05	0.010107
grain_length_width_ratio	LOC_Os02g47500	9.08781e-05	0.010107
grain_length_width_ratio	LOC_Os03g26570	9.08781e-05	0.010107
meanPH	elg93277_pred_26115	9.09771e-05	0.0386476
meanPH	elg93277_pred_26117	9.09771e-05	0.0386476
meanPBN	LOC_Os02g38830	9.09917e-05	0.0307783
culm_number	LOC_Os01g26350	9.15002e-05	0.023766
meanPBN	LOC_Os08g22430	9.16099e-05	0.0307783
grain_width	LOC_Os01g26410	9.17415e-05	0.0137603
grain_width	LOC_Os06g29330	9.17415e-05	0.0137603
meanPBN	LOC_Os04g18480	9.17646e-05	0.0307783
grain_width	elg67952_pred_11050	9.17726e-05	0.0137603
grain_width	elg70902_pred_12783	9.17726e-05	0.0137603
grain_width	LOC_Os01g30970	9.17726e-05	0.0137603
grain_width	LOC_Os09g22110	9.17726e-05	0.0137603
grain_width	LOC_Os07g25940	9.17726e-05	0.0137603
grain_width	LOC_Os06g13380	9.17726e-05	0.0137603
grain_width	LOC_Os07g14370	9.18173e-05	0.0137603
grain_width	elg100161_pred_30191	9.18173e-05	0.0137603
culm_number	elg77664_pred_17008	9.21106e-05	0.023766
culm_number	LOC_Os10g09620	9.21106e-05	0.023766
culm_number	LOC_Os02g29690	9.21106e-05	0.023766
grain_length_width_ratio	LOC_Os06g13530	9.21383e-05	0.010107
grain_length_width_ratio	LOC_Os07g11900	9.21383e-05	0.010107
grain_length_width_ratio	LOC_Os05g05910	9.21383e-05	0.010107
grain_length_width_ratio	LOC_Os02g48240	9.21383e-05	0.010107
grain_length_width_ratio	LOC_Os07g15700	9.21383e-05	0.010107
grain_width	LOC_Os02g28180	9.27355e-05	0.0137603
meanPBN	LOC_Os12g33820	9.31645e-05	0.0307783
meanPBN	LOC_Os04g19480	9.31645e-05	0.0307783
meanPBN	LOC_Os12g23440	9.31645e-05	0.0307783
meanPBN	LOC_Os10g01440	9.31645e-05	0.0307783
grain_length_width_ratio	LOC_Os02g12070	9.32795e-05	0.010107
grain_length_width_ratio	LOC_Os09g13330	9.32795e-05	0.010107
culm_number	LOC_Os09g29340	9.36748e-05	0.023766
grain_width	LOC_Os08g03460	9.37223e-05	0.0137603
meanPBN	elg148810_pred_68088	9.40944e-05	0.0307783
grain_width	elg111186_pred_36590	9.42308e-05	0.0137603
grain_width	LOC_Os07g11920	9.4504e-05	0.0137603
grain_width	LOC_Os02g29670	9.46333e-05	0.0137603
grain_length_width_ratio	LOC_Os07g01070	9.46951e-05	0.010107
grain_length_width_ratio	elg128890_pred_51159	9.47317e-05	0.010107
culm_number	LOC_Os01g28080	9.49543e-05	0.023766
culm_number	LOC_Os03g57545	9.49543e-05	0.023766
culm_number	LOC_Os03g58660	9.49543e-05	0.023766
culm_number	LOC_Os11g20440	9.49543e-05	0.023766
grain_length_width_ratio	LOC_Os03g60670	9.5124e-05	0.010107
grain_width	LOC_Os11g19320	9.53949e-05	0.0137603
grain_width	LOC_Os12g09510	9.53949e-05	0.0137603
grain_width	LOC_Os09g17049	9.53949e-05	0.0137603
meanPH	elg46777_pred_93990	9.53968e-05	0.0395303
meanPH	LOC_Os01g39770	9.54722e-05	0.0395303
culm_number	LOC_Os01g19710	9.5773e-05	0.023766
meanPBN	elg51485_pred_879	9.5806e-05	0.0310279
grain_length_width_ratio	eelg968_pred_96194	9.58499e-05	0.010107
culm_number	elg10487_pred_33195	9.5874e-05	0.023766
meanPH	LOC_Os12g27960	9.70745e-05	0.0396913
grain_length_width_ratio	LOC_Os05g08310	9.71037e-05	0.010107
grain_length_width_ratio	LOC_Os09g24730	9.71037e-05	0.010107
grain_width	elg88110_pred_23265	9.72761e-05	0.0137603
grain_width	elg97364_pred_28446	9.72761e-05	0.0137603
culm_number	LOC_Os01g31000	9.73273e-05	0.023766
grain_length_width_ratio	elg143068_pred_63807	9.73677e-05	0.010107
grain_length_width_ratio	LOC_Os03g43180	9.73677e-05	0.010107
grain_length_width_ratio	LOC_Os03g43190	9.73677e-05	0.010107
grain_length_width_ratio	LOC_Os03g43200	9.73677e-05	0.010107
grain_length_width_ratio	LOC_Os03g43210	9.73677e-05	0.010107
grain_length_width_ratio	LOC_Os03g43220	9.73677e-05	0.010107
grain_length_width_ratio	LOC_Os03g43230	9.73677e-05	0.010107
grain_length_width_ratio	elg152939_pred_72083	9.73677e-05	0.010107
meanPBN	LOC_Os04g16450	9.78579e-05	0.0313817
grain_width	LOC_Os03g58660	9.80165e-05	0.0137603
grain_length_width_ratio	LOC_Os01g28750	9.83326e-05	0.010107
grain_length_width_ratio	LOC_Os11g35890	9.83326e-05	0.010107
meanPH	LOC_Os12g15620	9.83416e-05	0.039713
grain_length_width_ratio	LOC_Os02g25310	9.91598e-05	0.010107
grain_width	LOC_Os11g08314	9.92953e-05	0.0137603
grain_length_width_ratio	elg18252_pred_78287	0.000100031	0.010107
grain_length_width_ratio	LOC_Os11g13900	0.000100031	0.010107
grain_length_width_ratio	LOC_Os11g13910	0.000100031	0.010107
grain_width	elg99873_pred_29917	0.000100549	0.0137603
culm_number	elg139453_pred_60950	0.000100674	0.023766
culm_number	elg78298_pred_17339	0.000100674	0.023766
culm_number	elg154668_pred_73617	0.000100674	0.023766
culm_number	LOC_Os09g01410	0.000100674	0.023766
culm_number	LOC_Os02g51200	0.000100674	0.023766
culm_number	LOC_Os11g20130	0.000100674	0.023766
grain_length_width_ratio	LOC_Os08g18830	0.000100776	0.010107
grain_length_width_ratio	LOC_Os09g01300	0.000101078	0.010107
grain_length_width_ratio	LOC_Os07g15710	0.000101078	0.010107
meanPBN	LOC_Os12g28400	0.000101297	0.0318598
meanPBN	LOC_Os10g12240	0.000101297	0.0318598
grain_width	LOC_Os07g06850	0.000101392	0.0137603
grain_width	elg50964_pred_601	0.000101392	0.0137603
meanPH	LOC_Os01g40830	0.000101686	0.0401903
meanPH	elg58251_pred_5481	0.000101981	0.0401903
grain_width	LOC_Os04g23090	0.000102168	0.0137603
grain_width	LOC_Os09g21500	0.000102168	0.0137603
grain_width	LOC_Os09g16458	0.000102281	0.0137603
grain_length_width_ratio	LOC_Os07g08590	0.000102321	0.010107
grain_length_width_ratio	LOC_Os07g15210	0.000102321	0.010107
culm_number	LOC_Os01g23260	0.000102356	0.023766
meanPBN	LOC_Os04g19490	0.000102536	0.0319425
grain_length_width_ratio	LOC_Os09g17020	0.00010258	0.010107
grain_length_width_ratio	LOC_Os06g14830	0.00010258	0.010107
culm_number	LOC_Os06g41640	0.000103231	0.023766
meanPH	LOC_Os11g45270	0.000103241	0.0402026
grain_width	elg38682_pred_89330	0.000103348	0.0137603
grain_width	elg73927_pred_14734	0.000103348	0.0137603
grain_width	elg88010_pred_23231	0.000103567	0.0137603
grain_width	LOC_Os01g23470	0.000103567	0.0137603
grain_width	LOC_Os01g38330	0.000103567	0.0137603
grain_width	elg57864_pred_5251	0.000103567	0.0137603
grain_width	LOC_Os08g03110	0.000103567	0.0137603
grain_length_width_ratio	LOC_Os12g10200	0.000103643	0.010107
grain_length_width_ratio	LOC_Os08g34340	0.000103643	0.010107
grain_length_width_ratio	LOC_Os01g32400	0.000103643	0.010107
grain_length_width_ratio	LOC_Os05g13740	0.000104198	0.010107
grain_width	elg71969_pred_13493	0.00010488	0.0137603
meanPH	LOC_Os03g61280	0.000104884	0.0403619
grain_length_width_ratio	elg88768_pred_23625	0.000105417	0.010107
grain_length_width_ratio	LOC_Os05g25120	0.000105417	0.010107
meanPBN	elg17792_pred_77846	0.000105452	0.0323543
grain_length_width_ratio	elg74616_pred_15268	0.00010561	0.010107
grain_width	LOC_Os11g04920	0.000105902	0.0137603
grain_width	LOC_Os01g22730	0.000105964	0.0137603
culm_number	elg124361_pred_47928	0.000106233	0.023766
culm_number	LOC_Os04g11670	0.000106233	0.023766
meanPBN	LOC_Os04g14870	0.00010634	0.0323543
meanPH	elg149200_pred_68436	0.000106435	0.0404825
grain_width	LOC_Os05g13740	0.00010653	0.0137603
culm_number	LOC_Os03g37070	0.000106542	0.023766
meanPBN	LOC_Os10g01090	0.000106826	0.0323543
grain_length_width_ratio	elg88010_pred_23231	0.000107033	0.010107
grain_length_width_ratio	LOC_Os05g04440	0.000107033	0.010107
grain_width	LOC_Os12g32470	0.000107525	0.0137603
culm_number	LOC_Os05g03972	0.000107663	0.023766
grain_length_width_ratio	elg2546_pred_82806	0.000107777	0.010107
grain_length_width_ratio	LOC_Os03g61419	0.000107802	0.010107
grain_length_width_ratio	LOC_Os03g38430	0.000107802	0.010107
grain_length_width_ratio	LOC_Os03g47574	0.000107802	0.010107
grain_width	elg78298_pred_17339	0.00010797	0.0137603
grain_width	elg154668_pred_73617	0.00010797	0.0137603
grain_width	LOC_Os02g25720	0.00010797	0.0137603
grain_width	LOC_Os01g30940	0.00010797	0.0137603
grain_width	LOC_Os01g31000	0.00010797	0.0137603
grain_width	LOC_Os02g51200	0.00010797	0.0137603
grain_width	LOC_Os09g40014	0.00010797	0.0137603
grain_width	LOC_Os02g29300	0.00010797	0.0137603
grain_width	LOC_Os01g38030	0.00010797	0.0137603
grain_width	LOC_Os02g53930	0.00010797	0.0137603
grain_width	LOC_Os05g08260	0.00010797	0.0137603
grain_width	LOC_Os02g11910	0.00010797	0.0137603
grain_width	LOC_Os01g22450	0.00010797	0.0137603
grain_width	LOC_Os11g20130	0.00010797	0.0137603
grain_width	LOC_Os02g28220	0.00010797	0.0137603
grain_length_width_ratio	LOC_Os01g28410	0.000108055	0.010107
grain_length_width_ratio	LOC_Os07g11860	0.000108055	0.010107
grain_length_width_ratio	LOC_Os03g26770	0.000108055	0.010107
culm_number	LOC_Os02g31270	0.000108906	0.023766
grain_width	LOC_Os03g60670	0.000109126	0.0137603
grain_length_width_ratio	elg18753_pred_78614	0.000109224	0.010107
grain_length_width_ratio	LOC_Os09g39880	0.000109224	0.010107
culm_number	LOC_Os06g35150	0.000109364	0.023766
meanPBN	LOC_Os01g50650	0.000110053	0.0327441
grain_width	LOC_Os04g31410	0.000110205	0.0137603
grain_width	LOC_Os05g30700	0.000110205	0.0137603
grain_width	LOC_Os04g30900	0.000110205	0.0137603
grain_width	LOC_Os09g01370	0.000110205	0.0137603
grain_width	LOC_Os03g03334	0.000110205	0.0137603
grain_width	LOC_Os03g03340	0.000110205	0.0137603
grain_width	LOC_Os01g25839	0.000110463	0.0137603
grain_width	LOC_Os05g51340	0.000110463	0.0137603
grain_length_width_ratio	LOC_Os01g27440	0.000110852	0.010107
meanPBN	LOC_Os08g33550	0.000110969	0.0327441
grain_length_width_ratio	LOC_Os11g37360	0.000111199	0.010107
grain_length_width_ratio	elg78298_pred_17339	0.000111482	0.010107
grain_length_width_ratio	elg154668_pred_73617	0.000111482	0.010107
grain_length_width_ratio	LOC_Os09g01310	0.000111482	0.010107
grain_length_width_ratio	LOC_Os01g31000	0.000111482	0.010107
grain_length_width_ratio	LOC_Os04g22730	0.000111482	0.010107
grain_length_width_ratio	LOC_Os02g23920	0.000111482	0.010107
grain_length_width_ratio	LOC_Os02g51200	0.000111482	0.010107
grain_length_width_ratio	LOC_Os04g22760	0.000111482	0.010107
grain_length_width_ratio	LOC_Os01g38320	0.000111482	0.010107
grain_length_width_ratio	LOC_Os02g29300	0.000111482	0.010107
grain_length_width_ratio	LOC_Os03g56740	0.000111482	0.010107
grain_length_width_ratio	LOC_Os05g08260	0.000111482	0.010107
grain_length_width_ratio	LOC_Os11g21870	0.000111482	0.010107
grain_length_width_ratio	LOC_Os03g32820	0.000111482	0.010107
grain_length_width_ratio	LOC_Os03g56750	0.000111482	0.010107
grain_length_width_ratio	LOC_Os11g19910	0.000111482	0.010107
grain_length_width_ratio	LOC_Os11g19920	0.000111482	0.010107
grain_length_width_ratio	LOC_Os11g21850	0.000111482	0.010107
grain_length_width_ratio	LOC_Os05g30040	0.000111482	0.010107
grain_length_width_ratio	LOC_Os11g20130	0.000111482	0.010107
grain_width	elg117906_pred_42654	0.000111655	0.0137603
culm_number	LOC_Os04g47210	0.000111672	0.023766
grain_width	LOC_Os03g56760	0.000112465	0.0137603
grain_width	LOC_Os03g21310	0.000112465	0.0137603
meanPH	LOC_Os07g44840	0.000112473	0.0415215
meanPH	LOC_Os09g16770	0.000112473	0.0415215
culm_number	LOC_Os01g13980	0.000112926	0.023766
meanPH	LOC_Os11g41460	0.000112975	0.0415215
grain_length_width_ratio	LOC_Os09g04650	0.000113079	0.010107
grain_length_width_ratio	LOC_Os04g22740	0.000113079	0.010107
grain_length_width_ratio	LOC_Os01g38330	0.000113079	0.010107
grain_length_width_ratio	LOC_Os04g18360	0.000113079	0.010107
grain_length_width_ratio	LOC_Os04g22770	0.000113079	0.010107
meanPBN	LOC_Os12g20380	0.000113084	0.0327441
grain_length_width_ratio	LOC_Os01g29270	0.000113559	0.010107
meanPBN	LOC_Os12g27720	0.000113665	0.0327441
culm_number	elg133140_pred_55213	0.000113763	0.023766
culm_number	elg14840_pred_68193	0.000113763	0.023766
culm_number	LOC_Os06g34800	0.000113763	0.023766
culm_number	LOC_Os06g26080	0.000113763	0.023766
culm_number	LOC_Os06g31200	0.000113798	0.023766
culm_number	LOC_Os03g38375	0.000113798	0.023766
grain_length_width_ratio	elg45228_pred_93015	0.000113805	0.010107
grain_length_width_ratio	LOC_Os05g08350	0.000113805	0.010107
grain_width	LOC_Os06g28150	0.000113956	0.0137603
culm_number	LOC_Os03g38359	0.000114059	0.023766
grain_length_width_ratio	LOC_Os07g17020	0.000115087	0.0101382
grain_length_width_ratio	LOC_Os01g22730	0.000115087	0.0101382
grain_length_width_ratio	LOC_Os04g30950	0.000115087	0.0101382
grain_width	LOC_Os01g50560	0.000115549	0.0137603
grain_width	elg133838_pred_55858	0.000115585	0.0137603
grain_width	elg11228_pred_37772	0.000115585	0.0137603
grain_width	elg140570_pred_61832	0.000115585	0.0137603
grain_width	elg17753_pred_77850	0.000115585	0.0137603
grain_length_width_ratio	LOC_Os12g31870	0.000115861	0.0101524
grain_length_width_ratio	LOC_Os09g02030	0.000115869	0.0101524
grain_width	LOC_Os02g54940	0.000116075	0.0137603
grain_width	LOC_Os01g47890	0.000116325	0.0137603
meanPH	LOC_Os01g36294	0.000116481	0.0417547
meanPH	LOC_Os11g10890	0.00011653	0.0417547
grain_length_width_ratio	LOC_Os04g18550	0.000117278	0.0101732
meanPBN	LOC_Os12g28290	0.000117521	0.0327441
meanPBN	LOC_Os04g13850	0.000117521	0.0327441
meanPBN	LOC_Os04g14780	0.000117521	0.0327441
grain_width	LOC_Os03g24770	0.000117632	0.0137603
meanPH	LOC_Os01g61300	0.000117764	0.0417547
meanPBN	LOC_Os10g37090	0.000118201	0.0327441
meanPBN	LOC_Os12g26870	0.000118381	0.0327441
grain_length_width_ratio	LOC_Os03g57545	0.000118423	0.0101732
grain_length_width_ratio	LOC_Os11g20440	0.000118423	0.0101732
grain_length_width_ratio	LOC_Os11g23238	0.000118423	0.0101732
grain_length_width_ratio	LOC_Os11g35900	0.000118423	0.0101732
grain_length_width_ratio	LOC_Os11g24120	0.000118423	0.0101732
meanPH	elg121332_pred_45575	0.000118715	0.0417547
grain_length_width_ratio	LOC_Os02g51520	0.000119606	0.0101732
grain_length_width_ratio	LOC_Os08g45280	0.000119694	0.0101732
grain_length_width_ratio	LOC_Os08g45260	0.000119694	0.0101732
grain_width	LOC_Os11g04890	0.000119811	0.0137603
grain_length_width_ratio	LOC_Os05g25140	0.000119842	0.0101732
grain_length_width_ratio	LOC_Os05g51340	0.000119842	0.0101732
grain_length_width_ratio	LOC_Os05g30660	0.000119842	0.0101732
grain_width	elg105587_pred_33251	0.000119866	0.0137603
grain_width	LOC_Os05g08210	0.000119866	0.0137603
grain_width	LOC_Os05g08220	0.000119866	0.0137603
culm_number	elg17858_pred_77947	0.000120811	0.023766
meanPH	LOC_Os06g15570	0.000121213	0.0421797
culm_number	elg5129_pred_1179	0.000121435	0.023766
culm_number	LOC_Os01g23270	0.000121435	0.023766
culm_number	LOC_Os01g48080	0.000121435	0.023766
grain_length_width_ratio	elg132624_pred_54765	0.000121684	0.0102933
grain_length_width_ratio	elg50964_pred_601	0.000121994	0.0102933
grain_width	LOC_Os04g49790	0.000122238	0.0137603
grain_width	LOC_Os07g11910	0.000122238	0.0137603
grain_width	LOC_Os01g51950	0.000122479	0.0137603
grain_length_width_ratio	LOC_Os01g11660	0.000122516	0.0102933
grain_length_width_ratio	elg153544_pred_72687	0.000122516	0.0102933
meanPH	LOC_Os10g39530	0.000122602	0.0422139
grain_length_width_ratio	LOC_Os03g39870	0.00012367	0.0103636
grain_width	LOC_Os09g39880	0.000123911	0.0137603
culm_number	elg126705_pred_49733	0.000124327	0.023766
grain_length_width_ratio	LOC_Os01g26390	0.000124803	0.0104052
grain_length_width_ratio	LOC_Os01g31070	0.000124803	0.0104052
grain_width	LOC_Os02g28920	0.000125205	0.0137603
meanPBN	LOC_Os03g07750	0.00012522	0.0327441
culm_number	elg14815_pred_68239	0.000125575	0.023766
grain_length_width_ratio	LOC_Os07g05590	0.000125955	0.0104641
culm_number	elg156432_pred_75181	0.000126037	0.023766
grain_length_width_ratio	LOC_Os03g59774	0.000126151	0.0104641
meanPBN	LOC_Os05g46920	0.000126258	0.0327441
grain_width	elg153100_pred_72217	0.000126381	0.0137603
culm_number	elg113409_pred_38336	0.000126794	0.023766
meanPH	LOC_Os06g33420	0.00012722	0.0429251
grain_width	elg81708_pred_19422	0.000127536	0.0137603
grain_width	elg148219_pred_67384	0.000127536	0.0137603
grain_width	LOC_Os04g12050	0.000127536	0.0137603
grain_width	LOC_Os05g27710	0.000127536	0.0137603
grain_width	LOC_Os02g53010	0.000127536	0.0137603
grain_width	LOC_Os12g28590	0.000127536	0.0137603
grain_length_width_ratio	elg44995_pred_92898	0.000127716	0.0105404
grain_length_width_ratio	elg135053_pred_57433	0.000127716	0.0105404
meanPH	elg129227_pred_51463	0.000128109	0.0429251
meanPH	LOC_Os12g01290	0.000128605	0.0429251
grain_width	LOC_Os08g41080	0.00012871	0.0137603
grain_width	elg97456_pred_28494	0.00012894	0.0137603
grain_width	LOC_Os01g38270	0.00012894	0.0137603
grain_width	LOC_Os01g38260	0.00012894	0.0137603
grain_width	LOC_Os03g59920	0.00012894	0.0137603
culm_number	LOC_Os11g26060	0.00012921	0.023766
grain_length_width_ratio	elg74018_pred_14853	0.000129522	0.0105928
grain_length_width_ratio	elg10277_pred_31989	0.000129522	0.0105928
grain_length_width_ratio	elg10277_pred_31991	0.000129522	0.0105928
culm_number	elg110481_pred_36218	0.00013036	0.023766
culm_number	elg67493_pred_10633	0.00013036	0.023766
grain_length_width_ratio	LOC_Os01g28590	0.00013039	0.0105928
grain_length_width_ratio	LOC_Os01g38340	0.00013039	0.0105928
grain_length_width_ratio	elg152957_pred_72139	0.000130998	0.0105928
meanPBN	LOC_Os12g24110	0.000131403	0.0327441
grain_length_width_ratio	elg69739_pred_12087	0.000131777	0.0105928
meanPBN	LOC_Os12g34620	0.000132499	0.0327441
meanPBN	LOC_Os10g12700	0.000132499	0.0327441
meanPBN	LOC_Os10g16740	0.000132499	0.0327441
meanPBN	LOC_Os04g14860	0.000132499	0.0327441
meanPBN	LOC_Os04g18900	0.000132499	0.0327441
meanPBN	LOC_Os04g18980	0.000132499	0.0327441
meanPBN	LOC_Os10g02314	0.000132499	0.0327441
meanPBN	LOC_Os12g23754	0.000132499	0.0327441
grain_length_width_ratio	LOC_Os01g28260	0.000132621	0.0105928
grain_length_width_ratio	LOC_Os02g04915	0.000132621	0.0105928
grain_length_width_ratio	LOC_Os06g15080	0.000132621	0.0105928
grain_length_width_ratio	LOC_Os01g38090	0.000132621	0.0105928
meanPH	LOC_Os01g36390	0.000132819	0.0434452
meanPH	elg107895_pred_34668	0.000132819	0.0434452
grain_length_width_ratio	LOC_Os04g30960	0.000132835	0.0105928
grain_length_width_ratio	LOC_Os03g26820	0.000132835	0.0105928
meanPBN	LOC_Os10g36966	0.000133214	0.0327441
meanPBN	LOC_Os04g18110	0.000133258	0.0327441
culm_number	LOC_Os07g11870	0.000133664	0.023766
grain_length_width_ratio	elg18315_pred_78339	0.00013382	0.0105928
grain_width	LOC_Os03g32910	0.000133849	0.0137603
meanPBN	elg98321_pred_29041	0.000134115	0.0327441
meanPBN	LOC_Os04g12700	0.000134115	0.0327441
grain_width	LOC_Os03g41790	0.000134368	0.0137603
grain_width	LOC_Os11g17870	0.000134368	0.0137603
grain_length_width_ratio	LOC_Os01g29110	0.000134509	0.0105928
grain_length_width_ratio	LOC_Os06g41590	0.000134509	0.0105928
grain_length_width_ratio	LOC_Os03g24720	0.000134509	0.0105928
grain_length_width_ratio	LOC_Os03g24770	0.000134509	0.0105928
grain_length_width_ratio	LOC_Os05g37380	0.000134509	0.0105928
meanPBN	LOC_Os05g47600	0.000134627	0.0327441
grain_width	elg132901_pred_55031	0.000134643	0.0137603
meanPBN	LOC_Os12g27520	0.000135141	0.0327441
meanPBN	LOC_Os04g17290	0.000135141	0.0327441
grain_length_width_ratio	LOC_Os01g25270	0.000135189	0.0106208
grain_width	LOC_Os04g12060	0.000135503	0.0137603
grain_width	LOC_Os02g37280	0.000135721	0.0137603
grain_width	LOC_Os04g30880	0.000135721	0.0137603
grain_width	LOC_Os08g03190	0.000135721	0.0137603
grain_width	LOC_Os10g25730	0.000136102	0.0137603
culm_number	LOC_Os03g16280	0.00013613	0.023766
meanPH	LOC_Os04g24800	0.000136305	0.0441438
grain_length_width_ratio	LOC_Os11g35920	0.000136903	0.0107297
meanPBN	LOC_Os10g01180	0.000137308	0.0327645
grain_width	elg72274_pred_13621	0.00013812	0.0137603
grain_width	LOC_Os01g63600	0.00013812	0.0137603
grain_width	LOC_Os09g21600	0.00013812	0.0137603
grain_length_width_ratio	LOC_Os06g28150	0.000138189	0.0108046
meanPBN	LOC_Os12g28230	0.000138233	0.0327645
grain_length_width_ratio	LOC_Os05g37290	0.000138548	0.0108068
meanPBN	LOC_Os08g18140	0.00013925	0.0327645
meanPBN	LOC_Os11g44240	0.00013925	0.0327645
grain_length_width_ratio	LOC_Os02g20010	0.000139818	0.010854
grain_length_width_ratio	LOC_Os01g63660	0.000139818	0.010854
grain_width	elg140200_pred_61550	0.000140426	0.0137603
grain_width	LOC_Os01g38730	0.000140426	0.0137603
grain_length_width_ratio	elg57864_pred_5251	0.000140637	0.0108917
grain_width	LOC_Os08g02820	0.000141177	0.0137603
grain_width	elg154792_pred_73712	0.000141543	0.0137603
grain_length_width_ratio	LOC_Os11g17840	0.000141642	0.0109265
culm_number	LOC_Os03g60010	0.000141724	0.023766
culm_number	elg58553_pred_5666	0.000141724	0.023766
meanPH	elg16593_pred_76905	0.000141777	0.0445895
culm_number	LOC_Os08g03170	0.000142184	0.023766
culm_number	LOC_Os02g12330	0.000142184	0.023766
culm_number	LOC_Os11g17700	0.000142184	0.023766
culm_number	LOC_Os11g18630	0.000142184	0.023766
culm_number	LOC_Os01g18500	0.000142184	0.023766
culm_number	LOC_Os01g23100	0.000142184	0.023766
culm_number	LOC_Os01g23460	0.000142184	0.023766
culm_number	LOC_Os02g26930	0.000142184	0.023766
culm_number	LOC_Os09g01200	0.000142184	0.023766
grain_length_width_ratio	LOC_Os05g50000	0.000142281	0.0109265
grain_length_width_ratio	LOC_Os09g21600	0.000142281	0.0109265
meanPBN	LOC_Os10g32240	0.000142384	0.0327645
grain_length_width_ratio	LOC_Os01g22200	0.000142424	0.0109265
grain_width	LOC_Os05g32480	0.000142633	0.0137603
grain_width	LOC_Os03g61419	0.000142633	0.0137603
grain_width	LOC_Os03g39730	0.000142693	0.0137603
grain_width	LOC_Os11g17250	0.000142693	0.0137603
grain_width	LOC_Os05g25140	0.000142837	0.0137603
grain_width	LOC_Os06g25930	0.000142837	0.0137603
meanPH	elg134640_pred_56685	0.00014344	0.0445895
meanPBN	LOC_Os10g10650	0.000143542	0.0327645
meanPBN	LOC_Os12g22210	0.000143542	0.0327645
meanPH	elg10836_pred_35416	0.000143706	0.0445895
culm_number	elg61563_pred_7022	0.000144118	0.023766
culm_number	elg15177_pred_71628	0.000144118	0.023766
meanPH	LOC_Os03g61260	0.00014444	0.0445895
meanPH	LOC_Os01g39570	0.000144497	0.0445895
culm_number	elg45275_pred_93050	0.000144629	0.023766
grain_length_width_ratio	LOC_Os03g32910	0.000145752	0.0109902
grain_length_width_ratio	elg111756_pred_36912	0.000145944	0.0109902
grain_length_width_ratio	LOC_Os04g12050	0.000145944	0.0109902
grain_length_width_ratio	LOC_Os07g11830	0.000145944	0.0109902
grain_length_width_ratio	LOC_Os09g03050	0.000145944	0.0109902
grain_length_width_ratio	LOC_Os11g19620	0.000145944	0.0109902
grain_length_width_ratio	LOC_Os06g14420	0.000145944	0.0109902
grain_length_width_ratio	elg19221_pred_78954	0.000145944	0.0109902
meanPH	elg24275_pred_81979	0.000145971	0.0446235
grain_length_width_ratio	LOC_Os07g16080	0.000146962	0.0110161
grain_length_width_ratio	LOC_Os05g25150	0.000146962	0.0110161
meanPBN	LOC_Os03g33000	0.000147161	0.0327645
meanPBN	LOC_Os04g18430	0.0001481	0.0327645
grain_length_width_ratio	LOC_Os01g38740	0.000148455	0.0110772
grain_length_width_ratio	LOC_Os02g28240	0.000148455	0.0110772
LPPUB	elg128980_pred_51240	0.000148693	0.0412406
LPPUB	elg91567_pred_25168	0.000148693	0.0412406
LPPUB	elg52267_pred_1391	0.000148693	0.0412406
LPPUB	elg55539_pred_3729	0.000148693	0.0412406
LPPUB	elg73843_pred_14687	0.000148693	0.0412406
LPPUB	elg102784_pred_31537	0.000148693	0.0412406
LPPUB	elg39815_pred_89926	0.000148693	0.0412406
LPPUB	elg112247_pred_37214	0.000148693	0.0412406
LPPUB	elg117472_pred_42257	0.000148693	0.0412406
LPPUB	elg14840_pred_68193	0.000148693	0.0412406
LPPUB	elg49360_pred_95491	0.000148693	0.0412406
LPPUB	elg131578_pred_53881	0.000148693	0.0412406
LPPUB	LOC_Os06g34770	0.000148693	0.0412406
LPPUB	LOC_Os06g34780	0.000148693	0.0412406
LPPUB	LOC_Os06g31710	0.000148693	0.0412406
LPPUB	LOC_Os06g34960	0.000148693	0.0412406
LPPUB	LOC_Os01g49570	0.000148693	0.0412406
LPPUB	LOC_Os12g27220	0.000148693	0.0412406
LPPUB	LOC_Os12g27254	0.000148693	0.0412406
LPPUB	LOC_Os04g16580	0.000148693	0.0412406
grain_width	elg17826_pred_77933	0.000148882	0.0137603
grain_width	LOC_Os01g31070	0.000149078	0.0137603
grain_width	LOC_Os01g24760	0.000149078	0.0137603
culm_number	LOC_Os04g10490	0.00014922	0.023766
culm_number	LOC_Os04g10500	0.00014922	0.023766
grain_length_width_ratio	LOC_Os01g34500	0.000149721	0.0110957
grain_length_width_ratio	LOC_Os08g44880	0.000149721	0.0110957
grain_length_width_ratio	LOC_Os08g44910	0.000149721	0.0110957
grain_width	elg77974_pred_17195	0.000150115	0.0137603
grain_width	LOC_Os07g08590	0.000150115	0.0137603
grain_width	LOC_Os03g26680	0.000150115	0.0137603
grain_width	LOC_Os10g15240	0.000150115	0.0137603
grain_width	elg108310_pred_34967	0.000150303	0.0137603
grain_width	LOC_Os03g41480	0.000150303	0.0137603
grain_width	LOC_Os05g08190	0.000150303	0.0137603
grain_width	LOC_Os04g47090	0.000150303	0.0137603
culm_number	LOC_Os04g47090	0.000150635	0.023766
meanPBN	LOC_Os08g26480	0.000151175	0.0327645
grain_width	LOC_Os01g24840	0.000151636	0.0137603
grain_width	LOC_Os04g12280	0.000151636	0.0137603
culm_number	elg142324_pred_63260	0.000151732	0.023766
culm_number	LOC_Os02g53640	0.000151732	0.023766
culm_number	elg73269_pred_14288	0.000151776	0.023766
grain_width	LOC_Os09g17100	0.000152323	0.0137603
meanPBN	LOC_Os08g26710	0.000152522	0.0327645
grain_width	LOC_Os09g25530	0.000153377	0.0137603
grain_width	LOC_Os03g39780	0.000153377	0.0137603
grain_width	LOC_Os11g17220	0.000153377	0.0137603
grain_width	LOC_Os11g17230	0.000153377	0.0137603
meanPBN	elg49862_pred_95745	0.000153554	0.0327645
grain_length_width_ratio	elg61974_pred_7265	0.00015371	0.0111847
grain_length_width_ratio	LOC_Os03g47070	0.00015371	0.0111847
grain_length_width_ratio	LOC_Os09g25970	0.00015371	0.0111847
grain_length_width_ratio	elg132291_pred_54455	0.00015371	0.0111847
grain_length_width_ratio	LOC_Os08g04120	0.00015371	0.0111847
meanPBN	LOC_Os08g02890	0.000154402	0.0327645
grain_length_width_ratio	elg10434_pred_32899	0.000154668	0.0111847
grain_length_width_ratio	elg17945_pred_77956	0.000154835	0.0111847
grain_length_width_ratio	LOC_Os04g30880	0.000154835	0.0111847
grain_length_width_ratio	LOC_Os02g34210	0.000154835	0.0111847
grain_length_width_ratio	LOC_Os02g34220	0.000154835	0.0111847
grain_length_width_ratio	elg59050_pred_5975	0.000154835	0.0111847
culm_number	LOC_Os04g30520	0.000155147	0.023766
culm_number	elg59454_pred_6240	0.000155147	0.023766
culm_number	elg74322_pred_15042	0.000155147	0.023766
culm_number	elg49224_pred_95395	0.000155147	0.023766
culm_number	elg33120_pred_86362	0.000155147	0.023766
culm_number	elg134610_pred_56700	0.000155147	0.023766
culm_number	elg130631_pred_52946	0.000155147	0.023766
culm_number	elg115225_pred_39997	0.000155147	0.023766
culm_number	elg141984_pred_63007	0.000155147	0.023766
culm_number	elg112247_pred_37214	0.000155147	0.023766
culm_number	elg115225_pred_39999	0.000155147	0.023766
culm_number	elg117472_pred_42257	0.000155147	0.023766
culm_number	LOC_Os06g34960	0.000155147	0.023766
culm_number	LOC_Os07g20130	0.000155147	0.023766
culm_number	LOC_Os07g20135	0.000155147	0.023766
culm_number	LOC_Os07g20164	0.000155147	0.023766
culm_number	LOC_Os07g20260	0.000155147	0.023766
culm_number	LOC_Os09g01740	0.000155147	0.023766
meanPH	LOC_Os06g46110	0.000155287	0.0463246
culm_number	elg58843_pred_5800	0.000155444	0.023766
culm_number	LOC_Os01g26370	0.000155444	0.023766
culm_number	LOC_Os02g29300	0.000155444	0.023766
culm_number	LOC_Os01g23320	0.000155444	0.023766
culm_number	LOC_Os04g34410	0.000155444	0.023766
meanPH	elg15835_pred_76288	0.00015553	0.0463246
grain_width	LOC_Os03g39870	0.000155931	0.0137603
grain_width	LOC_Os09g38870	0.000155931	0.0137603
grain_width	LOC_Os01g38290	0.000155931	0.0137603
meanPBN	LOC_Os10g02740	0.000156538	0.0327645
grain_length_width_ratio	LOC_Os01g22209	0.000156681	0.0111847
grain_length_width_ratio	LOC_Os10g20840	0.000156831	0.0111847
grain_length_width_ratio	elg97570_pred_28565	0.000156831	0.0111847
grain_width	LOC_Os01g21090	0.000156982	0.0137603
grain_width	LOC_Os03g32820	0.000156982	0.0137603
grain_width	LOC_Os05g03680	0.000156982	0.0137603
grain_length_width_ratio	LOC_Os02g19720	0.000156989	0.0111847
grain_length_width_ratio	LOC_Os03g47584	0.000156989	0.0111847
grain_width	elg38149_pred_89033	0.00015699	0.0137603
grain_width	LOC_Os09g17070	0.00015699	0.0137603
meanPH	elg43151_pred_91815	0.000157036	0.0463246
meanPH	LOC_Os12g24030	0.0001572	0.0463246
meanPBN	LOC_Os10g18600	0.000157745	0.0327645
meanPBN	LOC_Os04g57070	0.000157876	0.0327645
grain_width	LOC_Os01g34040	0.000157966	0.0137603
grain_width	LOC_Os01g29488	0.000158135	0.0137603
grain_width	LOC_Os07g26390	0.000158135	0.0137603
culm_number	elg138597_pred_60277	0.00015818	0.023766
culm_number	LOC_Os09g19330	0.000158279	0.023766
culm_number	LOC_Os07g11840	0.000158279	0.023766
culm_number	LOC_Os02g20250	0.000158279	0.023766
LPPUB	LOC_Os07g35080	0.000158436	0.0412406
grain_length_width_ratio	elg67008_pred_10321	0.00015885	0.0111847
LPPUB	LOC_Os06g34520	0.000158907	0.0412406
LPPUB	LOC_Os06g34530	0.000158907	0.0412406
LPPUB	LOC_Os06g34600	0.000158907	0.0412406
LPPUB	LOC_Os06g34630	0.000158907	0.0412406
LPPUB	LOC_Os06g34460	0.000158907	0.0412406
LPPUB	LOC_Os06g34550	0.000158907	0.0412406
LPPUB	LOC_Os06g34560	0.000158907	0.0412406
LPPUB	LOC_Os06g34564	0.000158907	0.0412406
LPPUB	LOC_Os06g34570	0.000158907	0.0412406
LPPUB	elg136465_pred_58432	0.000158907	0.0412406
LPPUB	elg148836_pred_68051	0.000158907	0.0412406
LPPUB	elg69678_pred_12063	0.000158907	0.0412406
LPPUB	elg120323_pred_44837	0.000158907	0.0412406
LPPUB	elg154738_pred_73681	0.000158907	0.0412406
LPPUB	elg40439_pred_90294	0.000158907	0.0412406
LPPUB	elg106780_pred_33923	0.000158907	0.0412406
LPPUB	elg40439_pred_90295	0.000158907	0.0412406
LPPUB	elg106698_pred_33885	0.000158907	0.0412406
LPPUB	LOC_Os10g02284	0.000158907	0.0412406
LPPUB	elg145476_pred_65554	0.000158907	0.0412406
LPPUB	LOC_Os10g02190	0.000158907	0.0412406
LPPUB	LOC_Os10g02270	0.000158907	0.0412406
LPPUB	LOC_Os10g02314	0.000158907	0.0412406
LPPUB	LOC_Os10g02276	0.000158907	0.0412406
LPPUB	LOC_Os10g02300	0.000158907	0.0412406
LPPUB	elg50519_pred_298	0.000158907	0.0412406
LPPUB	elg87450_pred_22919	0.000158907	0.0412406
LPPUB	elg47827_pred_94638	0.000158907	0.0412406
LPPUB	elg117866_pred_42605	0.000158907	0.0412406
LPPUB	elg117866_pred_42609	0.000158907	0.0412406
LPPUB	elg133825_pred_55874	0.000158907	0.0412406
LPPUB	elg149776_pred_68950	0.000158907	0.0412406
LPPUB	elg50664_pred_388	0.000158907	0.0412406
LPPUB	elg69175_pred_11823	0.000158907	0.0412406
LPPUB	elg149776_pred_68948	0.000158907	0.0412406
LPPUB	elg149776_pred_68949	0.000158907	0.0412406
meanPBN	LOC_Os01g72070	0.000159234	0.0327645
meanPBN	LOC_Os10g21420	0.000159234	0.0327645
meanPBN	LOC_Os05g51150	0.000159237	0.0327645
grain_width	elg78039_pred_17215	0.000159371	0.0137603
grain_width	elg100774_pred_30482	0.000159371	0.0137603
culm_number	elg43727_pred_92175	0.000159586	0.023766
culm_number	elg43724_pred_92190	0.000159586	0.023766
culm_number	elg85537_pred_21752	0.000159586	0.023766
culm_number	elg55509_pred_3717	0.000159586	0.023766
grain_width	LOC_Os06g14270	0.000160169	0.0137603
grain_width	LOC_Os06g14280	0.000160169	0.0137603
grain_width	LOC_Os03g32370	0.00016033	0.0137603
grain_width	LOC_Os03g26550	0.00016033	0.0137603
grain_length_width_ratio	elg83097_pred_20215	0.000160863	0.0111847
grain_length_width_ratio	elg62083_pred_7308	0.000160863	0.0111847
grain_length_width_ratio	elg56568_pred_4459	0.000160863	0.0111847
grain_length_width_ratio	LOC_Os07g27380	0.000160863	0.0111847
grain_length_width_ratio	LOC_Os07g12700	0.000160863	0.0111847
grain_length_width_ratio	LOC_Os03g36350	0.000160863	0.0111847
grain_length_width_ratio	LOC_Os11g28870	0.000160863	0.0111847
grain_width	LOC_Os01g52800	0.000160878	0.0137603
grain_length_width_ratio	LOC_Os10g20830	0.000161497	0.0111847
grain_length_width_ratio	elg129488_pred_51804	0.000161865	0.0111847
grain_length_width_ratio	LOC_Os01g31820	0.000161865	0.0111847
grain_length_width_ratio	elg124364_pred_47930	0.00016206	0.0111847
grain_length_width_ratio	LOC_Os02g25950	0.00016206	0.0111847
grain_length_width_ratio	elg91798_pred_25278	0.00016206	0.0111847
grain_length_width_ratio	LOC_Os07g29210	0.00016206	0.0111847
grain_length_width_ratio	LOC_Os07g23660	0.0001629	0.0111847
grain_length_width_ratio	LOC_Os02g37280	0.0001629	0.0111847
grain_length_width_ratio	LOC_Os05g37000	0.0001629	0.0111847
grain_length_width_ratio	LOC_Os03g24844	0.0001629	0.0111847
meanPBN	LOC_Os04g18850	0.000162979	0.0327645
meanPBN	LOC_Os10g20030	0.000163136	0.0327645
meanPBN	LOC_Os08g18990	0.000163231	0.0327645
culm_number	LOC_Os06g41660	0.000163304	0.023766
culm_number	elg155292_pred_74167	0.000163438	0.023766
culm_number	elg54532_pred_2897	0.000163438	0.023766
culm_number	elg123969_pred_47650	0.000163438	0.023766
culm_number	elg66918_pred_10191	0.000163438	0.023766
culm_number	elg10277_pred_31989	0.000163438	0.023766
culm_number	elg10277_pred_31991	0.000163438	0.023766
culm_number	elg111948_pred_37024	0.000163438	0.023766
culm_number	elg123845_pred_47494	0.000163438	0.023766
culm_number	elg139641_pred_61057	0.000163438	0.023766
culm_number	elg155292_pred_74165	0.000163438	0.023766
culm_number	elg15519_pred_74844	0.000163438	0.023766
culm_number	elg101984_pred_31135	0.000163438	0.023766
culm_number	elg52326_pred_1421	0.000163438	0.023766
culm_number	elg22702_pred_81251	0.000163438	0.023766
culm_number	elg30540_pred_84984	0.000163438	0.023766
culm_number	elg36731_pred_88186	0.000163438	0.023766
culm_number	elg73211_pred_14267	0.000163438	0.023766
culm_number	elg107662_pred_34512	0.000163438	0.023766
culm_number	elg153943_pred_72961	0.000163438	0.023766
culm_number	LOC_Os09g01450	0.000163438	0.023766
culm_number	LOC_Os09g01470	0.000163438	0.023766
culm_number	LOC_Os09g01330	0.000163438	0.023766
culm_number	LOC_Os09g01420	0.000163438	0.023766
culm_number	LOC_Os09g01460	0.000163438	0.023766
culm_number	LOC_Os05g03850	0.000163438	0.023766
culm_number	LOC_Os07g28190	0.000163438	0.023766
culm_number	LOC_Os01g23239	0.000163438	0.023766
culm_number	LOC_Os01g38244	0.000163438	0.023766
culm_number	LOC_Os11g20460	0.000163438	0.023766
culm_number	elg57885_pred_5242	0.000163438	0.023766
meanPBN	LOC_Os08g20030	0.000163516	0.0327645
grain_length_width_ratio	LOC_Os04g41880	0.000164215	0.011193
meanPH	elg19051_pred_78873	0.000164232	0.0471136
grain_width	LOC_Os07g01070	0.000164275	0.0137603
grain_width	elg10347_pred_32319	0.000164921	0.0137603
grain_width	LOC_Os01g11660	0.000164921	0.0137603
grain_width	LOC_Os11g18620	0.000164921	0.0137603
grain_width	LOC_Os01g21510	0.000164921	0.0137603
grain_length_width_ratio	elg43102_pred_91803	0.000165237	0.011193
grain_length_width_ratio	LOC_Os03g52510	0.000165237	0.011193
culm_number	elg88440_pred_23405	0.00016525	0.023766
culm_number	elg19325_pred_78999	0.00016525	0.023766
culm_number	LOC_Os11g17710	0.00016525	0.023766
culm_number	LOC_Os06g03420	0.00016525	0.023766
grain_width	LOC_Os03g47070	0.000165296	0.0137603
grain_width	LOC_Os03g41200	0.000165296	0.0137603
grain_length_width_ratio	elg140204_pred_61575	0.000165334	0.011193
grain_length_width_ratio	elg87574_pred_23003	0.000165334	0.011193
grain_width	LOC_Os02g23920	0.000165494	0.0137603
grain_width	LOC_Os02g21600	0.000165494	0.0137603
grain_width	LOC_Os02g21620	0.000165494	0.0137603
grain_width	LOC_Os03g56740	0.000165494	0.0137603
grain_width	LOC_Os03g56750	0.000165494	0.0137603
grain_width	LOC_Os05g30040	0.000165494	0.0137603
grain_length_width_ratio	LOC_Os01g63600	0.000165715	0.011193
meanPH	LOC_Os04g21450	0.000166125	0.0471136
meanPH	elg15472_pred_74358	0.000166125	0.0471136
grain_width	LOC_Os02g18064	0.00016635	0.0137603
grain_width	LOC_Os03g43270	0.00016635	0.0137603
meanPH	LOC_Os04g30030	0.000166352	0.0471136
grain_length_width_ratio	LOC_Os01g25160	0.000167026	0.011193
culm_number	elg44868_pred_92773	0.000168038	0.023766
culm_number	elg67952_pred_11050	0.000168038	0.023766
culm_number	LOC_Os01g29570	0.000168038	0.023766
culm_number	LOC_Os01g37990	0.000168038	0.023766
culm_number	LOC_Os01g28060	0.000168038	0.023766
culm_number	LOC_Os09g38870	0.000168038	0.023766
culm_number	LOC_Os01g28340	0.000168038	0.023766
culm_number	LOC_Os01g53440	0.000168038	0.023766
culm_number	LOC_Os05g25120	0.000168038	0.023766
culm_number	LOC_Os11g26540	0.000168038	0.023766
grain_width	LOC_Os07g27730	0.00016873	0.0137603
grain_width	LOC_Os02g12340	0.00016873	0.0137603
grain_width	LOC_Os02g11890	0.00016873	0.0137603
culm_number	LOC_Os03g24980	0.000168739	0.023766
grain_width	LOC_Os04g30940	0.000169217	0.0137603
grain_length_width_ratio	LOC_Os01g26350	0.000169467	0.011193
grain_length_width_ratio	LOC_Os05g12000	0.000170424	0.011193
grain_length_width_ratio	LOC_Os05g44980	0.000170424	0.011193
grain_length_width_ratio	elg31425_pred_85496	0.00017058	0.011193
grain_length_width_ratio	LOC_Os04g22260	0.000170844	0.011193
grain_length_width_ratio	LOC_Os07g29030	0.000170844	0.011193
grain_length_width_ratio	LOC_Os04g16630	0.000170844	0.011193
grain_length_width_ratio	LOC_Os09g21470	0.000171236	0.011193
grain_length_width_ratio	LOC_Os01g29488	0.00017136	0.011193
grain_length_width_ratio	LOC_Os05g44470	0.00017136	0.011193
grain_length_width_ratio	elg133869_pred_55909	0.00017136	0.011193
grain_width	elg34543_pred_87073	0.000171551	0.0137603
meanPBN	LOC_Os12g27930	0.000172137	0.0327645
meanPH	elg156037_pred_74925	0.000172222	0.0471136
meanPBN	LOC_Os12g23070	0.000173813	0.0327645
meanPBN	LOC_Os12g23374	0.000173813	0.0327645
grain_length_width_ratio	elg72894_pred_14003	0.000173892	0.011193
grain_length_width_ratio	LOC_Os11g22220	0.000173892	0.011193
grain_width	elg20106_pred_79697	0.000174013	0.0137603
grain_width	elg51814_pred_1059	0.000174013	0.0137603
grain_width	elg20106_pred_79698	0.000174013	0.0137603
grain_width	LOC_Os08g40360	0.000174013	0.0137603
grain_width	LOC_Os01g28300	0.000174013	0.0137603
grain_width	LOC_Os01g28310	0.000174013	0.0137603
grain_width	LOC_Os11g04894	0.000174172	0.0137603
meanPBN	LOC_Os05g47442	0.000174191	0.0327645
meanPBN	LOC_Os03g07690	0.000174191	0.0327645
meanPBN	LOC_Os03g19140	0.000174191	0.0327645
grain_length_width_ratio	elg12225_pred_46822	0.000174435	0.011193
grain_length_width_ratio	elg119390_pred_44070	0.000174435	0.011193
grain_length_width_ratio	LOC_Os05g03930	0.000174435	0.011193
grain_length_width_ratio	LOC_Os07g29020	0.000174435	0.011193
meanPBN	LOC_Os10g01870	0.000174442	0.0327645
meanPH	LOC_Os06g17060	0.000174787	0.0471136
grain_width	LOC_Os02g32600	0.00017484	0.0137603
grain_width	LOC_Os11g46980	0.00017484	0.0137603
grain_width	LOC_Os09g18040	0.00017484	0.0137603
grain_width	LOC_Os09g16380	0.00017484	0.0137603
grain_width	LOC_Os09g01320	0.00017484	0.0137603
grain_width	LOC_Os02g51520	0.00017484	0.0137603
grain_width	LOC_Os02g20060	0.000174966	0.0137603
meanPH	LOC_Os01g13700	0.000175169	0.0471136
culm_number	LOC_Os08g21240	0.00017737	0.0245239
culm_number	LOC_Os01g28260	0.00017737	0.0245239
grain_width	LOC_Os12g30640	0.000177544	0.0137603
grain_width	LOC_Os02g50090	0.000177544	0.0137603
grain_width	LOC_Os01g22352	0.000177544	0.0137603
meanPH	LOC_Os08g18170	0.000177909	0.0471136
grain_width	elg133695_pred_55719	0.000177911	0.0137603
grain_width	elg123969_pred_47650	0.000178098	0.0137603
grain_width	elg61967_pred_7268	0.000178098	0.0137603
grain_width	elg85477_pred_21690	0.000178098	0.0137603
grain_width	elg111948_pred_37024	0.000178098	0.0137603
grain_width	elg123845_pred_47494	0.000178098	0.0137603
grain_width	elg139641_pred_61057	0.000178098	0.0137603
grain_width	elg155292_pred_74165	0.000178098	0.0137603
grain_width	elg15519_pred_74844	0.000178098	0.0137603
grain_width	elg52326_pred_1421	0.000178098	0.0137603
grain_width	elg22702_pred_81251	0.000178098	0.0137603
grain_width	elg30540_pred_84984	0.000178098	0.0137603
grain_width	elg107662_pred_34512	0.000178098	0.0137603
grain_width	elg153943_pred_72961	0.000178098	0.0137603
grain_width	LOC_Os02g24530	0.000178098	0.0137603
grain_width	LOC_Os09g01450	0.000178098	0.0137603
grain_width	LOC_Os09g01470	0.000178098	0.0137603
grain_width	LOC_Os02g22600	0.000178098	0.0137603
grain_width	LOC_Os09g01330	0.000178098	0.0137603
grain_width	LOC_Os09g01420	0.000178098	0.0137603
grain_width	LOC_Os09g01460	0.000178098	0.0137603
grain_width	LOC_Os01g38460	0.000178098	0.0137603
grain_width	LOC_Os03g33110	0.000178098	0.0137603
grain_width	LOC_Os06g30520	0.000178098	0.0137603
grain_width	LOC_Os07g25930	0.000178098	0.0137603
grain_width	LOC_Os07g25960	0.000178098	0.0137603
grain_width	LOC_Os07g25970	0.000178098	0.0137603
grain_width	LOC_Os07g25990	0.000178098	0.0137603
grain_width	LOC_Os07g28190	0.000178098	0.0137603
grain_width	LOC_Os01g23239	0.000178098	0.0137603
grain_width	LOC_Os01g38244	0.000178098	0.0137603
grain_width	LOC_Os01g38440	0.000178098	0.0137603
grain_width	LOC_Os07g25980	0.000178098	0.0137603
grain_width	LOC_Os02g29290	0.000178098	0.0137603
grain_width	LOC_Os02g29620	0.000178098	0.0137603
grain_width	LOC_Os06g22310	0.000178098	0.0137603
grain_width	LOC_Os11g20460	0.000178098	0.0137603
grain_width	elg57885_pred_5242	0.000178098	0.0137603
culm_number	eelg706_pred_96042	0.000178361	0.0245239
meanPBN	LOC_Os12g29400	0.000179049	0.0327645
meanPBN	LOC_Os12g27340	0.000179178	0.0327645
meanPBN	elg69678_pred_12063	0.000179298	0.0327645
meanPBN	elg154738_pred_73681	0.000179298	0.0327645
meanPBN	elg40439_pred_90294	0.000179298	0.0327645
meanPBN	elg139158_pred_60655	0.000179298	0.0327645
meanPBN	LOC_Os12g26810	0.000179298	0.0327645
meanPBN	LOC_Os04g17860	0.000179298	0.0327645
meanPBN	LOC_Os04g18884	0.000179298	0.0327645
meanPBN	LOC_Os04g14850	0.000179298	0.0327645
meanPBN	LOC_Os04g17250	0.000179298	0.0327645
meanPBN	LOC_Os04g18400	0.000179298	0.0327645
meanPBN	LOC_Os10g02276	0.000179298	0.0327645
meanPBN	LOC_Os10g02300	0.000179298	0.0327645
grain_length_width_ratio	LOC_Os09g38840	0.000179409	0.011193
grain_width	LOC_Os02g50460	0.000179646	0.0138145
grain_width	LOC_Os01g49219	0.000179646	0.0138145
culm_number	LOC_Os09g16750	0.00017975	0.0245239
grain_length_width_ratio	elg154792_pred_73713	0.000180074	0.011193
grain_length_width_ratio	elg77974_pred_17195	0.000180133	0.011193
grain_length_width_ratio	LOC_Os02g27140	0.000180133	0.011193
grain_length_width_ratio	LOC_Os01g31330	0.000180133	0.011193
grain_length_width_ratio	LOC_Os02g21130	0.000180133	0.011193
grain_length_width_ratio	LOC_Os11g13790	0.000180133	0.011193
meanPH	elg58133_pred_5397	0.00018021	0.0471136
grain_length_width_ratio	LOC_Os04g22570	0.000180231	0.011193
grain_length_width_ratio	LOC_Os02g37150	0.000180231	0.011193
grain_length_width_ratio	LOC_Os04g32190	0.000180231	0.011193
grain_length_width_ratio	LOC_Os02g26190	0.000180231	0.011193
meanPBN	LOC_Os10g37160	0.00018148	0.032979
meanPH	LOC_Os12g01340	0.000181801	0.0471136
meanPH	LOC_Os09g23700	0.000181999	0.0471136
grain_width	elg83097_pred_20215	0.000182239	0.013881
grain_width	LOC_Os02g12210	0.000182239	0.013881
grain_width	LOC_Os01g50580	0.000182239	0.013881
culm_number	LOC_Os09g32920	0.000182798	0.0245239
culm_number	LOC_Os06g03130	0.000182798	0.0245239
grain_length_width_ratio	LOC_Os02g29774	0.000182971	0.011193
grain_width	LOC_Os04g22210	0.000183162	0.013881
meanPH	LOC_Os04g09720	0.000183175	0.0471136
meanPH	LOC_Os09g08254	0.000183262	0.0471136
grain_width	LOC_Os05g25150	0.000183899	0.013881
grain_width	elg120715_pred_45096	0.000183908	0.013881
grain_width	elg20478_pred_79998	0.000183908	0.013881
grain_width	elg85281_pred_21578	0.000183908	0.013881
meanPH	elg25913_pred_82765	0.000183956	0.0471136
grain_length_width_ratio	elg66585_pred_9970	0.000184006	0.011193
grain_length_width_ratio	LOC_Os04g57910	0.000184006	0.011193
grain_length_width_ratio	elg38409_pred_89164	0.000184006	0.011193
grain_length_width_ratio	LOC_Os01g23900	0.000184006	0.011193
meanPH	elg100826_pred_30503	0.000184723	0.0471136
culm_number	LOC_Os09g01730	0.000185177	0.0245239
meanPBN	LOC_Os04g13760	0.00018615	0.0333662
grain_length_width_ratio	LOC_Os08g28560	0.00018632	0.011193
meanPH	LOC_Os11g29870	0.000186507	0.0471136
meanPH	LOC_Os12g28010	0.000186579	0.0471136
meanPH	LOC_Os01g41780	0.000186579	0.0471136
grain_width	LOC_Os03g42670	0.000186789	0.0140593
grain_width	LOC_Os02g25310	0.00018713	0.0140593
grain_width	LOC_Os03g20780	0.000187843	0.0140805
grain_length_width_ratio	LOC_Os04g23090	0.000187989	0.011193
meanPH	elg34128_pred_86853	0.000188582	0.0471136
meanPH	elg121444_pred_45662	0.000188685	0.0471136
grain_length_width_ratio	elg95700_pred_27555	0.000188837	0.011193
culm_number	LOC_Os06g42950	0.000189032	0.0245239
culm_number	LOC_Os04g48570	0.000189364	0.0245239
grain_length_width_ratio	LOC_Os04g59230	0.000189463	0.011193
grain_length_width_ratio	LOC_Os03g26800	0.000189463	0.011193
grain_length_width_ratio	LOC_Os04g30720	0.000189463	0.011193
grain_length_width_ratio	LOC_Os04g30900	0.000189463	0.011193
grain_length_width_ratio	LOC_Os03g21300	0.000189463	0.011193
grain_length_width_ratio	elg10551_pred_33712	0.000189534	0.011193
grain_length_width_ratio	elg38713_pred_89353	0.000189534	0.011193
grain_length_width_ratio	LOC_Os02g33750	0.000189534	0.011193
grain_length_width_ratio	LOC_Os09g21480	0.000189534	0.011193
grain_width	elg464_pred_3234	0.000190199	0.0141315
meanPBN	LOC_Os10g31330	0.000190903	0.0333662
meanPBN	LOC_Os05g47610	0.000191133	0.0333662
grain_width	LOC_Os01g28590	0.000191899	0.0141315
meanPBN	LOC_Os05g33800	0.000191936	0.0333662
meanPBN	LOC_Os04g20950	0.000192372	0.0333662
meanPBN	LOC_Os12g27640	0.000192372	0.0333662
meanPBN	LOC_Os04g17210	0.000192372	0.0333662
meanPBN	LOC_Os10g21850	0.000192372	0.0333662
grain_length_width_ratio	LOC_Os07g15150	0.000192495	0.011193
grain_length_width_ratio	LOC_Os07g06850	0.000192746	0.011193
grain_length_width_ratio	LOC_Os09g32920	0.000192746	0.011193
grain_width	LOC_Os05g24390	0.000192762	0.0141315
grain_width	LOC_Os05g24380	0.000192762	0.0141315
grain_width	LOC_Os06g14860	0.000192762	0.0141315
grain_width	LOC_Os02g17760	0.000192762	0.0141315
grain_width	LOC_Os03g11810	0.000192762	0.0141315
meanPBN	LOC_Os10g21510	0.000192791	0.0333662
grain_width	elg113243_pred_38083	0.000193399	0.0141315
grain_width	LOC_Os03g33280	0.000193471	0.0141315
grain_width	LOC_Os07g19320	0.000193471	0.0141315
grain_width	LOC_Os06g51550	0.000193471	0.0141315
grain_width	LOC_Os01g24180	0.000193713	0.0141315
grain_length_width_ratio	LOC_Os01g26290	0.000193836	0.011193
grain_length_width_ratio	elg5149_pred_1140	0.000194069	0.011193
grain_length_width_ratio	LOC_Os12g09390	0.000194069	0.011193
grain_length_width_ratio	LOC_Os07g29470	0.000194069	0.011193
grain_length_width_ratio	LOC_Os07g29480	0.000194069	0.011193
LPPUB	elg74413_pred_15093	0.000195098	0.0412406
LPPUB	elg96816_pred_28076	0.000195098	0.0412406
LPPUB	elg62038_pred_7295	0.000195098	0.0412406
LPPUB	elg89080_pred_23766	0.000195098	0.0412406
LPPUB	elg10302_pred_32322	0.000195098	0.0412406
LPPUB	elg52290_pred_1382	0.000195098	0.0412406
LPPUB	elg614_pred_12249	0.000195098	0.0412406
LPPUB	elg83726_pred_20555	0.000195098	0.0412406
LPPUB	elg84800_pred_21233	0.000195098	0.0412406
LPPUB	elg113474_pred_38410	0.000195098	0.0412406
LPPUB	elg113577_pred_38491	0.000195098	0.0412406
LPPUB	elg17842_pred_77921	0.000195098	0.0412406
LPPUB	elg73275_pred_14298	0.000195098	0.0412406
LPPUB	elg8445_pred_21330	0.000195098	0.0412406
LPPUB	LOC_Os11g22790	0.000195098	0.0412406
LPPUB	LOC_Os10g29190	0.000195098	0.0412406
LPPUB	LOC_Os10g28900	0.000195098	0.0412406
LPPUB	LOC_Os10g29350	0.000195098	0.0412406
meanPH	elg54159_pred_2668	0.00019512	0.0483513
grain_width	LOC_Os05g13660	0.000196486	0.0141755
grain_width	LOC_Os01g27720	0.000196486	0.0141755
culm_number	LOC_Os05g30950	0.000196568	0.0245239
culm_number	elg32344_pred_85949	0.000196568	0.0245239
culm_number	elg73156_pred_14244	0.000197039	0.0245239
culm_number	elg103519_pred_32067	0.000197039	0.0245239
culm_number	elg137698_pred_59507	0.000197039	0.0245239
culm_number	LOC_Os06g26090	0.000197039	0.0245239
culm_number	LOC_Os09g29500	0.000197039	0.0245239
culm_number	LOC_Os01g47880	0.000197039	0.0245239
culm_number	LOC_Os07g19550	0.000197039	0.0245239
grain_length_width_ratio	LOC_Os04g23260	0.000197256	0.011193
grain_length_width_ratio	LOC_Os04g30860	0.000197949	0.011193
grain_length_width_ratio	elg24251_pred_81991	0.000197949	0.011193
culm_number	LOC_Os02g29920	0.000198276	0.0245239
meanPH	LOC_Os11g10790	0.000198337	0.0487791
grain_length_width_ratio	elg51814_pred_1059	0.000198729	0.011193
grain_length_width_ratio	LOC_Os05g24390	0.000198729	0.011193
grain_length_width_ratio	LOC_Os05g24380	0.000198729	0.011193
grain_length_width_ratio	LOC_Os09g38200	0.000198729	0.011193
culm_number	LOC_Os06g39850	0.000198733	0.0245239
grain_length_width_ratio	elg133078_pred_55189	0.000199155	0.011193
grain_length_width_ratio	elg113243_pred_38083	0.000199246	0.011193
grain_length_width_ratio	LOC_Os01g51950	0.000199285	0.011193
meanPBN	LOC_Os10g08190	0.000199408	0.0343296
grain_length_width_ratio	LOC_Os08g24470	0.000199958	0.011193
culm_number	LOC_Os03g60030	0.000200544	0.0245239
grain_length_width_ratio	elg89332_pred_23877	0.000200796	0.011193
culm_number	LOC_Os09g25880	0.000200822	0.0245239
grain_length_width_ratio	LOC_Os07g14060	0.000201277	0.011193
grain_width	elg25595_pred_82628	0.000201333	0.0141755
grain_width	LOC_Os05g24370	0.000202038	0.0141755
grain_width	LOC_Os10g05150	0.000202038	0.0141755
grain_length_width_ratio	elg117906_pred_42654	0.000202483	0.011193
grain_length_width_ratio	LOC_Os03g39880	0.000202483	0.011193
grain_length_width_ratio	LOC_Os10g12220	0.000202483	0.011193
grain_length_width_ratio	LOC_Os07g27240	0.000202483	0.011193
grain_length_width_ratio	LOC_Os05g08180	0.000202483	0.011193
grain_length_width_ratio	LOC_Os04g30940	0.000202641	0.011193
grain_length_width_ratio	LOC_Os06g14930	0.000202641	0.011193
grain_width	elg4963_pred_256	0.000202832	0.0141755
grain_width	elg8132_pred_19589	0.000202832	0.0141755
grain_width	LOC_Os09g01440	0.000202832	0.0141755
meanPH	elg49345_pred_95455	0.000202978	0.0495478
grain_width	LOC_Os03g24844	0.000203399	0.0141755
grain_width	LOC_Os03g41850	0.000204083	0.0141755
grain_width	LOC_Os04g34040	0.000204083	0.0141755
grain_width	LOC_Os08g24470	0.000204083	0.0141755
grain_width	elg117689_pred_42442	0.000204083	0.0141755
grain_width	LOC_Os05g08200	0.000204083	0.0141755
culm_number	elg77750_pred_17039	0.000204464	0.0245239
grain_length_width_ratio	LOC_Os01g24060	0.000204479	0.011193
grain_length_width_ratio	elg10312_pred_32312	0.000204479	0.011193
grain_length_width_ratio	elg133219_pred_55289	0.000204648	0.011193
grain_length_width_ratio	LOC_Os02g28180	0.000204648	0.011193
grain_length_width_ratio	LOC_Os07g11970	0.000204648	0.011193
meanPBN	LOC_Os10g17210	0.000204695	0.0345533
meanPBN	LOC_Os12g27160	0.000204695	0.0345533
meanPBN	LOC_Os04g20940	0.000204719	0.0345533
meanPBN	LOC_Os10g36300	0.000204933	0.0345533
grain_width	LOC_Os10g09330	0.000204936	0.0141755
culm_number	elg115176_pred_39934	0.000205318	0.0245239
grain_width	LOC_Os12g31870	0.000206815	0.0141755
culm_number	elg39643_pred_89847	0.000208217	0.0245239
culm_number	LOC_Os06g25110	0.000208217	0.0245239
culm_number	LOC_Os11g17240	0.000208217	0.0245239
culm_number	LOC_Os11g17160	0.000208217	0.0245239
culm_number	LOC_Os11g17220	0.000208217	0.0245239
culm_number	LOC_Os11g17230	0.000208217	0.0245239
culm_number	LOC_Os11g17290	0.000208217	0.0245239
culm_number	LOC_Os11g17300	0.000208217	0.0245239
grain_length_width_ratio	LOC_Os07g25940	0.000208402	0.011193
grain_width	LOC_Os01g25160	0.000208686	0.0141755
grain_width	elg97521_pred_28518	0.000208857	0.0141755
grain_length_width_ratio	LOC_Os09g06890	0.000209107	0.011193
culm_number	elg77672_pred_17000	0.000209218	0.0245239
culm_number	elg4475_pred_93168	0.000209218	0.0245239
culm_number	elg71303_pred_13088	0.000209218	0.0245239
culm_number	LOC_Os02g29650	0.000209218	0.0245239
grain_length_width_ratio	LOC_Os09g09960	0.000209501	0.011193
grain_length_width_ratio	LOC_Os04g12060	0.000209501	0.011193
grain_length_width_ratio	LOC_Os11g32780	0.000209501	0.011193
grain_length_width_ratio	LOC_Os09g38880	0.000209507	0.011193
grain_length_width_ratio	LOC_Os09g17000	0.000209507	0.011193
meanPBN	LOC_Os04g18310	0.000209584	0.0351564
culm_number	elg155531_pred_74464	0.000209612	0.0245239
grain_length_width_ratio	elg17862_pred_77940	0.000209837	0.011193
grain_length_width_ratio	LOC_Os04g16330	0.000209837	0.011193
grain_length_width_ratio	LOC_Os04g16314	0.000209837	0.011193
culm_number	elg92300_pred_25532	0.000210598	0.0245239
culm_number	LOC_Os01g23120	0.000210598	0.0245239
grain_length_width_ratio	LOC_Os02g25320	0.000210657	0.011193
culm_number	LOC_Os02g33050	0.000211515	0.0245239
culm_number	LOC_Os06g41650	0.000211515	0.0245239
grain_length_width_ratio	LOC_Os09g01730	0.000211939	0.011193
culm_number	elg13432_pred_56951	0.000212342	0.0245239
culm_number	elg152231_pred_71398	0.000212342	0.0245239
culm_number	LOC_Os01g28010	0.000212342	0.0245239
culm_number	elg5814_pred_5907	0.000212519	0.0245239
culm_number	elg151392_pred_70593	0.000212519	0.0245239
grain_length_width_ratio	LOC_Os03g33740	0.000212957	0.011193
grain_length_width_ratio	LOC_Os10g15200	0.000212957	0.011193
grain_length_width_ratio	LOC_Os02g12340	0.000212957	0.011193
grain_length_width_ratio	LOC_Os07g11850	0.000212957	0.011193
grain_length_width_ratio	LOC_Os11g13490	0.000213013	0.011193
culm_number	elg41280_pred_90766	0.000213024	0.0245239
culm_number	LOC_Os01g38800	0.000213024	0.0245239
grain_width	LOC_Os06g32350	0.000213077	0.0141755
grain_width	LOC_Os03g57545	0.000213396	0.0141755
grain_width	LOC_Os01g22850	0.000213396	0.0141755
grain_width	LOC_Os01g30980	0.000213396	0.0141755
grain_width	LOC_Os02g19390	0.000213396	0.0141755
grain_width	LOC_Os02g19400	0.000213396	0.0141755
grain_width	LOC_Os01g25280	0.000213396	0.0141755
grain_width	LOC_Os01g30990	0.000213396	0.0141755
grain_width	LOC_Os11g20440	0.000213396	0.0141755
grain_width	LOC_Os06g13410	0.000213396	0.0141755
grain_width	LOC_Os05g08660	0.000213396	0.0141755
grain_width	LOC_Os08g03120	0.000213396	0.0141755
meanPBN	LOC_Os12g19120	0.0002138	0.0353549
grain_width	LOC_Os02g33190	0.000213803	0.0141755
grain_width	LOC_Os01g31190	0.000213803	0.0141755
grain_width	elg66940_pred_10204	0.000214974	0.0141755
grain_width	LOC_Os01g28630	0.000214974	0.0141755
grain_width	LOC_Os01g38000	0.000214974	0.0141755
grain_width	LOC_Os03g35510	0.000214974	0.0141755
grain_length_width_ratio	elg70499_pred_12590	0.000215766	0.011193
culm_number	elg72274_pred_13621	0.000216181	0.0245239
meanPBN	LOC_Os10g01860	0.00021622	0.0353549
meanPBN	elg148810_pred_68087	0.000217177	0.0353549
grain_width	elg72457_pred_13758	0.000217314	0.0141755
grain_width	LOC_Os01g24390	0.000217314	0.0141755
grain_width	LOC_Os09g08525	0.000217371	0.0141755
grain_width	LOC_Os07g15959	0.000217371	0.0141755
meanPBN	LOC_Os02g32600	0.000218106	0.0353549
LPPUB	LOC_Os09g21590	0.000218667	0.0412406
LPPUB	elg136083_pred_58176	0.000218667	0.0412406
LPPUB	LOC_Os04g30530	0.000218667	0.0412406
LPPUB	LOC_Os04g30540	0.000218667	0.0412406
LPPUB	elg155140_pred_74077	0.000218667	0.0412406
LPPUB	LOC_Os09g21689	0.000218667	0.0412406
LPPUB	elg59454_pred_6240	0.000218667	0.0412406
LPPUB	elg62197_pred_7359	0.000218667	0.0412406
LPPUB	elg132032_pred_54254	0.000218667	0.0412406
LPPUB	LOC_Os01g04740	0.000218667	0.0412406
LPPUB	elg96428_pred_27862	0.000218667	0.0412406
LPPUB	elg142289_pred_63198	0.000218667	0.0412406
LPPUB	elg134610_pred_56700	0.000218667	0.0412406
LPPUB	elg67449_pred_10589	0.000218667	0.0412406
LPPUB	elg119190_pred_43956	0.000218667	0.0412406
LPPUB	LOC_Os04g07520	0.000218667	0.0412406
LPPUB	elg59859_pred_6416	0.000218667	0.0412406
LPPUB	LOC_Os06g38603	0.000218667	0.0412406
LPPUB	LOC_Os06g38710	0.000218667	0.0412406
LPPUB	LOC_Os06g38720	0.000218667	0.0412406
LPPUB	LOC_Os06g31320	0.000218667	0.0412406
LPPUB	LOC_Os06g31340	0.000218667	0.0412406
LPPUB	elg1167_pred_48454	0.000218667	0.0412406
LPPUB	elg2688_pred_83467	0.000218667	0.0412406
LPPUB	eelg550_pred_95927	0.000218667	0.0412406
LPPUB	eelg550_pred_95926	0.000218667	0.0412406
LPPUB	elg63175_pred_7950	0.000218667	0.0412406
LPPUB	elg46999_pred_94124	0.000218667	0.0412406
LPPUB	elg1167_pred_48455	0.000218667	0.0412406
LPPUB	elg130655_pred_52968	0.000218667	0.0412406
LPPUB	elg130655_pred_52969	0.000218667	0.0412406
grain_length_width_ratio	elg105587_pred_33251	0.000219373	0.011193
culm_number	elg70499_pred_12589	0.000219433	0.0245239
culm_number	elg40301_pred_90241	0.000219433	0.0245239
culm_number	LOC_Os01g23160	0.000219433	0.0245239
grain_length_width_ratio	LOC_Os09g38460	0.000219992	0.011193
grain_length_width_ratio	LOC_Os05g03870	0.000219992	0.011193
grain_length_width_ratio	LOC_Os04g18540	0.000219992	0.011193
grain_length_width_ratio	LOC_Os04g58680	0.000219992	0.011193
meanPBN	LOC_Os07g34700	0.000220089	0.0353549
meanPBN	LOC_Os10g16560	0.000220089	0.0353549
grain_width	LOC_Os08g10890	0.000220173	0.0141755
grain_width	LOC_Os10g35080	0.000220173	0.0141755
grain_length_width_ratio	elg98034_pred_28848	0.00022022	0.011193
grain_length_width_ratio	LOC_Os07g09814	0.00022022	0.011193
grain_length_width_ratio	LOC_Os08g03190	0.00022022	0.011193
grain_length_width_ratio	LOC_Os03g24620	0.00022022	0.011193
grain_length_width_ratio	LOC_Os02g20070	0.00022022	0.011193
grain_length_width_ratio	LOC_Os03g59510	0.00022022	0.011193
grain_length_width_ratio	elg19901_pred_79441	0.000220252	0.011193
grain_length_width_ratio	LOC_Os01g28270	0.000220252	0.011193
meanPBN	LOC_Os10g18780	0.000221169	0.0353549
meanPBN	LOC_Os02g30000	0.000221576	0.0353549
meanPBN	LOC_Os08g20260	0.000221576	0.0353549
meanPBN	LOC_Os11g44160	0.000221576	0.0353549
grain_length_width_ratio	elg77528_pred_16918	0.000221892	0.011193
grain_length_width_ratio	LOC_Os07g27690	0.000221892	0.011193
grain_length_width_ratio	LOC_Os03g47570	0.000221892	0.011193
culm_number	elg14810_pred_68208	0.000222388	0.0245239
LPPUB	LOC_Os08g16200	0.000222469	0.0412406
LPPUB	elg59731_pred_6352	0.000222469	0.0412406
LPPUB	elg43434_pred_91948	0.000222469	0.0412406
LPPUB	elg41358_pred_90808	0.000222469	0.0412406
LPPUB	LOC_Os08g16210	0.000222469	0.0412406
LPPUB	elg154767_pred_73716	0.000222469	0.0412406
LPPUB	elg16675_pred_76977	0.000222469	0.0412406
LPPUB	elg18272_pred_78313	0.000222469	0.0412406
LPPUB	elg50229_pred_122	0.000222469	0.0412406
LPPUB	elg50229_pred_121	0.000222469	0.0412406
culm_number	elg21096_pred_80388	0.000222496	0.0245239
culm_number	LOC_Os08g07910	0.000222938	0.0245239
grain_width	elg51856_pred_1081	0.000223084	0.0141755
meanPBN	LOC_Os10g08370	0.00022323	0.0354044
culm_number	elg13226_pred_55068	0.000223636	0.0245239
culm_number	LOC_Os06g44590	0.000223636	0.0245239
grain_length_width_ratio	elg119806_pred_44425	0.00022366	0.011193
grain_length_width_ratio	elg59408_pred_6172	0.00022366	0.011193
grain_length_width_ratio	elg117917_pred_42647	0.00022366	0.011193
grain_length_width_ratio	elg36731_pred_88186	0.00022366	0.011193
grain_length_width_ratio	elg73509_pred_14461	0.00022366	0.011193
grain_length_width_ratio	elg5793_pred_5597	0.00022366	0.011193
grain_length_width_ratio	LOC_Os04g22250	0.00022366	0.011193
grain_length_width_ratio	LOC_Os04g22870	0.00022366	0.011193
grain_length_width_ratio	LOC_Os04g21910	0.00022366	0.011193
grain_length_width_ratio	LOC_Os04g21950	0.00022366	0.011193
grain_length_width_ratio	LOC_Os01g38380	0.00022366	0.011193
grain_length_width_ratio	LOC_Os01g38390	0.00022366	0.011193
grain_length_width_ratio	LOC_Os04g18130	0.00022366	0.011193
grain_length_width_ratio	LOC_Os04g21900	0.00022366	0.011193
grain_length_width_ratio	LOC_Os04g21940	0.00022366	0.011193
grain_length_width_ratio	LOC_Os04g22490	0.00022366	0.011193
grain_length_width_ratio	LOC_Os04g22610	0.00022366	0.011193
grain_length_width_ratio	LOC_Os04g22640	0.00022366	0.011193
grain_length_width_ratio	LOC_Os04g22780	0.00022366	0.011193
grain_length_width_ratio	LOC_Os04g22790	0.00022366	0.011193
grain_length_width_ratio	LOC_Os01g38070	0.00022366	0.011193
grain_length_width_ratio	LOC_Os01g38400	0.00022366	0.011193
grain_length_width_ratio	LOC_Os01g38410	0.00022366	0.011193
grain_length_width_ratio	LOC_Os04g22110	0.00022366	0.011193
grain_length_width_ratio	LOC_Os04g22800	0.00022366	0.011193
grain_length_width_ratio	LOC_Os03g33420	0.00022366	0.011193
grain_width	LOC_Os01g18930	0.000223844	0.0141755
grain_length_width_ratio	elg133128_pred_55207	0.000223938	0.011193
grain_length_width_ratio	elg152131_pred_71323	0.000223938	0.011193
grain_length_width_ratio	elg16542_pred_76859	0.000223938	0.011193
grain_length_width_ratio	elg61974_pred_7264	0.000223938	0.011193
grain_length_width_ratio	LOC_Os04g30820	0.000223938	0.011193
grain_length_width_ratio	LOC_Os04g30890	0.000223938	0.011193
grain_length_width_ratio	LOC_Os05g30680	0.000223938	0.011193
meanPBN	elg119829_pred_44470	0.000224051	0.0354044
grain_width	LOC_Os01g31820	0.000224475	0.0141755
grain_width	LOC_Os05g05530	0.000224475	0.0141755
grain_width	LOC_Os05g08150	0.000224475	0.0141755
grain_width	LOC_Os09g38200	0.000224475	0.0141755
grain_width	LOC_Os05g08140	0.000224475	0.0141755
grain_width	LOC_Os11g17850	0.000224475	0.0141755
grain_width	LOC_Os11g23238	0.000224475	0.0141755
grain_width	LOC_Os06g14420	0.000224475	0.0141755
grain_width	LOC_Os07g08620	0.000224707	0.0141755
culm_number	LOC_Os07g26800	0.000224789	0.0245239
culm_number	LOC_Os01g31820	0.000224789	0.0245239
grain_width	LOC_Os10g01310	0.000226241	0.0141755
grain_width	LOC_Os01g65760	0.000226241	0.0141755
grain_length_width_ratio	elg123969_pred_47650	0.00022745	0.011193
grain_length_width_ratio	elg111948_pred_37024	0.00022745	0.011193
grain_length_width_ratio	elg123845_pred_47494	0.00022745	0.011193
grain_length_width_ratio	elg139641_pred_61057	0.00022745	0.011193
grain_length_width_ratio	elg155292_pred_74165	0.00022745	0.011193
grain_length_width_ratio	elg15519_pred_74844	0.00022745	0.011193
grain_length_width_ratio	elg52326_pred_1421	0.00022745	0.011193
grain_length_width_ratio	elg22702_pred_81251	0.00022745	0.011193
grain_length_width_ratio	elg30540_pred_84984	0.00022745	0.011193
grain_length_width_ratio	elg107662_pred_34512	0.00022745	0.011193
grain_length_width_ratio	elg153943_pred_72961	0.00022745	0.011193
grain_length_width_ratio	LOC_Os03g20780	0.00022745	0.011193
grain_length_width_ratio	LOC_Os02g24530	0.00022745	0.011193
grain_length_width_ratio	LOC_Os09g01450	0.00022745	0.011193
grain_length_width_ratio	LOC_Os09g01470	0.00022745	0.011193
grain_length_width_ratio	LOC_Os02g22600	0.00022745	0.011193
grain_length_width_ratio	LOC_Os09g01330	0.00022745	0.011193
grain_length_width_ratio	LOC_Os09g01420	0.00022745	0.011193
grain_length_width_ratio	LOC_Os09g01460	0.00022745	0.011193
grain_length_width_ratio	LOC_Os04g22660	0.00022745	0.011193
grain_length_width_ratio	LOC_Os07g28190	0.00022745	0.011193
grain_length_width_ratio	LOC_Os01g38244	0.00022745	0.011193
grain_length_width_ratio	LOC_Os01g38310	0.00022745	0.011193
grain_length_width_ratio	LOC_Os03g34030	0.00022745	0.011193
grain_length_width_ratio	LOC_Os11g20460	0.00022745	0.011193
grain_length_width_ratio	LOC_Os11g32830	0.00022745	0.011193
grain_length_width_ratio	elg57885_pred_5242	0.00022745	0.011193
meanPBN	LOC_Os02g30690	0.000227975	0.0358512
grain_width	LOC_Os03g33328	0.000228207	0.0141755
grain_width	LOC_Os12g28600	0.000228207	0.0141755
grain_width	LOC_Os01g32400	0.00022849	0.0141755
grain_width	LOC_Os07g27240	0.00022849	0.0141755
grain_width	LOC_Os05g37380	0.00022849	0.0141755
grain_length_width_ratio	LOC_Os09g10880	0.000228503	0.011193
grain_length_width_ratio	elg5841_pred_5932	0.000230883	0.011193
grain_length_width_ratio	elg46777_pred_93990	0.000230883	0.011193
grain_length_width_ratio	elg20106_pred_79697	0.000231408	0.011193
grain_length_width_ratio	elg20106_pred_79698	0.000231408	0.011193
grain_length_width_ratio	elg1171_pred_48457	0.000231408	0.011193
grain_length_width_ratio	LOC_Os01g28300	0.000231408	0.011193
grain_length_width_ratio	LOC_Os01g28310	0.000231408	0.011193
grain_length_width_ratio	LOC_Os03g09200	0.000231408	0.011193
grain_length_width_ratio	LOC_Os06g22180	0.000231408	0.011193
grain_length_width_ratio	LOC_Os03g38375	0.000231408	0.011193
grain_length_width_ratio	LOC_Os01g30990	0.000231408	0.011193
grain_length_width_ratio	LOC_Os05g25110	0.000231408	0.011193
grain_length_width_ratio	LOC_Os05g44440	0.000231408	0.011193
grain_length_width_ratio	LOC_Os12g28590	0.000231408	0.011193
grain_length_width_ratio	LOC_Os06g51530	0.000231446	0.011193
grain_length_width_ratio	elg53534_pred_2322	0.000231518	0.011193
grain_length_width_ratio	elg53534_pred_2321	0.000231518	0.011193
grain_length_width_ratio	elg16114_pred_76503	0.000231518	0.011193
grain_length_width_ratio	LOC_Os02g48540	0.000231518	0.011193
grain_length_width_ratio	LOC_Os01g33240	0.000231518	0.011193
grain_width	elg5149_pred_1140	0.000232064	0.0141755
grain_width	elg113225_pred_38100	0.000232064	0.0141755
grain_width	elg44193_pred_92419	0.000232064	0.0141755
grain_width	LOC_Os06g31810	0.000232064	0.0141755
grain_width	LOC_Os08g25510	0.000233136	0.0141755
grain_length_width_ratio	elg35609_pred_87643	0.000233687	0.0112314
grain_length_width_ratio	LOC_Os02g21600	0.000233687	0.0112314
[truncated: 12,473 more rows]
